# Supplementary material for: The m6A reader YTHDF2 is a negative regulator for dendrite development and maintenance of retinal ganglion cells
Source: eLife. 2022 Feb 18;11:e75827. doi: 10.7554/eLife.75827 (PMC8906807; doi:10.7554/eLife.75827)
Supplement: Supplementary file 1. [file elife-75827-supp1.xlsx]

## Sheet: RIP gene_exp_significant_with_s
Supplementary file 1. List of YTHDF2 target mRNAs by anti YTHDF2 RIP-seq.
Gene_ID	Symbol	description	Input1	YTHDF2 RIP1	Input2	YTHDF2 RIP2	Input	YTHDF2 RIP	log2FoldChange(RIP vs Input)	Pvalue(RIP vs Input)	FDR(RIP vs Input)
ENSMUSG00000069833	Ahnak	AHNAK nucleoprotein (desmoyokin)	3.28726	6.84543	5.27642	6.56155	4.28184	6.70349	2.42165	0.00168702	0.0163384
ENSMUSG00000046020	Pofut1	protein O-fucosyltransferase 1	6.57286	7.94081	7.01075	8.08672	6.7918	8.01376	1.22196	0.00210089	0.0195633
ENSMUSG00000027400	Pdyn	prodynorphin	0	3.71803	0	2.52404	0	3.12104	3.12104	0.0357216	0.178341
ENSMUSG00000044288	Cnr1	cannabinoid receptor 1 (brain)	5.48584	8.44106	6.91369	8.44249	6.19977	8.44177	2.24201	2.39e-05	0.000429363
ENSMUSG00000089417	Gm22009	predicted gene, 22009	16.0069	17.2505	15.151	17.7986	15.579	17.5245	1.94555	6.03e-06	0.000125056
ENSMUSG00000085881	Gm15912	predicted gene 15912	1.67385	4.90105	2.05189	3.93128	1.86287	4.41616	2.55329	0.0137339	0.0869724
ENSMUSG00000047205	Dusp18	dual specificity phosphatase 18	6.78832	8.27401	6.17633	8.23819	6.48233	8.2561	1.77377	5.91e-06	0.000122849
ENSMUSG00000097971	Gm26917	predicted gene, 26917	8.53613	9.05381	8.15068	9.6932	8.34341	9.3735	1.0301	0.00346516	0.0292989
ENSMUSG00000107476	Zfp862-ps	zinc finger protein 862, pseudogene	6.01187	7.65558	6.31583	7.6929	6.16385	7.67424	1.51039	0.000225683	0.00301405
ENSMUSG00000033510	Otud7a	OTU domain containing 7A	4.37266	5.28534	4.23497	6.14353	4.30382	5.71444	1.41062	0.0287951	0.152396
ENSMUSG00000030350	Prmt8	protein arginine N-methyltransferase 8	6.37763	8.70024	5.95029	8.64444	6.16396	8.67234	2.50838	2.62e-12	1.58e-10
ENSMUSG00000043061	Tmem18	transmembrane protein 18	6.72998	8.0524	5.97455	7.52936	6.35226	7.79088	1.43861	0.00146924	0.0145707
ENSMUSG00000043067	Dpy19l1	dpy-19-like 1 (C. elegans)	7.19651	8.85978	7.53601	8.75964	7.36626	8.80971	1.44345	2.41e-05	0.000432269
ENSMUSG00000022257	Laptm4b	lysosomal-associated protein transmembrane 4B	7.10764	7.87695	5.73989	8.31912	6.42377	8.09803	1.67427	0.00186708	0.0177543
ENSMUSG00000022253	Nadk2	NAD kinase 2, mitochondrial	6.15179	8.14826	7.50302	8.38212	6.82741	8.26519	1.43779	0.00955052	0.0659245
ENSMUSG00000031007	Atp6ap2	ATPase, H+ transporting, lysosomal accessory protein 2	5.62042	9.15728	6.96304	9.18173	6.29173	9.16951	2.87778	1.29e-09	5.32e-08
ENSMUSG00000034636	Zyg11b	zyg-ll family member B, cell cycle regulator	7.52293	9.13406	8.38145	8.89059	7.95219	9.01232	1.06013	0.0129709	0.0833489
ENSMUSG00000102411	Gm36936	predicted gene, 36936	4.64945	7.07419	5.49348	6.80578	5.07147	6.93999	1.86852	0.000527244	0.00621014
ENSMUSG00000029426	Scarb2	scavenger receptor class B, member 2	8.76767	10.7354	9.25106	10.7047	9.00936	10.7201	1.7107	4.71e-08	1.52e-06
ENSMUSG00000025702	March8	membrane-associated ring finger (C3HC4) 8	8.14768	9.20637	7.56826	8.66147	7.85797	8.93392	1.07595	0.00427904	0.0347337
ENSMUSG00000032583	Mon1a	MON1 homolog A, secretory traffciking associated	4.64945	6.26672	3.38398	6.46137	4.01671	6.36405	2.34733	0.000379585	0.00467374
ENSMUSG00000032589	Bsn	bassoon	8.76404	10.0972	8.14	10.0743	8.45202	10.0857	1.63371	5.91e-07	1.55e-05
ENSMUSG00000033985	Tesk2	testis-specific kinase 2	6.08353	7.32727	5.4595	6.60914	5.77151	6.9682	1.19669	0.0174946	0.105071
ENSMUSG00000024947	Men1	multiple endocrine neoplasia 1	8.08505	9.05793	7.67577	8.79093	7.88041	8.92443	1.04402	0.00220975	0.0203852
ENSMUSG00000024142	Mlst8	MTOR associated protein, LST8 homolog (S. cerevisiae)	7.27002	8.3962	7.27778	8.19984	7.2739	8.29802	1.02412	0.00348723	0.0294429
ENSMUSG00000040570	Rundc3b	RUN domain containing 3B	6.01187	7.89548	6.54376	7.80954	6.27782	7.85251	1.5747	0.000167842	0.00235899
ENSMUSG00000033237	Arid2	AT rich interactive domain 2 (ARID, RFX-like)	9.01679	10.9667	10.1131	10.7664	9.56495	10.8665	1.30156	0.00338277	0.0286958
ENSMUSG00000064302	Clasp1	CLIP associating protein 1	9.07947	11.0975	9.41962	10.7143	9.24954	10.9059	1.65634	9.13e-08	2.77e-06
ENSMUSG00000109709	Gm45290	predicted gene 45290	0	3.71803	0	3.15702	0	3.43753	3.43753	0.016855	0.102096
ENSMUSG00000001507	Itga3	integrin alpha 3	6.03615	7.5307	6.17633	7.06667	6.10624	7.29868	1.19244	0.00637779	0.047631
ENSMUSG00000019261	Map1s	microtubule-associated protein 1S	6.27933	7.16866	6.37171	7.55389	6.32552	7.36127	1.03575	0.0151392	0.0939208
ENSMUSG00000092060	Bend4	BEN domain containing 4	4.44699	8.82636	7.07949	9.07562	5.76324	8.95099	3.18775	0.0262749	0.142119
ENSMUSG00000010021	Kif19a	kinesin family member 19A	7.41595	8.63555	7.11267	8.4359	7.26431	8.53573	1.27141	0.000245729	0.00323368
ENSMUSG00000038518	Jarid2	jumonji, AT rich interactive domain 2	7.01294	8.19391	7.72666	8.64444	7.3698	8.41917	1.04937	0.0143888	0.090322
ENSMUSG00000009739	Pou6f1	POU domain, class 6, transcription factor 1	8.45289	9.15344	7.36298	9.15793	7.90793	9.15568	1.24775	0.00479746	0.0380423
ENSMUSG00000065952	C330021F23Rik	RIKEN cDNA C330021F23 gene	5.0815	6.20861	3.97119	6.14353	4.52634	6.17607	1.64973	0.0122507	0.079797
ENSMUSG00000022010	Tsc22d1	TSC22 domain family, member 1	9.04099	10.2014	9.01116	10.0806	9.02608	10.141	1.11495	7.06e-05	0.00111942
ENSMUSG00000020520	Galnt10	UDP-N-acetyl-alpha-D-galactosamine:polypeptide N-acetylgalactosaminyltransferase 10	7.1857	7.81986	6.35332	8.2153	6.76951	8.01758	1.24807	0.00526991	0.040886
ENSMUSG00000059263	Usp47	ubiquitin specific peptidase 47	7.77459	9.69056	9.06865	9.58429	8.42162	9.63743	1.21581	0.0171485	0.103418
ENSMUSG00000052062	Pard3b	par-3 family cell polarity regulator beta	6.71501	8.14051	7.39928	8.27554	7.05715	8.20803	1.15088	0.00637801	0.047631
ENSMUSG00000013646	Sh3bp5l	SH3 binding domain protein 5 like	7.47043	8.29511	7.07949	8.48775	7.27496	8.39143	1.11647	0.00203851	0.0191351
ENSMUSG00000028710	Atpaf1	ATP synthase mitochondrial F1 complex assembly factor 1	4.77018	6.59628	5.27642	6.67771	5.0233	6.63699	1.61369	0.00233342	0.0212779
ENSMUSG00000025583	Rptor	regulatory associated protein of MTOR, complex 1	7.95735	8.83118	7.2875	8.74373	7.62243	8.78746	1.16503	0.00190437	0.0180501
ENSMUSG00000039176	Polg	polymerase (DNA directed), gamma	7.70813	8.3499	6.97511	8.4359	7.34162	8.3929	1.05128	0.00970713	0.0667687
ENSMUSG00000025092	Hspa12a	heat shock protein 12A	6.75944	9.04138	7.66835	9.01507	7.2139	9.02822	1.81433	1.16e-05	0.000223079
ENSMUSG00000022836	Mylk	myosin, light polypeptide kinase	5.82938	8.12489	6.44301	7.64804	6.1362	7.88646	1.75027	6.75e-05	0.00107523
ENSMUSG00000033703	Fuk	fucokinase	4.29429	5.3405	3.38398	5.50307	3.83913	5.42179	1.58265	0.0394577	0.192215
ENSMUSG00000037466	4930427A07Rik	RIKEN cDNA 4930427A07 gene	6.10664	8.8645	6.13387	9.05428	6.12026	8.95939	2.83913	5.85e-17	5.58e-15
ENSMUSG00000031700	Gpt2	glutamic pyruvate transaminase (alanine aminotransferase) 2	5.25705	6.20861	4.87374	6.3814	5.06539	6.295	1.22961	0.0255159	0.139272
ENSMUSG00000023008	Fmnl3	formin-like 3	6.23806	8.22355	6.55989	7.62507	6.39898	7.92431	1.52534	0.00023015	0.0030632
ENSMUSG00000046269	Usp27x	ubiquitin specific peptidase 27, X chromosome	4.71108	6.23796	4.58942	6.1755	4.65025	6.20673	1.55648	0.00592619	0.0449909
ENSMUSG00000039384	Dusp10	dual specificity phosphatase 10	5.12743	6.93775	5.59088	6.8658	5.35916	6.90177	1.54262	0.00178424	0.0171061
ENSMUSG00000045790	Ccdc149	coiled-coil domain containing 149	5.12743	5.76016	5.02081	6.63236	5.07412	6.19626	1.12214	0.0440959	0.207921
ENSMUSG00000089951	Gm14435	predicted gene 14435	0	3.71803	0	3.15702	0	3.43753	3.43753	0.016855	0.102096
ENSMUSG00000041540	Sox5	SRY (sex determining region Y)-box 5	3.70582	6.32259	4.92445	6.07739	4.31513	6.19999	1.88486	0.00625676	0.0468604
ENSMUSG00000024593	Megf10	multiple EGF-like-domains 10	6.03615	8.25977	7.54414	8.4941	6.79015	8.37694	1.58679	0.00635397	0.0474971
ENSMUSG00000114709	AC157650.3	---	2.42795	5.8767	2.05189	4.53454	2.23992	5.20562	2.9657	0.000497777	0.00590778
ENSMUSG00000014837	4931428F04Rik	RIKEN cDNA 4931428F04 gene	8.79638	9.44213	7.86938	9.27321	8.33288	9.35767	1.02479	0.0128967	0.0829404
ENSMUSG00000024261	Syt4	synaptotagmin IV	5.96204	7.36766	6.44301	7.28752	6.20253	7.32759	1.12506	0.0127676	0.082314
ENSMUSG00000082286	Pisd-ps1	phosphatidylserine decarboxylase, pseudogene 1	4.93422	6.29493	5.4595	6.32551	5.19686	6.31022	1.11336	0.0494151	0.225532
ENSMUSG00000023243	Kcnk5	potassium channel, subfamily K, member 5	0	3.87572	0	3.77313	0	3.82443	3.82443	0.00431416	0.0349701
ENSMUSG00000031545	Gpat4	glycerol-3-phosphate acyltransferase 4	8.96397	9.90472	7.98139	9.92713	8.47268	9.91592	1.44324	0.000274149	0.00355754
ENSMUSG00000106847	Peg13	paternally expressed 13	8.67405	9.76554	8.21829	9.76324	8.44617	9.76439	1.31822	2.4e-05	0.000429913
ENSMUSG00000022197	Pdzd2	PDZ domain containing 2	7.10764	8.63002	7.09063	8.18422	7.09914	8.40712	1.30798	0.000266219	0.00346427
ENSMUSG00000038145	Snrk	SNF related kinase	7.61447	8.51485	7.95724	9.37653	7.78586	8.94569	1.15983	0.00267496	0.0237622
ENSMUSG00000038146	Notch3	notch 3	5.93647	6.93775	5.02081	6.96058	5.47864	6.94917	1.47053	0.00569529	0.043578
ENSMUSG00000053166	Cdh22	cadherin 22	6.31946	7.02452	5.68212	7.22779	6.00079	7.12616	1.12537	0.0187642	0.110988
ENSMUSG00000018287	Spag7	sperm associated antigen 7	8.73837	10.0105	8.49065	10.0465	8.61451	10.0285	1.41399	7.91e-07	2.01e-05
ENSMUSG00000036270	Edc4	enhancer of mRNA decapping 4	7.66984	8.44106	7.24823	8.51923	7.45903	8.48015	1.02111	0.00434725	0.0351895
ENSMUSG00000088185	Scarna2	small Cajal body-specific RNA 2	11.5204	14.724	11.2703	15.3357	11.3953	15.0298	3.63449	3.52e-27	8.06e-25
ENSMUSG00000035298	Klhl35	kelch-like 35	2.92066	4.37567	0	4.71938	1.46033	4.54753	3.0872	0.0349904	0.175478
ENSMUSG00000042532	Golga7b	golgi autoantigen, golgin subfamily a, 7B	5.7435	7.39397	4.31317	7.40004	5.02834	7.397	2.36867	3.43e-05	0.000588607
ENSMUSG00000010277	2610507B11Rik	RIKEN cDNA 2610507B11 gene	10.097	10.9546	9.56255	10.9963	9.82978	10.9754	1.14565	0.00026838	0.00348655
ENSMUSG00000032216	Nedd4	neural precursor cell expressed, developmentally down-regulated 4	10.1536	11.7446	10.496	11.6598	10.3248	11.7022	1.37736	3.26e-06	7.19e-05
ENSMUSG00000024251	Thada	thyroid adenoma associated	6.57286	7.43256	5.55914	7.47901	6.066	7.45579	1.38979	0.00608251	0.0458348
ENSMUSG00000024259	Slc25a46	solute carrier family 25, member 46	6.17385	8.98623	7.7123	8.90972	6.94308	8.94798	2.0049	0.000230034	0.0030632
ENSMUSG00000059486	Kbtbd2	kelch repeat and BTB (POZ) domain containing 2	7.4525	8.55621	7.84326	8.80121	7.64788	8.67871	1.03083	0.00420344	0.0342272
ENSMUSG00000055485	Soga1	suppressor of glucose, autophagy associated 1	8.68177	9.67991	8.33066	9.66533	8.50621	9.67262	1.1664	0.000122244	0.00181308
ENSMUSG00000051306	Usp42	ubiquitin specific peptidase 42	7.81725	9.04138	7.5998	8.73839	7.70852	8.88988	1.18136	0.000332471	0.00418863
ENSMUSG00000047284	Neurl4	neuralized E3 ubiquitin protein ligase 4	8.51469	9.27168	7.68315	9.05857	8.09892	9.16513	1.06621	0.00709968	0.0520556
ENSMUSG00000050947	Amigo1	adhesion molecule with Ig like domain 1	7.08454	7.92285	6.79607	8.23819	6.94031	8.08052	1.14021	0.00251722	0.0226191
ENSMUSG00000050945	Zfp438	zinc finger protein 438	4.02985	6.55022	4.76664	6.00807	4.39825	6.27915	1.8809	0.00219504	0.0202863
ENSMUSG00000002342	Tmem161a	transmembrane protein 161A	6.3585	7.36766	5.79544	7.40004	6.07697	7.38385	1.30688	0.00337855	0.0286912
ENSMUSG00000030020	Prickle2	prickle planar cell polarity protein 2	4.37266	6.42821	4.70995	5.81862	4.54131	6.12342	1.58211	0.00790574	0.0566655
ENSMUSG00000039501	Znfx1	zinc finger, NFX1-type containing 1	7.50564	7.98475	6.51095	8.11995	7.0083	8.05235	1.04406	0.0288491	0.152406
ENSMUSG00000048078	Tenm4	teneurin transmembrane protein 4	9.55954	10.4968	9.23608	10.5022	9.39781	10.4995	1.10167	0.000140794	0.00203645
ENSMUSG00000022781	Pak2	p21 protein (Cdc42/Rac)-activated kinase 2	7.79607	9.52185	8.84999	9.56028	8.32303	9.54106	1.21803	0.00655647	0.0487299
ENSMUSG00000028803	Nipal3	NIPA-like domain containing 3	7.13038	8.14826	6.21758	7.99116	6.67398	8.06971	1.39573	0.00186935	0.0177688
ENSMUSG00000020496	Rnf187	ring finger protein 187	9.15902	10.0296	8.28288	10.1706	8.72095	10.1001	1.37913	0.000248284	0.00326362
ENSMUSG00000020142	Slc1a4	solute carrier family 1 (glutamate/neutral amino acid transporter), member 4	5.98717	7.34086	5.73989	7.03216	5.86353	7.18651	1.32298	0.00291959	0.0255368
ENSMUSG00000048814	Lonrf2	LON peptidase N-terminal domain and ring finger 2	7.68528	8.77222	7.51134	8.56219	7.59831	8.6672	1.06889	0.0013261	0.013454
ENSMUSG00000058446	Znrf2	zinc and ring finger 2	6.85809	8.19391	6.668	7.70391	6.76305	7.94891	1.18586	0.0023231	0.0212035
ENSMUSG00000058440	Nrf1	nuclear respiratory factor 1	8.4797	9.54258	7.80318	8.90019	8.14144	9.22139	1.07995	0.00532272	0.0412136
ENSMUSG00000046607	Hrk	harakiri, BCL2 interacting protein (contains only BH3 domain)	4.88159	6.61876	3.06036	6.40855	3.97097	6.51366	2.54268	0.000513283	0.006061
ENSMUSG00000079481	Nhsl2	NHS-like 2	4.58507	5.67688	4.97343	6.29673	4.77925	5.9868	1.20755	0.0462424	0.215046
ENSMUSG00000040389	Wdr47	WD repeat domain 47	5.62042	7.07419	6.27733	6.99682	5.94887	7.0355	1.08663	0.0304151	0.158597
ENSMUSG00000090150	Acad11	acyl-Coenzyme A dehydrogenase family, member 11	4.71108	5.91355	4.70995	5.89741	4.71051	5.90548	1.19496	0.0466722	0.21657
ENSMUSG00000038843	Gcnt1	glucosaminyl (N-acetyl) transferase 1, core 2	2.42795	6.23796	4.23497	5.85855	3.33146	6.04826	2.71679	0.000865131	0.00942984
ENSMUSG00000110243	Gm45631	predicted gene 45631	0	5.04083	1.63118	4.53454	0.81559	4.78768	3.97209	0.0004377	0.00529985
ENSMUSG00000033253	Szt2	seizure threshold 2	7.72316	8.74692	7.59198	8.88577	7.65757	8.81635	1.15877	0.000330984	0.00417666
ENSMUSG00000021959	Lats2	large tumor suppressor 2	6.97575	8.17885	6.96304	8.2306	6.9694	8.20473	1.23533	0.000494042	0.00586643
ENSMUSG00000036550	Cnot1	CCR4-NOT transcription complex, subunit 1	9.21593	10.6696	9.62328	10.6158	9.41961	10.6427	1.22309	7.41e-05	0.00116783
ENSMUSG00000030257	Srgap3	SLIT-ROBO Rho GTPase activating protein 3	11.0833	12.8468	11.2248	12.7129	11.1541	12.7799	1.62579	3.49e-09	1.37e-07
ENSMUSG00000031788	Kifc3	kinesin family member C3	5.45014	6.57343	5.7113	6.69986	5.58072	6.63665	1.05593	0.0349631	0.175379
ENSMUSG00000034573	Ptpn13	protein tyrosine phosphatase, non-receptor type 13	7.07285	8.47842	7.05694	8.02664	7.06489	8.25253	1.18764	0.00119235	0.0122912
ENSMUSG00000021171	Esyt2	extended synaptotagmin-like protein 2	5.62042	7.97607	7.20786	8.25325	6.41414	8.11466	1.70052	0.00519502	0.0404529
ENSMUSG00000042292	Mkl1	MKL (megakaryoblastic leukemia)/myocardin-like 1	6.23806	7.35432	5.31494	6.67771	5.7765	7.01601	1.23951	0.0214302	0.12232
ENSMUSG00000001870	Ltbp1	latent transforming growth factor beta binding protein 1	5.41354	6.93775	4.82118	6.60914	5.11736	6.77345	1.65609	0.00136244	0.013757
ENSMUSG00000021400	Wrnip1	Werner helicase interacting protein 1	7.35934	8.44106	7.23824	8.37526	7.29879	8.40816	1.10937	0.00117365	0.0121511
ENSMUSG00000016253	Nelfcd	negative elongation factor complex member C/D, Th1l	7.55689	9.09449	7.12356	9.04998	7.34023	9.07223	1.73201	1.63e-07	4.75e-06
ENSMUSG00000054843	Atrnl1	attractin like 1	6.84441	9.01195	7.98139	8.99281	7.4129	9.00238	1.58948	0.000636605	0.00728864
ENSMUSG00000085946	AA387200	expressed sequence AA387200	0	2.47503	0	3.59548	0	3.03526	3.03526	0.0456087	0.212989
ENSMUSG00000057716	Tmem178b	transmembrane protein 178B	6.62181	9.46714	7.78271	9.20128	7.20226	9.33421	2.13194	2.25e-06	5.14e-05
ENSMUSG00000039230	Tbcd	tubulin-specific chaperone d	7.04918	8.19391	6.78239	8.06981	6.91579	8.13186	1.21607	0.000890366	0.00966322
ENSMUSG00000035933	Cog5	component of oligomeric golgi complex 5	5.45014	7.2997	5.62194	5.97212	5.53604	6.63591	1.09986	0.0331936	0.168861
ENSMUSG00000097885	5031434O11Rik	RIKEN cDNA 5031434O11 gene	2.09962	4.37567	2.64251	4.62992	2.37106	4.5028	2.13173	0.0352622	0.176538
ENSMUSG00000020231	Dip2a	disco interacting protein 2 homolog A	6.48738	7.92285	6.60722	7.97308	6.5473	7.94797	1.40067	0.000204802	0.00278944
ENSMUSG00000020230	Prmt2	protein arginine N-methyltransferase 2	7.32032	8.53272	6.44301	8.03538	6.88167	8.28405	1.40238	0.00149874	0.0148129
ENSMUSG00000037503	Fam168b	family with sequence similarity 168, member B	10.7606	12.5036	10.7692	12.7044	10.7649	12.604	1.8391	1.4e-11	7.67e-10
ENSMUSG00000075703	Selenoi	selenoprotein I	5.48584	6.82623	6.0219	6.88526	5.75387	6.85574	1.10188	0.0283387	0.15063
ENSMUSG00000041757	Plekha6	pleckstrin homology domain containing, family A member 6	6.03615	7.31355	6.59161	7.77866	6.31388	7.5461	1.23222	0.00660494	0.0489655
ENSMUSG00000051652	Lrrc3	leucine rich repeat containing 3	6.25885	7.87695	4.76664	7.42684	5.51274	7.65189	2.13915	0.000206697	0.00280869
ENSMUSG00000057551	Zfp317	zinc finger protein 317	5.96204	8.309	6.91369	7.79932	6.43787	8.05416	1.6163	0.000752914	0.00839789
ENSMUSG00000089774	Slc5a3	solute carrier family 5 (inositol transporters), member 3	4.51768	7.65558	6.4078	7.55389	5.46274	7.60473	2.14199	0.00185163	0.0176229
ENSMUSG00000079179	Rab10os	RAB10, member RAS oncogene family, opposite strand	7.32032	8.06063	7.11267	8.59801	7.21649	8.32932	1.11283	0.00280105	0.0247101
ENSMUSG00000015488	Cacfd1	calcium channel flower domain containing 1	8.54038	11.136	8.11838	11.1818	8.32938	11.1589	2.82956	9.59e-23	1.51e-20
ENSMUSG00000000561	Wdr77	WD repeat domain 77	7.08454	8.19391	6.59161	7.78903	6.83808	7.99147	1.15339	0.00418241	0.0340797
ENSMUSG00000050244	Heatr1	HEAT repeat containing 1	6.31946	7.69843	6.19711	7.93624	6.25828	7.81734	1.55905	6.83e-05	0.00108579
ENSMUSG00000062232	Rapgef2	Rap guanine nucleotide exchange factor (GEF) 2	6.83059	8.3159	7.42593	7.94554	7.12826	8.13072	1.00246	0.017043	0.103003
ENSMUSG00000041417	Pik3r1	phosphoinositide-3-kinase regulatory subunit 1	9.16729	11.4833	10.523	11.3979	9.84516	11.4406	1.59547	0.00117797	0.0121842
ENSMUSG00000041415	Dicer1	dicer 1, ribonuclease type III	7.63846	9.38425	8.07975	9.18173	7.85911	9.28299	1.42388	2.46e-05	0.000439231
ENSMUSG00000031376	Atp2b3	ATPase, Ca++ transporting, plasma membrane 3	0	4.37567	0	3.93128	0	4.15348	4.15348	0.000915103	0.00986291
ENSMUSG00000022702	Hira	histone cell cycle regulator	8.1024	8.7055	7.25815	8.70593	7.68027	8.70571	1.02544	0.0132364	0.084612
ENSMUSG00000053647	Gper1	G protein-coupled estrogen receptor 1	0	4.14725	0	2.05934	0	3.10329	3.10329	0.0241305	0.134317
ENSMUSG00000038351	Sgsm2	small G protein signaling modulator 2	5.33741	7.38087	5.73989	7.24296	5.53865	7.31192	1.77327	9.05e-05	0.00139036
ENSMUSG00000097530	Kansl2-ps	KAT8 regulatory NSL complex subunit 2, pseudogene	6.39651	6.99044	4.92445	7.46615	5.66048	7.22829	1.56781	0.011565	0.076181
ENSMUSG00000038970	Lmtk2	lemur tyrosine kinase 2	8.39774	9.49779	8.09643	9.44698	8.24708	9.47238	1.2253	5.57e-05	0.000906653
ENSMUSG00000038975	Rabggtb	Rab geranylgeranyl transferase, b subunit	6.3585	8.28108	6.76858	7.96396	6.56354	8.12252	1.55898	7.47e-05	0.00117566
ENSMUSG00000025162	Csnk1d	casein kinase 1, delta	9.1141	10.9468	8.94822	11.0469	9.03116	10.9968	1.96567	4.09e-13	2.74e-11
ENSMUSG00000039004	Bmp6	bone morphogenetic protein 6	0	2.47503	0	3.93128	0	3.20316	3.20316	0.0252215	0.138268
ENSMUSG00000060212	Pcnx2	pecanex homolog 2	3.11558	5.5885	2.86651	5.1638	2.99104	5.37615	2.38511	0.00213415	0.0197784
ENSMUSG00000048895	Cdk5r1	cyclin-dependent kinase 5, regulatory subunit 1 (p35)	9.58445	10.9131	9.11305	11.024	9.34875	10.9685	1.61979	6.82e-08	2.13e-06
ENSMUSG00000104222	Gm7292	predicted gene 7292	7.14161	9.18392	7.53601	9.40039	7.33881	9.29216	1.95335	4.79e-09	1.84e-07
ENSMUSG00000075700	Selenot	selenoprotein T	7.44345	10.9063	9.38156	10.7251	8.41251	10.8157	2.40317	0.0254367	0.138885
ENSMUSG00000032555	Topbp1	topoisomerase (DNA) II binding protein 1	7.75277	9.43582	8.85653	9.30968	8.30465	9.37275	1.0681	0.0245479	0.13581
ENSMUSG00000001366	Fbxo9	f-box protein 9	6.45171	6.91975	5.4595	7.54168	5.95561	7.23072	1.27511	0.0167464	0.10165
ENSMUSG00000024350	Dnajc18	DnaJ heat shock protein family (Hsp40) member C18	8.37887	9.6282	8.17183	9.34173	8.27535	9.48497	1.20962	7.92e-05	0.00123824
ENSMUSG00000005069	Pex5	peroxisomal biogenesis factor 5	7.35934	7.95855	5.92561	7.90797	6.64247	7.93326	1.29079	0.0257154	0.140067
ENSMUSG00000036622	Atp13a2	ATPase type 13A2	7.0372	7.94971	6.80962	8.54394	6.92341	8.24682	1.32341	0.000563114	0.0065631
ENSMUSG00000039621	Prex1	phosphatidylinositol-3,4,5-trisphosphate-dependent Rac exchange factor 1	8.03772	9.18015	8.0343	9.04998	8.03601	9.11506	1.07905	0.000460383	0.00553146
ENSMUSG00000019726	Lyst	lysosomal trafficking regulator	5.37598	7.84869	6.86259	7.67065	6.11929	7.75967	1.64038	0.00660885	0.0489789
ENSMUSG00000029073	Cptp	ceramide-1-phosphate transfer protein	6.69989	7.32727	5.59088	7.65939	6.14539	7.49333	1.34794	0.0105988	0.0714233
ENSMUSG00000020598	Nrcam	neuronal cell adhesion molecule	8.15324	9.63924	8.7375	9.25463	8.44537	9.44693	1.00156	0.00659303	0.0488991
ENSMUSG00000020593	Lpin1	lipin 1	6.87165	7.68784	6.09012	7.76821	6.48088	7.72803	1.24714	0.00554664	0.0425801
ENSMUSG00000020627	Klhl29	kelch-like 29	7.2179	8.51485	7.34447	8.44249	7.28119	8.47867	1.19748	0.000456687	0.00549838
ENSMUSG00000020628	Trappc12	trafficking protein particle complex 12	7.38792	7.89548	6.42552	8.31912	6.90672	8.1073	1.20058	0.0102675	0.0696789
ENSMUSG00000050064	Zfp697	zinc finger protein 697	4.93422	6.59628	5.84892	6.65521	5.39157	6.62574	1.23417	0.0349557	0.175379
ENSMUSG00000024620	Pdgfrb	platelet derived growth factor receptor, beta polypeptide	5.68327	7.16866	5.23684	7.16549	5.46006	7.16707	1.70702	0.000213833	0.00289052
ENSMUSG00000024621	Csf1r	colony stimulating factor 1 receptor	5.45014	6.14806	4.70995	6.74317	5.08005	6.44561	1.36557	0.0168513	0.102096
ENSMUSG00000026667	Uhmk1	U2AF homology motif (UHM) kinase 1	5.62042	8.71597	7.42593	8.2829	6.52317	8.49943	1.97626	0.00180109	0.0172463
ENSMUSG00000029638	Glcci1	glucocorticoid induced transcript 1	8.22365	9.86295	8.65357	9.65969	8.43861	9.76132	1.3227	4.62e-05	0.000769949
ENSMUSG00000040850	Psme4	proteasome (prosome, macropain) activator subunit 4	6.84441	8.70024	8.24348	8.74373	7.54394	8.72199	1.17804	0.0388007	0.189737
ENSMUSG00000026080	Chst10	carbohydrate sulfotransferase 10	6.74479	7.68784	6.83635	8.11995	6.79057	7.9039	1.11333	0.00427079	0.0346998
ENSMUSG00000042404	Dennd4b	DENN/MADD domain containing 4B	6.60568	7.43256	5.76793	7.33075	6.1868	7.38166	1.19485	0.0137451	0.0869825
ENSMUSG00000017692	Rhbdl3	rhomboid, veinlet-like 3 (Drosophila)	8.75675	10.9841	8.27313	10.9311	8.51494	10.9576	2.44265	1.7e-16	1.52e-14
ENSMUSG00000039936	Pik3cd	phosphatidylinositol-4,5-bisphosphate 3-kinase catalytic subunit delta	5.37598	6.34973	4.70995	6.23739	5.04296	6.29356	1.25059	0.0297885	0.156238
ENSMUSG00000056268	Dennd1b	DENN/MADD domain containing 1B	6.37763	8.25977	7.39928	8.0951	6.88846	8.17744	1.28898	0.00801122	0.0572633
ENSMUSG00000032244	Fem1b	feminization 1 homolog b (C. elegans)	8.7604	11.0713	9.46315	11.2004	9.11177	11.1358	2.02407	4.74e-09	1.82e-07
ENSMUSG00000037852	Cpe	carboxypeptidase E	8.91571	10.2544	8.92662	10.2959	8.92116	10.2752	1.354	9.39e-07	2.33e-05
ENSMUSG00000037855	Zfp365	zinc finger protein 365	5.58793	7.5307	5.76793	7.06667	5.67793	7.29868	1.62075	0.000295255	0.00378404
ENSMUSG00000039987	Phtf2	putative homeodomain transcription factor 2	5.48584	7.51879	6.93857	7.58992	6.21221	7.55435	1.34214	0.0330126	0.168312
ENSMUSG00000039985	Fam60a	family with sequence similarity 60, member A	8.09664	9.4038	8.5843	9.57233	8.34047	9.48807	1.1476	0.000756524	0.00841804
ENSMUSG00000039477	Tnrc18	trinucleotide repeat containing 18	9.84717	10.7533	9.09656	10.5578	9.47187	10.6556	1.1837	0.000845136	0.00927148
ENSMUSG00000039474	Wfs1	wolframin ER transmembrane glycoprotein	7.33018	7.85817	6.38987	8.04406	6.86002	7.95112	1.09109	0.0202796	0.11704
ENSMUSG00000024127	Prepl	prolyl endopeptidase-like	6.68461	8.03578	6.74055	7.75769	6.71258	7.89674	1.18416	0.00189248	0.0179667
ENSMUSG00000024122	Pdpk1	3-phosphoinositide dependent protein kinase 1	7.72316	10.5149	8.09089	10.6474	7.90703	10.5812	2.67414	4.18e-19	4.81e-17
ENSMUSG00000026436	Elk4	ELK4, member of ETS oncogene family	8.47082	9.60867	8.64981	9.56632	8.56031	9.5875	1.02718	0.00061748	0.00709055
ENSMUSG00000026121	Sema4c	sema domain, immunoglobulin domain (Ig), transmembrane domain (TM) and short cytoplasmic domain, (semaphorin) 4C	8.18073	10.0127	8.00515	10.0486	8.09294	10.0306	1.93771	7.19e-12	4.08e-10
ENSMUSG00000014355	Anapc1	anaphase promoting complex subunit 1	8.36456	9.68791	8.46519	9.92242	8.41487	9.80517	1.39029	2.57e-06	5.82e-05
ENSMUSG00000009090	Ap1b1	adaptor protein complex AP-1, beta 1 subunit	7.73804	8.58505	7.07949	8.55613	7.40877	8.57059	1.16182	0.00239559	0.021721
ENSMUSG00000019579	Mydgf	myeloid derived growth factor	8.15324	9.24663	7.51961	9.09664	7.83643	9.17163	1.33521	0.000163154	0.00230558
ENSMUSG00000023949	Tcte1	t-complex-associated testis expressed 1	2.09962	4.66215	3.06036	4.88321	2.57999	4.77268	2.19268	0.0244793	0.135612
ENSMUSG00000109807	Gm45244	predicted gene 45244	0	3.54096	0	2.52404	0	3.0325	3.0325	0.0477541	0.220146
ENSMUSG00000066406	Akap13	A kinase (PRKA) anchor protein 13	7.48814	9.10249	8.67224	9.09246	8.08019	9.09747	1.01728	0.0458941	0.213795
ENSMUSG00000026235	Epha4	Eph receptor A4	5.93647	8.96883	7.39029	8.7649	6.66338	8.86687	2.20349	2.44e-05	0.000435281
ENSMUSG00000038664	Herc1	HECT and RLD domain containing E3 ubiquitin protein ligase family member 1	8.01957	10.0586	9.27812	10.0115	8.64885	10.035	1.3862	0.00406591	0.0332931
ENSMUSG00000008435	Rdh13	retinol dehydrogenase 13 (all-trans and 9-cis)	6.25885	7.56584	5.97455	7.19698	6.1167	7.38141	1.26471	0.00327284	0.027987
ENSMUSG00000046572	Zfp518b	zinc finger protein 518B	7.32032	9.03721	8.16129	8.69494	7.74081	8.86607	1.12527	0.00852184	0.0601943
ENSMUSG00000102440	Pcdhga9	protocadherin gamma subfamily A, 9	3.11558	4.90105	3.23123	5.89741	3.1734	5.39923	2.22583	0.00333879	0.0284364
ENSMUSG00000045005	Fzd5	frizzled class receptor 5	10.2121	11.5061	10.5251	11.4722	10.3686	11.4892	1.1206	0.000149906	0.00214434
ENSMUSG00000042055	Wdr11	WD repeat domain 11	6.81664	8.03578	6.71197	7.77866	6.7643	7.90722	1.14292	0.00252673	0.0226784
ENSMUSG00000034951	Cog7	component of oligomeric golgi complex 7	7.24939	8.88319	6.25769	8.44904	6.75354	8.66612	1.91258	1.12e-05	0.000217344
ENSMUSG00000078517	Emc1	ER membrane protein complex subunit 1	7.86548	8.89245	6.96304	8.82156	7.41426	8.857	1.44275	0.000403832	0.00493326
ENSMUSG00000046962	Zbtb21	zinc finger and BTB domain containing 21	6.77396	8.14826	6.49427	7.75769	6.63411	7.95298	1.31887	0.000698434	0.0078806
ENSMUSG00000026571	Dcaf6	DDB1 and CUL4 associated factor 6	6.08353	8.3962	6.84953	7.76821	6.46653	8.08221	1.61568	0.000379279	0.00467374
ENSMUSG00000037119	Fam91a1	family with sequence similarity 91, member A1	6.25885	8.95565	7.4171	9.05428	6.83797	9.00496	2.16699	2.09e-06	4.83e-05
ENSMUSG00000037110	Ralgapa2	Ral GTPase activating protein, alpha subunit 2 (catalytic)	5.85691	7.4452	6.84953	8.19205	6.35322	7.81863	1.46541	0.00426034	0.0346301
ENSMUSG00000037172	E330009J07Rik	RIKEN cDNA E330009J07 gene	6.39651	7.94971	7.17682	7.76821	6.78667	7.85896	1.07229	0.0203672	0.1174
ENSMUSG00000038250	Usp38	ubiquitin specific peptidase 38	5.68327	7.55422	6.44301	7.21247	6.06314	7.38334	1.3202	0.00694257	0.0511275
ENSMUSG00000038252	Ncapd2	non-SMC condensin I complex, subunit D2	10.1838	11.1035	9.84678	11.0262	10.0153	11.0648	1.04955	0.000291384	0.00374167
ENSMUSG00000052056	Zfp217	zinc finger protein 217	6.43355	7.84869	6.29671	7.47901	6.36513	7.66385	1.29872	0.00127495	0.0130308
ENSMUSG00000037991	Rmi2	RecQ mediated genome instability 2	5.85691	8.17885	5.4247	8.13629	5.6408	8.15757	2.51677	1.59e-10	7.57e-09
ENSMUSG00000037995	Igsf9	immunoglobulin superfamily, member 9	9.01373	10.9513	8.67224	11.0821	8.84299	11.0167	2.17367	1.87e-14	1.46e-12
ENSMUSG00000034471	Caskin2	CASK-interacting protein 2	7.27002	8.29511	6.47738	8.14439	6.8737	8.21975	1.34605	0.00137038	0.0138252
ENSMUSG00000021745	Ptprg	protein tyrosine phosphatase, receptor type, G	7.47043	9.02042	8.24846	8.74373	7.85945	8.88208	1.02263	0.0140591	0.0885853
ENSMUSG00000021738	Atxn7	ataxin 7	6.53927	7.85817	5.92561	7.25797	6.23244	7.55807	1.32563	0.00348325	0.0294198
ENSMUSG00000027353	Mcm8	minichromosome maintenance 8 homologous recombination repair factor	3.92972	5.83889	4.65094	6.26736	4.29033	6.05313	1.7628	0.0061418	0.0461666
ENSMUSG00000037432	Fer1l5	fer-1-like 5 (C. elegans)	3.44067	5.04083	2.86651	4.71938	3.15359	4.88011	1.72651	0.0475167	0.219615
ENSMUSG00000023075	Akirin1	akirin 1	7.46149	8.42838	6.75463	8.34746	7.10806	8.38792	1.27986	0.0012959	0.0131867
ENSMUSG00000073609	D2hgdh	D-2-hydroxyglutarate dehydrogenase	6.08353	7.68784	5.19615	7.44006	5.63984	7.56395	1.92411	5.55e-05	0.00090576
ENSMUSG00000073600	Prob1	proline rich basic protein 1	5.65219	5.98453	4.23497	7.31648	4.94358	6.65051	1.70693	0.0101709	0.069294
ENSMUSG00000034853	Acot11	acyl-CoA thioesterase 11	4.29429	7.02452	5.02081	6.84607	4.65755	6.9353	2.27775	1.82e-05	0.000336517
ENSMUSG00000035107	Dcbld2	discoidin, CUB and LCCL domain containing 2	5.52068	8.53863	6.71197	8.08672	6.11632	8.31267	2.19635	1.09e-05	0.000211284
ENSMUSG00000006215	Zbtb17	zinc finger and BTB domain containing 17	7.48814	8.23815	6.51095	7.95478	6.99955	8.09646	1.09692	0.0197571	0.115066
ENSMUSG00000059713	Rcan3	regulator of calcineurin 3	6.01187	7.34086	4.52516	7.91746	5.26851	7.62916	2.36064	4.37e-05	0.000734956
ENSMUSG00000091264	Smim13	small integral membrane protein 13	7.55689	9.11441	8.35397	8.98832	7.95543	9.05136	1.09593	0.00730929	0.0532404
ENSMUSG00000038437	Mllt6	myeloid/lymphoid or mixed-lineage leukemia; translocated to, 6	9.35515	10.2436	8.64225	10.2365	8.9987	10.2401	1.24136	0.000332406	0.00418863
ENSMUSG00000001768	Rin2	Ras and Rab interactor 2	5.7435	7.09037	6.37171	7.11692	6.05761	7.10365	1.04604	0.0335363	0.170271
ENSMUSG00000020899	Pfas	phosphoribosylformylglycinamidine synthase (FGAR amidotransferase)	7.63846	8.77723	7.4607	8.73839	7.54958	8.75781	1.20823	0.000199792	0.00272874
ENSMUSG00000039741	Bahcc1	BAH domain and coiled-coil containing 1	9.21593	10.6383	8.85327	10.499	9.0346	10.5687	1.53408	1.31e-07	3.85e-06
ENSMUSG00000039740	Alg2	asparagine-linked glycosylation 2 (alpha-1,3-mannosyltransferase)	8.22365	9.34769	7.54414	9.15392	7.8839	9.25081	1.36691	0.000143013	0.00206089
ENSMUSG00000039747	Orai2	ORAI calcium release-activated calcium modulator 2	5.48584	7.69843	6.69746	7.4135	6.09165	7.55597	1.46432	0.00888894	0.0622412
ENSMUSG00000034839	Larp6	La ribonucleoprotein domain family, member 6	5.93647	7.07419	4.92445	6.8658	5.43046	6.96999	1.53953	0.00480372	0.0380661
ENSMUSG00000025949	Pikfyve	phosphoinositide kinase, FYVE type zinc finger containing	6.17385	8.00197	6.98709	7.76821	6.58047	7.88509	1.30462	0.00469413	0.0374008
ENSMUSG00000048307	Ankrd46	ankyrin repeat domain 46	7.74543	8.34317	6.98709	8.63297	7.36626	8.48807	1.12181	0.00613409	0.0461342
ENSMUSG00000062127	Cttnbp2nl	CTTNBP2 N-terminal like	7.4525	8.99486	8.37235	8.95647	7.91243	8.97567	1.06324	0.0154985	0.0957177
ENSMUSG00000052302	Tbc1d30	TBC1 domain family, member 30	7.04918	8.09312	6.63793	8.00011	6.84356	8.04661	1.20306	0.0016159	0.0157838
ENSMUSG00000110127	6430710M23Rik	RIKEN cDNA 6430710M23 gene	0	3.71803	0	2.52404	0	3.12104	3.12104	0.0357216	0.178341
ENSMUSG00000020707	Rnf135	ring finger protein 135	0	3.54096	0	3.93128	0	3.73612	3.73612	0.00596337	0.0451703
ENSMUSG00000020704	Asic2	acid-sensing (proton-gated) ion channel 2	5.0815	6.32259	3.38398	6.32551	4.23274	6.32405	2.09131	0.0049077	0.0386931
ENSMUSG00000028284	Map3k7	mitogen-activated protein kinase kinase kinase 7	8.0497	9.6282	9.04593	9.69043	8.54782	9.65932	1.1115	0.011198	0.0744568
ENSMUSG00000090307	1700071M16Rik	RIKEN cDNA 1700071M16 gene	0	3.33908	0	3.39284	0	3.36596	3.36596	0.0223522	0.126341
ENSMUSG00000103039	Gm37123	predicted gene, 37123	3.11558	5.22799	3.97119	5.34338	3.54338	5.28569	1.7423	0.0313509	0.162408
ENSMUSG00000032127	Vps11	VPS11, CORVET/HOPS core subunit	7.61447	8.52083	7.13437	8.26072	7.37442	8.39077	1.01635	0.00649012	0.0483137
ENSMUSG00000032122	Slc37a2	solute carrier family 37 (glycerol-3-phosphate transporter), member 2	0	2.47503	0	3.77313	0	3.12408	3.12408	0.0338025	0.171027
ENSMUSG00000074825	Itpripl1	inositol 1,4,5-triphosphate receptor interacting protein-like 1	5.88392	7.24292	5.87494	7.68182	5.87943	7.46237	1.58294	0.000221747	0.00297511
ENSMUSG00000026708	Cenpl	centromere protein L	6.43355	7.47015	5.35246	7.08361	5.893	7.27688	1.38388	0.00997838	0.0684011
ENSMUSG00000070565	Rasal2	RAS protein activator like 2	6.06003	8.64105	7.86938	8.6156	6.96471	8.62832	1.66362	0.0105782	0.0713101
ENSMUSG00000046442	Ppm1e	protein phosphatase 1E (PP2C domain containing)	5.62042	7.22837	6.93857	7.82977	6.2795	7.52907	1.24958	0.0387451	0.189504
ENSMUSG00000055368	Slc6a2	solute carrier family 6 (neurotransmitter transporter, noradrenalin), member 2	3.70582	6.70536	2.64251	6.69986	3.17416	6.70261	3.52845	1.45e-08	5.21e-07
ENSMUSG00000051339	2900026A02Rik	RIKEN cDNA 2900026A02 gene	8.48853	9.77558	8.0458	10.0312	8.26716	9.90342	1.63625	1.92e-07	5.5e-06
ENSMUSG00000018076	Med13l	mediator complex subunit 13-like	9.20259	10.4188	9.15877	10.2193	9.18068	10.3191	1.13842	5.24e-05	0.00086164
ENSMUSG00000061130	Ppm1b	protein phosphatase 1B, magnesium dependent, beta isoform	8.09085	10.1052	8.55241	9.89148	8.32163	9.99832	1.67669	1.99e-07	5.67e-06
ENSMUSG00000049313	Sorl1	sortilin-related receptor, LDLR class A repeats-containing	5.0815	5.98453	5.02081	6.56155	5.05115	6.27304	1.22188	0.0257562	0.140193
ENSMUSG00000029189	Sel1l3	sel-1 suppressor of lin-12-like 3 (C. elegans)	8.23943	9.10249	7.16632	9.42054	7.70288	9.26152	1.55864	0.000299502	0.00382488
ENSMUSG00000029186	Pi4k2b	phosphatidylinositol 4-kinase type 2 beta	2.69524	5.49435	4.15229	5.77755	3.42376	5.63595	2.21219	0.00791985	0.0567318
ENSMUSG00000034663	Bmp2k	BMP2 inducible kinase	6.33911	7.74006	7.13437	7.82977	6.73674	7.78492	1.04817	0.0258111	0.140424
ENSMUSG00000032625	Thsd7a	thrombospondin, type I, domain containing 7A	6.53927	8.06882	7.06826	7.71483	6.80376	7.89182	1.08806	0.0100159	0.0685693
ENSMUSG00000032086	Bace1	beta-site APP cleaving enzyme 1	7.29035	9.19144	8.44796	9.28791	7.86915	9.23968	1.37052	0.00372649	0.0310696
ENSMUSG00000020132	Rab21	RAB21, member RAS oncogene family	6.50488	8.00197	6.668	7.73642	6.58644	7.86919	1.28275	0.000937304	0.010056
ENSMUSG00000029840	Mtpn	myotrophin	8.37887	10.5416	9.52607	10.4927	8.95247	10.5172	1.56468	0.00041708	0.00508181
ENSMUSG00000019235	Rps6kl1	ribosomal protein S6 kinase-like 1	4.29429	6.14806	5.27642	6.23739	4.78535	6.19272	1.40737	0.0306386	0.159442
ENSMUSG00000065922	n-R5-8s1	nuclear encoded rRNA 5.8S 1	10.6161	12.6102	10.4739	11.9406	10.545	12.2754	1.73043	6.44e-08	2.03e-06
ENSMUSG00000014778	Fhod1	formin homology 2 domain containing 1	5.7727	6.45346	4.87374	7.0146	5.32322	6.73403	1.41081	0.0116919	0.0768652
ENSMUSG00000039068	Zzz3	zinc finger, ZZ domain containing 3	7.67758	9.55138	8.61935	9.57233	8.14847	9.56186	1.41339	0.000640599	0.0073236
ENSMUSG00000025512	Chid1	chitinase domain containing 1	5.88392	7.02452	5.59088	7.72566	5.7374	7.37509	1.63769	0.000336506	0.00423261
ENSMUSG00000056310	Tyw1	tRNA-yW synthesizing protein 1 homolog (S. cerevisiae)	5.98717	7.25733	5.62194	7.11692	5.80456	7.18712	1.38257	0.00203418	0.0191075
ENSMUSG00000023827	Agpat4	1-acylglycerol-3-phosphate O-acyltransferase 4 (lysophosphatidic acid acyltransferase, delta)	5.21512	8.3962	6.06773	8.65014	5.64143	8.52317	2.88174	1.64e-11	8.94e-10
ENSMUSG00000021375	Kif13a	kinesin family member 13A	8.23419	9.74268	8.64604	9.46001	8.44011	9.60135	1.16124	0.000452736	0.00546072
ENSMUSG00000038838	Vars2	valyl-tRNA synthetase 2, mitochondrial	5.7727	7.00758	5.90049	7.21247	5.8366	7.11002	1.27343	0.00448261	0.0360601
ENSMUSG00000038831	Ralgps1	Ral GEF with PH domain and SH3 binding motif 1	7.40667	8.46608	7.22818	8.59801	7.31743	8.53204	1.21462	0.000336083	0.00422958
ENSMUSG00000022885	St6gal1	beta galactoside alpha 2,6 sialyltransferase 1	7.85186	9.21007	7.57621	9.12965	7.71403	9.16986	1.45583	3.28e-06	7.22e-05
ENSMUSG00000052949	Rnf157	ring finger protein 157	9.3956	10.6356	8.82017	10.5533	9.10788	10.5944	1.48653	2.7e-06	6.08e-05
ENSMUSG00000107560	Gm44199	predicted gene, 44199	0	3.54096	0	2.87497	0	3.20797	3.20797	0.0329322	0.168044
ENSMUSG00000036698	Ago2	argonaute RISC catalytic subunit 2	9.11979	10.3177	9.24858	10.1181	9.18419	10.2179	1.03371	0.000357013	0.00445348
ENSMUSG00000090958	Lrrc32	leucine rich repeat containing 32	0	4.14725	0	3.59548	0	3.87136	3.87136	0.00332311	0.0283442
ENSMUSG00000021448	Shc3	src homology 2 domain-containing transforming protein C3	5.45014	7.62258	5.73989	7.49176	5.59502	7.55717	1.96215	4.46e-06	9.49e-05
ENSMUSG00000039879	Heca	hdc homolog, cell cycle regulator	5.7727	7.90466	7.53601	8.19205	6.65435	8.04836	1.394	0.0448198	0.210315
ENSMUSG00000030930	Chst15	carbohydrate (N-acetylgalactosamine 4-sulfate 6-O) sulfotransferase 15	5.17194	6.47826	5.19615	7.35886	5.18404	6.91856	1.73452	0.000591318	0.00684059
ENSMUSG00000104148	Pcdha2	protocadherin alpha 2	0	4.14725	2.37721	5.3986	1.18861	4.77292	3.58432	0.0029095	0.0254581
ENSMUSG00000036529	Sbf1	SET binding factor 1	8.06748	9.35775	7.7195	9.37653	7.89349	9.36714	1.47365	2.12e-06	4.89e-05
ENSMUSG00000049295	Zfp219	zinc finger protein 219	8.86916	9.72466	8.395	9.71783	8.63208	9.72124	1.08916	0.000618832	0.00710257
ENSMUSG00000030203	Dusp16	dual specificity phosphatase 16	7.3104	9.18769	8.18748	9.52969	7.74894	9.35869	1.60975	8.17e-05	0.00127041
ENSMUSG00000030201	Lrp6	low density lipoprotein receptor-related protein 6	7.83119	9.9564	8.88562	9.92007	8.35841	9.93823	1.57983	0.000214402	0.00289486
ENSMUSG00000030207	Fam234b	family with sequence similarity 234, member B	7.08454	8.23087	6.87554	8.5378	6.98004	8.38434	1.4043	8.39e-05	0.00130072
ENSMUSG00000024597	Slc12a2	solute carrier family 12, member 2	4.82696	7.48246	6.78239	7.92688	5.80467	7.70467	1.9	0.00838626	0.0594165
ENSMUSG00000022305	Lrp12	low density lipoprotein-related protein 12	8.39304	9.23939	7.82336	9.18958	8.1082	9.21449	1.10629	0.00132861	0.0134638
ENSMUSG00000035181	Heatr5a	HEAT repeat containing 5A	5.7727	7.72976	6.49427	7.74709	6.13348	7.73843	1.60495	0.000372737	0.00460643
ENSMUSG00000021143	Pacs2	phosphofurin acidic cluster sorting protein 2	10.2121	11.2129	8.70886	10.9612	9.46046	11.087	1.62657	0.00128984	0.0131433
ENSMUSG00000021140	Pcnx	pecanex homolog (Drosophila)	8.3306	9.86765	8.49904	9.88182	8.41482	9.87474	1.45991	4.77e-07	1.27e-05
ENSMUSG00000021147	Wdr37	WD repeat domain 37	5.98717	7.87695	7.33513	7.80954	6.66115	7.84325	1.18209	0.0473571	0.219008
ENSMUSG00000040649	Rimklb	ribosomal modification protein rimK-like family member B	7.80317	9.56302	8.395	9.45351	8.09909	9.50826	1.40918	5.83e-05	0.000943824
ENSMUSG00000026321	Tnfrsf11a	tumor necrosis factor receptor superfamily, member 11a, NFKB activator	3.11558	5.67688	3.38398	5.03031	3.24978	5.3536	2.10382	0.00597595	0.0451852
ENSMUSG00000061410	Zcchc14	zinc finger, CCHC domain containing 14	8.70846	10.0421	8.64981	10.0421	8.67913	10.0421	1.36298	1.02e-06	2.51e-05
ENSMUSG00000049489	Fam58b	family with sequence similarity 58, member B	6.19557	7.48246	5.27642	7.40004	5.736	7.44125	1.70525	0.000482036	0.00575314
ENSMUSG00000041258	Zfp236	zinc finger protein 236	8.10814	9.69322	8.31649	9.30246	8.21231	9.49784	1.28552	5.61e-05	0.000911396
ENSMUSG00000038119	Cdon	cell adhesion molecule-related/down-regulated by oncogenes	8.69708	10.1386	9.1428	10.0378	8.91994	10.0882	1.16826	0.000271575	0.0035261
ENSMUSG00000038112	AW551984	expressed sequence AW551984	0	3.33908	0	3.93128	0	3.63518	3.63518	0.0084002	0.0594972
ENSMUSG00000020781	Tsen54	tRNA splicing endonuclease subunit 54	3.28726	5.71912	4.97343	6.11084	4.13035	5.91498	1.78463	0.0334093	0.169774
ENSMUSG00000048371	Pdp2	pyruvate dehyrogenase phosphatase catalytic subunit 2	6.33911	8.50281	6.60722	8.48775	6.47317	8.49528	2.02211	1.49e-08	5.36e-07
ENSMUSG00000039242	B3galnt2	UDP-GalNAc:betaGlcNAc beta 1,3-galactosaminyltransferase, polypeptide 2	3.70582	7.1222	5.7113	7.0146	4.70856	7.0684	2.35984	0.00149291	0.0147928
ENSMUSG00000053110	Yap1	yes-associated protein 1	8.01347	9.17257	8.11292	9.34876	8.0632	9.26066	1.19747	0.000101083	0.00152984
ENSMUSG00000027253	Lrp4	low density lipoprotein receptor-related protein 4	8.03772	9.50686	8.29738	9.4105	8.16755	9.45868	1.29113	2.99e-05	0.000523482
ENSMUSG00000037572	Wdhd1	WD repeat and HMG-box DNA binding protein 1	6.89839	9.11836	7.78271	8.97929	7.34055	9.04883	1.70828	3.24e-05	0.000558817
ENSMUSG00000042873	Lhfpl4	lipoma HMGIC fusion partner-like protein 4	9.74775	11.7344	9.28784	11.705	9.51779	11.7197	2.20186	4.76e-14	3.56e-12
ENSMUSG00000007440	Pcdha11	protocadherin alpha 11	0	2.01431	0	4.88321	0	3.44876	3.44876	0.00413362	0.033741
ENSMUSG00000034792	Gna15	guanine nucleotide binding protein, alpha 15	0	2.8237	0	3.39284	0	3.10827	3.10827	0.0437787	0.206676
ENSMUSG00000028431	Ikbkap	inhibitor of kappa light polypeptide enhancer in B cells, kinase complex-associated protein	6.92464	8.38968	7.38124	8.50672	7.15294	8.4482	1.29526	0.000524272	0.00617826
ENSMUSG00000028436	Dcaf12	DDB1 and CUL4 associated factor 12	8.15878	10.3633	7.81666	10.3772	7.98772	10.3702	2.38252	1.28e-16	1.17e-14
ENSMUSG00000028439	Fam219a	family with sequence similarity 219, member A	8.11385	9.66107	7.04553	9.18566	7.57969	9.42337	1.84368	1.53e-05	0.000287671
ENSMUSG00000078515	Ddi2	DNA-damage inducible protein 2	7.46149	8.83599	8.16129	9.19349	7.81139	9.01474	1.20335	0.00233675	0.0212925
ENSMUSG00000032796	Lama1	laminin, alpha 1	7.93169	9.39079	7.69049	9.44041	7.81109	9.4156	1.60451	1.09e-07	3.26e-06
ENSMUSG00000041720	Pi4ka	phosphatidylinositol 4-kinase alpha	8.36456	9.44213	8.31649	9.56933	8.34052	9.50573	1.16521	7.72e-05	0.00121018
ENSMUSG00000033949	Trim36	tripartite motif-containing 36	5.29779	6.82623	6.13387	6.78521	5.71583	6.80572	1.08989	0.0496629	0.226177
ENSMUSG00000033948	Zswim5	zinc finger SWIM-type containing 5	8.18617	9.48254	7.56826	9.35923	7.87721	9.42089	1.54368	6.33e-06	0.000130761
ENSMUSG00000053460	Ggcx	gamma-glutamyl carboxylase	5.37598	6.23796	4.87374	6.3814	5.12486	6.30968	1.18482	0.0331228	0.168653
ENSMUSG00000034684	Sema3f	sema domain, immunoglobulin domain (Ig), short basic domain, secreted, (semaphorin) 3F	8.34525	9.23939	7.76195	9.03698	8.0536	9.13819	1.08459	0.00209916	0.019555
ENSMUSG00000107263	Gm42471	predicted gene 42471	0	2.8237	0	3.39284	0	3.10827	3.10827	0.0437787	0.206676
ENSMUSG00000031328	Flna	filamin, alpha	8.95126	10.3466	9.19795	10.3085	9.0746	10.3276	1.25296	1.63e-05	0.000304397
ENSMUSG00000029104	Htt	huntingtin	8.30085	9.4231	7.80994	9.31328	8.05539	9.36819	1.31279	6.11e-05	0.000983584
ENSMUSG00000029101	Rgs12	regulator of G-protein signaling 12	8.25503	9.10249	7.2875	8.79093	7.77126	8.94671	1.17545	0.00618283	0.0463961
ENSMUSG00000020422	Tns3	tensin 3	8.12522	9.75034	7.63829	9.93415	7.88175	9.84225	1.96049	5.67e-10	2.48e-08
ENSMUSG00000049807	Arhgap23	Rho GTPase activating protein 23	8.22365	9.7064	7.60758	9.56028	7.91562	9.63334	1.71772	3.11e-07	8.55e-06
ENSMUSG00000023994	Nfya	nuclear transcription factor-Y alpha	7.28022	8.29511	7.1451	8.38896	7.21266	8.34203	1.12937	0.0011327	0.0117891
ENSMUSG00000024420	Zfp521	zinc finger protein 521	7.76008	9.1223	7.98737	9.11736	7.87372	9.11983	1.24611	8.6e-05	0.00132854
ENSMUSG00000049119	Fam110b	family with sequence similarity 110, member B	5.52068	6.52663	3.06036	6.80578	4.29052	6.66621	2.37569	0.00711044	0.0521172
ENSMUSG00000032913	Lrig2	leucine-rich repeats and immunoglobulin-like domains 2	6.41515	8.01897	7.01075	7.67065	6.71295	7.84481	1.13186	0.00913402	0.0635949
ENSMUSG00000070738	Dgkd	diacylglycerol kinase, delta	9.34303	10.1996	8.4349	10.0203	8.88897	10.1099	1.22096	0.00163958	0.0159617
ENSMUSG00000070733	Fryl	FRY like transcription coactivator	7.97001	9.4764	8.63466	9.16591	8.30234	9.32115	1.01882	0.0076651	0.0552801
ENSMUSG00000104252	Pcdha4	protocadherin alpha 4	0	4.57283	2.86651	5.22618	1.43326	4.8995	3.46625	0.00776806	0.0559017
ENSMUSG00000046658	Zfp316	zinc finger protein 316	7.63051	8.22355	6.98709	8.51923	7.3088	8.37139	1.06259	0.00757849	0.054757
ENSMUSG00000008153	Clstn3	calsyntenin 3	5.7727	6.80678	5.84892	6.97881	5.81081	6.89279	1.08198	0.0198549	0.115415
ENSMUSG00000070462	Tlnrd1	talin rod domain containing 1	7.00065	7.79045	6.35332	8.15244	6.67699	7.97145	1.29446	0.00211358	0.0196502
ENSMUSG00000040372	Gpr63	G protein-coupled receptor 63	4.44699	5.83889	3.06036	5.28597	3.75368	5.56243	1.80875	0.0264843	0.143153
ENSMUSG00000031549	Ido2	indoleamine 2,3-dioxygenase 2	0	3.54096	0	2.52404	0	3.0325	3.0325	0.0477541	0.220146
ENSMUSG00000070583	Fv1	Friend virus susceptibility 1	3.70582	6.08485	4.82118	6.14353	4.2635	6.11419	1.85069	0.00691418	0.0509828
ENSMUSG00000013076	Amotl1	angiomotin-like 1	7.39733	8.99055	7.90138	9.03263	7.64935	9.01159	1.36224	0.0001127	0.00168545
ENSMUSG00000018334	Ksr1	kinase suppressor of ras 1	7.32032	8.36993	7.10169	8.06128	7.21101	8.2156	1.00459	0.00572267	0.0437106
ENSMUSG00000033222	Ttf2	transcription termination factor, RNA polymerase II	7.34968	8.36328	6.98709	8.30474	7.16839	8.33401	1.16563	0.00117494	0.0121582
ENSMUSG00000037259	Dzank1	double zinc ribbon and ankyrin repeat domains 1	3.92972	7.70895	6.045	7.62507	4.98736	7.66701	2.67966	0.000159005	0.00225651
ENSMUSG00000037253	Mex3c	mex3 RNA binding family member C	7.66984	9.21007	8.2081	8.95187	7.93897	9.08097	1.142	0.00163693	0.0159425
ENSMUSG00000022387	Brd1	bromodomain containing 1	8.61079	9.82477	8.64981	9.5633	8.6303	9.69404	1.06374	0.00034825	0.00435889
ENSMUSG00000022382	Wnt7b	wingless-type MMTV integration site family, member 7B	5.0815	6.20861	3.38398	6.1755	4.23274	6.19206	1.95932	0.0106538	0.071642
ENSMUSG00000039367	Sec24c	Sec24 related gene family, member C (S. cerevisiae)	8.21836	9.31708	7.96332	9.4105	8.09084	9.36379	1.27295	3e-05	0.000523551
ENSMUSG00000070802	Pnmal2	PNMA-like 2	8.32569	8.93339	7.81666	9.24336	8.07117	9.08838	1.0172	0.00371458	0.0309924
ENSMUSG00000034501	Pcnx4	pecanex homolog 4	4.88159	7.22837	5.90049	7.42684	5.39104	7.32761	1.93657	0.000247322	0.00325281
ENSMUSG00000035678	Tnfsf9	tumor necrosis factor (ligand) superfamily, member 9	5.7137	6.40252	4.82118	6.48708	5.26744	6.4448	1.17736	0.0450671	0.211263
ENSMUSG00000035671	Zswim4	zinc finger SWIM-type containing 4	9.1141	10.0851	8.46519	9.96191	8.78965	10.0235	1.23387	0.000267378	0.0034774
ENSMUSG00000022414	Tab1	TGF-beta activated kinase 1/MAP3K7 binding protein 1	6.71501	8.01897	6.75463	7.80954	6.73482	7.91426	1.17944	0.00176985	0.016996
ENSMUSG00000024270	Slc39a6	solute carrier family 39 (metal ion transporter), member 6	8.00119	9.46403	7.77582	9.4105	7.8885	9.43727	1.54877	2.44e-07	6.83e-06
ENSMUSG00000042978	Sbk1	SH3-binding kinase 1	11.2115	12.2482	10.5148	12.1166	10.8631	12.1824	1.31928	0.000102186	0.00154304
ENSMUSG00000020246	Hcfc2	host cell factor C2	5.21512	7.82953	6.52745	7.76821	5.87129	7.79887	1.92759	0.000440881	0.00532731
ENSMUSG00000028901	Gmeb1	glucocorticoid modulatory element binding protein 1	8.07922	9.95198	8.69432	9.80471	8.38677	9.87835	1.49158	1.68e-05	0.000313384
ENSMUSG00000031227	Magee1	melanoma antigen, family E, 1	6.15179	7.89548	5.35246	7.38644	5.75213	7.64096	1.88884	5.76e-05	0.00093456
ENSMUSG00000002897	Il17ra	interleukin 17 receptor A	4.93422	6.1168	4.23497	5.85855	4.5846	5.98768	1.40308	0.025908	0.140689
ENSMUSG00000040125	Gpr26	G protein-coupled receptor 26	4.37266	6.32259	5.76793	7.03216	5.0703	6.67738	1.60708	0.017028	0.102957
ENSMUSG00000066640	Fbxl18	F-box and leucine-rich repeat protein 18	7.57358	9.15728	6.19711	9.31686	6.88534	9.23707	2.35173	6.24e-07	1.62e-05
ENSMUSG00000024219	Anks1	ankyrin repeat and SAM domain containing 1	7.93169	9.04138	7.48624	9.34173	7.70897	9.19155	1.48259	1.05e-05	0.000203836
ENSMUSG00000019850	Tnfaip3	tumor necrosis factor, alpha-induced protein 3	0	4.82573	0	3.77313	0	4.29943	4.29943	0.000344338	0.00431717
ENSMUSG00000033389	Arhgap44	Rho GTPase activating protein 44	6.25885	7.48246	5.38903	7.40004	5.82394	7.44125	1.61731	0.000779718	0.00864727
ENSMUSG00000048489	8430408G22Rik	RIKEN cDNA 8430408G22 gene	0	2.8237	0	3.93128	0	3.37749	3.37749	0.0172325	0.10371
ENSMUSG00000097078	Gm26566	predicted gene, 26566	2.09962	4.57283	3.23123	5.97212	2.66542	5.27247	2.60705	0.00254527	0.0228185
ENSMUSG00000031833	Mast3	microtubule associated serine/threonine kinase 3	7.04918	8.78222	6.4603	8.71139	6.75474	8.7468	1.99206	4.29e-08	1.41e-06
ENSMUSG00000031835	Mbtps1	membrane-bound transcription factor peptidase, site 1	9.40028	10.1249	8.6155	10.1304	9.00789	10.1277	1.11978	0.00210468	0.0195752
ENSMUSG00000025997	Ikzf2	IKAROS family zinc finger 2	4.82696	7.02452	6.21758	7.0146	5.52227	7.01956	1.49729	0.0194471	0.113978
ENSMUSG00000021061	Sptb	spectrin beta, erythrocytic	8.26534	9.5543	7.56026	9.32044	7.9128	9.43737	1.52457	2.04e-05	0.000371086
ENSMUSG00000005483	Dnajb1	DnaJ heat shock protein family (Hsp40) member B1	8.81053	9.87934	8.10195	10.089	8.45624	9.98419	1.52795	1.09e-05	0.000211456
ENSMUSG00000040455	Usp45	ubiquitin specific petidase 45	4.88159	6.90153	6.17633	7.03216	5.52896	6.96685	1.43789	0.0214619	0.122461
ENSMUSG00000040451	Sgms1	sphingomyelin synthase 1	5.29779	6.64091	6.11216	7.0146	5.70497	6.82775	1.12278	0.0414582	0.199308
ENSMUSG00000026409	Pfkfb2	6-phosphofructo-2-kinase/fructose-2,6-biphosphatase 2	4.82696	7.85817	6.045	8.03538	5.43598	7.94677	2.5108	9.86e-07	2.43e-05
ENSMUSG00000007646	Rad51c	RAD51 paralog C	5.21512	7.02452	5.27642	6.80578	5.24577	6.91515	1.66938	0.000458686	0.00551676
ENSMUSG00000031381	Piga	phosphatidylinositol glycan anchor biosynthesis, class A	5.0815	7.27159	6.4603	6.92341	5.7709	7.0975	1.3266	0.0393609	0.191913
ENSMUSG00000041444	Arhgap32	Rho GTPase activating protein 32	8.4574	10.0952	9.44806	10.07	8.95273	10.0826	1.12988	0.00861338	0.0607491
ENSMUSG00000036885	Arhgef26	Rho guanine nucleotide exchange factor (GEF) 26	6.46966	7.7705	6.35332	7.64804	6.41149	7.70927	1.29778	0.000923696	0.00993261
ENSMUSG00000040717	Il17rd	interleukin 17 receptor D	6.63777	8.10909	6.65305	8.19205	6.64541	8.15057	1.50516	3.25e-05	0.000559546
ENSMUSG00000028630	Dyrk2	dual-specificity tyrosine-(Y)-phosphorylation regulated kinase 2	8.88261	10.2741	9.29749	10.1805	9.09005	10.2273	1.13723	0.00030776	0.00391747
ENSMUSG00000032998	Foxj3	forkhead box J3	7.995	9.72725	8.48644	9.86966	8.24072	9.79845	1.55773	2.2e-06	5.03e-05
ENSMUSG00000032997	Chpf	chondroitin polymerizing factor	6.25885	7.56584	6.4603	7.27282	6.35957	7.41933	1.05976	0.0121669	0.0793616
ENSMUSG00000020329	Polrmt	polymerase (RNA) mitochondrial (DNA directed)	5.41354	6.91975	5.4595	7.04952	5.43652	6.98464	1.54812	0.000849617	0.00931189
ENSMUSG00000034032	Rpap1	RNA polymerase II associated protein 1	6.62181	8.03578	6.0219	8.06128	6.32186	8.04853	1.72667	1.85e-05	0.00034066
ENSMUSG00000060961	Slc4a4	solute carrier family 4 (anion exchanger), member 4	4.44699	6.14806	4.97343	6.32551	4.71021	6.23678	1.52657	0.00914308	0.063639
ENSMUSG00000023147	Wrb	tryptophan rich basic protein	7.90557	8.56203	7.07949	8.90019	7.49253	8.73111	1.23858	0.00252234	0.0226477
ENSMUSG00000031642	Sh3rf1	SH3 domain containing ring finger 1	7.54001	8.91534	7.29715	8.2306	7.41858	8.57297	1.15439	0.00190407	0.0180501
ENSMUSG00000026932	Nacc2	nucleus accumbens associated 2, BEN and BTB (POZ) domain containing	4.64945	6.37637	4.23497	6.11084	4.44221	6.2436	1.80139	0.00192157	0.0181984
ENSMUSG00000043733	Ptpn11	protein tyrosine phosphatase, non-receptor type 11	8.90256	10.0169	8.80672	9.9481	8.85464	9.98251	1.12787	6.39e-05	0.00102509
ENSMUSG00000042066	Tmcc2	transmembrane and coiled-coil domains 2	8.18073	9.15344	7.70507	8.89059	7.9429	9.02202	1.07911	0.00172979	0.0166868
ENSMUSG00000032690	Oas2	2-5 oligoadenylate synthetase 2	4.64945	6.70536	3.87133	5.0986	4.26039	5.90198	1.64159	0.0125399	0.0812278
ENSMUSG00000024308	Tapbp	TAP binding protein	6.65355	7.35432	5.95029	7.33075	6.30192	7.34253	1.04061	0.026536	0.143365
ENSMUSG00000047604	Frat2	frequently rearranged in advanced T cell lymphomas 2	9.15071	10.1032	7.95724	10.114	8.55397	10.1086	1.55461	0.000365163	0.00453685
ENSMUSG00000051786	Tubgcp6	tubulin, gamma complex associated protein 6	7.10764	8.13272	7.32573	8.42929	7.21669	8.28101	1.06432	0.00362402	0.0303671
ENSMUSG00000027650	Tti1	TELO2 interacting protein 1	6.85809	8.45362	7.51134	8.45557	7.18472	8.45459	1.26988	0.00152076	0.0150051
ENSMUSG00000027652	Ralgapb	Ral GTPase activating protein, beta subunit (non-catalytic)	7.13038	8.78719	7.4607	8.51923	7.29554	8.65321	1.35767	0.000122576	0.00181569
ENSMUSG00000066036	Ubr4	ubiquitin protein ligase E3 component n-recognin 4	9.93212	11.2212	9.35176	11.2197	9.64194	11.2204	1.57849	4.87e-07	1.29e-05
ENSMUSG00000050812	AI314180	expressed sequence AI314180	6.65355	8.61891	7.90138	8.46853	7.27747	8.54372	1.26625	0.0159805	0.0980719
ENSMUSG00000085782	Gm15624	predicted gene 15624	4.44699	5.94947	4.87374	5.89741	4.66037	5.92344	1.26308	0.0415412	0.199625
ENSMUSG00000038506	Dcun1d2	DCN1, defective in cullin neddylation 1, domain containing 2 (S. cerevisiae)	6.29954	7.62258	5.76793	6.80578	6.03373	7.21418	1.18045	0.01354	0.0861518
ENSMUSG00000042535	Gtpbp1	GTP binding protein 1	8.93198	9.8296	8.33066	9.69871	8.63132	9.76415	1.13284	0.000772025	0.00857418
ENSMUSG00000029020	Mfn2	mitofusin 2	8.18073	9.51587	7.99925	9.25463	8.08999	9.38525	1.29526	2.4e-05	0.000429913
ENSMUSG00000029028	Lrrc47	leucine rich repeat containing 47	8.38833	10.4738	7.98139	9.07562	8.18486	9.77473	1.58987	0.000117154	0.00174313
ENSMUSG00000013629	Cad	carbamoyl-phosphate synthetase 2, aspartate transcarbamylase, and dihydroorotase	7.3104	8.61891	6.86259	8.6272	7.0865	8.62306	1.53656	1.28e-05	0.000246014
ENSMUSG00000032324	Tspan3	tetraspanin 3	9.94179	10.7672	8.93592	10.6868	9.43885	10.727	1.28816	0.00132033	0.0134067
ENSMUSG00000046049	Rp1l1	retinitis pigmentosa 1 homolog like 1	6.10664	7.18382	5.4595	6.82607	5.78307	7.00494	1.22187	0.0132293	0.0845897
ENSMUSG00000027329	Spef1	sperm flagellar 1	6.01187	7.51879	5.99842	6.94211	6.00514	7.23045	1.22531	0.00588316	0.0447515
ENSMUSG00000040820	Hlcs	holocarboxylase synthetase (biotin-	5.7435	7.66641	5.35246	7.46615	5.54798	7.56628	2.0183	2.68e-06	6.06e-05
ENSMUSG00000028986	Klhl7	kelch-like 7	5.88392	7.96734	7.07949	8.15244	6.4817	8.05989	1.57819	0.00243134	0.0219999
ENSMUSG00000042453	Reln	reelin	8.47527	10.1032	8.7375	10.04	8.60638	10.0716	1.46518	6.49e-07	1.68e-05
ENSMUSG00000045482	Trrap	transformation/transcription domain-associated protein	10.1811	11.3834	9.67603	11.235	9.92856	11.3092	1.38064	7.02e-06	0.000143135
ENSMUSG00000056296	Synpr	synaptoporin	4.51768	7.10637	5.55914	6.8658	5.03841	6.98608	1.94767	0.000537801	0.00632492
ENSMUSG00000051243	Islr2	immunoglobulin superfamily containing leucine-rich repeat 2	8.91571	9.72466	7.95724	9.15793	8.43648	9.44129	1.00482	0.0196441	0.114631
ENSMUSG00000052533	Nup188	nucleoporin 188	8.31083	9.57169	7.80318	9.53278	8.05701	9.55223	1.49523	3.54e-06	7.73e-05
ENSMUSG00000022526	Zfp251	zinc finger protein 251	6.80255	8.1864	6.87554	8.06128	6.83904	8.12384	1.28479	0.000397761	0.00486853
ENSMUSG00000021803	Cdhr1	cadherin-related family member 1	8.93843	9.4231	7.89504	9.62248	8.41673	9.52279	1.10605	0.0104559	0.0706146
ENSMUSG00000107068	Gm42742	predicted gene 42742	6.71501	8.51485	7.4171	7.99116	7.06606	8.253	1.18695	0.00620548	0.0465361
ENSMUSG00000036155	Mgat5	mannoside acetylglucosaminyltransferase 5	8.63484	9.85112	8.28773	9.70967	8.46128	9.7804	1.31911	1.24e-05	0.00023838
ENSMUSG00000038462	Uqcrfs1	ubiquinol-cytochrome c reductase, Rieske iron-sulfur polypeptide 1	6.98826	8.41559	6.78239	8.6156	6.88532	8.5156	1.63027	2.59e-06	5.87e-05
ENSMUSG00000030655	Smg1	SMG1 homolog, phosphatidylinositol 3-kinase-related kinase (C. elegans)	7.57358	9.61707	8.88562	9.45677	8.2296	9.53692	1.30732	0.0103303	0.0699624
ENSMUSG00000037685	Atp8a1	ATPase, aminophospholipid transporter (APLT), class I, type 8A, member 1	6.39651	8.12489	7.33513	8.44249	6.86582	8.28369	1.41786	0.00220046	0.0203203
ENSMUSG00000036480	Prss56	protease, serine 56	5.93647	7.56584	5.52669	8.31195	5.73158	7.9389	2.20732	4.65e-07	1.24e-05
ENSMUSG00000076432	Ywhaq	tyrosine 3-monooxygenase/tryptophan 5-monooxygenase activation protein theta	9.86761	11.2805	10.1172	11.3689	9.99241	11.3247	1.33229	3.24e-06	7.15e-05
ENSMUSG00000073096	Lrrc61	leucine rich repeat containing 61	4.77018	6.26672	5.02081	6.29673	4.8955	6.28173	1.38623	0.0123796	0.0804345
ENSMUSG00000011832	Evi5l	ecotropic viral integration site 5 like	7.24939	8.29511	6.4603	8.42929	6.85485	8.3622	1.50735	0.000244767	0.00322647
ENSMUSG00000027425	Kat14	lysine acetyltransferase 14	7.85186	8.96006	8.19783	9.14184	8.02484	9.05095	1.0261	0.00234301	0.0213315
ENSMUSG00000049511	Htr1b	5-hydroxytryptamine (serotonin) receptor 1B	5.03406	7.00758	5.79544	6.56155	5.41475	6.78456	1.36982	0.0118492	0.0776584
ENSMUSG00000038022	Mindy4	MINDY lysine 48 deubiquitinase 4	5.96204	6.99044	5.99842	7.10036	5.98023	7.0454	1.06517	0.0172221	0.103675
ENSMUSG00000024736	Tmem132a	transmembrane protein 132A	8.00119	9.06204	7.7689	9.14184	7.88504	9.10194	1.2169	0.000100909	0.00152954
ENSMUSG00000027285	Haus2	HAUS augmin-like complex, subunit 2	5.91043	7.83914	6.42552	7.03216	6.16797	7.43565	1.26768	0.00707299	0.0519732
ENSMUSG00000026773	Pfkfb3	6-phosphofructo-2-kinase/fructose-2,6-biphosphatase 3	5.21512	7.62258	5.11114	7.8596	5.16313	7.74109	2.57795	1.15e-09	4.8e-08
ENSMUSG00000026482	Rgl1	ral guanine nucleotide dissociation stimulator,-like 1	6.39651	8.04411	6.4603	7.96396	6.42841	8.00404	1.57563	2.54e-05	0.000451716
ENSMUSG00000034189	Hsdl1	hydroxysteroid dehydrogenase like 1	8.48853	9.27168	7.92024	9.54812	8.20438	9.4099	1.20552	0.000468172	0.0056135
ENSMUSG00000027220	Syt13	synaptotagmin XIII	6.12939	6.93775	5.27642	7.35886	5.70291	7.14831	1.4454	0.00463159	0.0370289
ENSMUSG00000074030	Exoc8	exocyst complex component 8	6.97575	7.54251	6.54376	8.00011	6.75976	7.77131	1.01155	0.0146782	0.0919213
ENSMUSG00000009376	Met	met proto-oncogene	4.44699	7.24292	5.68212	6.60914	5.06456	6.92603	1.86147	0.00228272	0.0209227
ENSMUSG00000017740	Slc12a5	solute carrier family 12, member 5	7.04918	8.63555	6.72633	8.24574	6.88776	8.44064	1.55289	2.05e-05	0.000373641
ENSMUSG00000002996	Hbp1	high mobility group box transcription factor 1	7.28022	8.50884	8.12381	8.97021	7.70202	8.73952	1.03751	0.0187449	0.110925
ENSMUSG00000040836	Gpr161	G protein-coupled receptor 161	6.78832	8.91079	7.7689	8.6272	7.27861	8.769	1.49038	0.000852604	0.00933585
ENSMUSG00000040797	Iqsec3	IQ motif and Sec7 domain 3	9.66257	11.0035	8.87921	10.9862	9.27089	10.9948	1.72393	6.19e-07	1.61e-05
ENSMUSG00000053253	Ndfip2	Nedd4 family interacting protein 2	5.80132	7.22837	6.49427	7.50441	6.14779	7.36639	1.2186	0.0111789	0.0743933
ENSMUSG00000054150	Syne3	spectrin repeat containing, nuclear envelope family member 3	0	4.74625	0	5.03031	0	4.88828	4.88828	1.11e-05	0.000215399
ENSMUSG00000108037	Gm44597	predicted gene 44597	4.12349	5.98453	1.0348	6.11084	2.57914	6.04768	3.46854	0.000936012	0.0100512
ENSMUSG00000031974	Abcb10	ATP-binding cassette, sub-family B (MDR/TAP), member 10	5.88392	6.66271	5.02081	6.94211	5.45236	6.80241	1.35005	0.012696	0.0820109
ENSMUSG00000031979	Cog2	component of oligomeric golgi complex 2	6.01187	7.13785	5.35246	6.94211	5.68217	7.03998	1.35782	0.00549233	0.0422205
ENSMUSG00000031024	St5	suppression of tumorigenicity 5	8.00734	8.74692	7.15575	8.90497	7.58155	8.82594	1.2444	0.00213834	0.0198093
ENSMUSG00000031028	Tub	tubby bipartite transcription factor	7.67758	9.261	7.76195	9.15392	7.71976	9.20746	1.4877	1.25e-06	3.02e-05
ENSMUSG00000028863	Meaf6	MYST/Esa1-associated factor 6	9.0853	10.002	8.24348	9.88424	8.66439	9.94313	1.27874	0.000613995	0.00705747
ENSMUSG00000032612	Usp4	ubiquitin specific peptidase 4 (proto-oncogene)	7.65424	8.72636	7.37214	8.72765	7.51319	8.72701	1.21382	0.000254881	0.00333906
ENSMUSG00000029406	Pitpnm2	phosphatidylinositol transfer protein, membrane-associated 2	7.62251	8.30207	6.49427	8.33336	7.05839	8.31772	1.25933	0.00910578	0.0634929
ENSMUSG00000042793	Lgr6	leucine-rich repeat-containing G protein-coupled receptor 6	0	3.10428	0	4.4324	0	3.76834	3.76834	0.00373759	0.0311288
ENSMUSG00000025764	Jade1	jade family PHD finger 1	6.66917	7.51879	6.71197	7.95478	6.69057	7.73678	1.04622	0.00876451	0.0615361
ENSMUSG00000074136	4930513N10Rik	RIKEN cDNA 4930513N10 gene	4.51768	6.14806	4.23497	5.5526	4.37633	5.85033	1.474	0.0189076	0.111549
ENSMUSG00000045071	E130308A19Rik	RIKEN cDNA E130308A19 gene	8.3501	9.39731	8.31174	9.5633	8.33092	9.48031	1.14939	0.000110006	0.00164938
ENSMUSG00000024598	Fbn2	fibrillin 2	6.75944	8.35661	7.35375	8.13629	7.0566	8.24645	1.18985	0.0033682	0.0286346
ENSMUSG00000090291	Lrrc10b	leucine rich repeat containing 10B	4.985	7.00758	3.5221	6.40855	4.25355	6.70807	2.45452	0.000164709	0.00232194
ENSMUSG00000001995	Sipa1l2	signal-induced proliferation-associated 1 like 2	7.50564	8.74181	7.02244	8.58021	7.26404	8.66101	1.39697	8.51e-05	0.00131557
ENSMUSG00000005672	Kit	KIT proto-oncogene receptor tyrosine kinase	7.9888	9.15728	6.97511	8.6156	7.48196	8.88644	1.40449	0.00151059	0.0149174
ENSMUSG00000041406	BC055324	cDNA sequence BC055324	4.71108	6.32259	5.06668	6.46137	4.88888	6.39198	1.5031	0.00614469	0.0461685
ENSMUSG00000022033	Pbk	PDZ binding kinase	8.12522	9.74268	8.26823	9.77111	8.19672	9.7569	1.56017	8.38e-08	2.56e-06
ENSMUSG00000022031	Elp3	elongator acetyltransferase complex subunit 3	8.44838	9.48561	7.94501	9.45025	8.1967	9.46793	1.27123	9.48e-05	0.00144761
ENSMUSG00000055632	Hmcn2	hemicentin 2	0	3.87572	0	2.87497	0	3.37535	3.37535	0.0181573	0.108244
ENSMUSG00000061724	Gm2423	predicted gene 2423	7.73804	8.87854	7.55222	8.84659	7.64513	8.86257	1.21743	0.000142974	0.00206089
ENSMUSG00000039158	Akna	AT-hook transcription factor	7.82424	9.06613	7.51961	9.01948	7.67192	9.04281	1.37088	1.78e-05	0.000329638
ENSMUSG00000052911	Lamb2	laminin, beta 2	7.27002	8.79708	6.88837	8.38212	7.07919	8.5896	1.51041	3.02e-05	0.000526187
ENSMUSG00000052915	Msl1	male-specific lethal 1 homolog (Drosophila)	9.68386	10.9222	9.11578	10.7439	9.39982	10.833	1.4332	6.44e-06	0.000132595
ENSMUSG00000039842	Mcph1	microcephaly, primary autosomal recessive 1	5.5547	7.39397	6.31583	7.40004	5.93526	7.397	1.46174	0.00246525	0.0222206
ENSMUSG00000020042	Btbd11	BTB (POZ) domain containing 11	3.82211	6.1168	3.87133	6.46137	3.84672	6.28909	2.44237	4.51e-05	0.000753882
ENSMUSG00000054519	Zfp867	zinc finger protein 867	4.02985	6.26672	5.68212	6.51233	4.85599	6.38953	1.53354	0.0484717	0.222575
ENSMUSG00000033767	Tmem131l	transmembrane 131 like	7.51431	8.66286	7.57621	8.80633	7.54526	8.73459	1.18933	0.000283289	0.00365987
ENSMUSG00000023026	Dip2b	disco interacting protein 2 homolog B	8.0317	9.76049	8.00515	9.8149	8.01842	9.78769	1.76927	5.94e-10	2.58e-08
ENSMUSG00000049532	Sall2	sal-like 2 (Drosophila)	8.3501	9.45781	7.74088	9.29156	8.04549	9.37469	1.32919	0.000115591	0.00172207
ENSMUSG00000046204	Pnma2	paraneoplastic antigen MA2	4.44699	6.05218	4.76664	5.81862	4.60682	5.9354	1.32859	0.0299574	0.156912
ENSMUSG00000038949	Cnst	consortin, connexin sorting protein	7.76735	8.93787	7.51961	8.90497	7.64348	8.92142	1.27794	6.76e-05	0.00107571
ENSMUSG00000000149	Gna12	guanine nucleotide binding protein, alpha 12	9.60691	10.9446	9.21587	11.0185	9.41139	10.9815	1.57015	5.97e-08	1.89e-06
ENSMUSG00000026313	Hdac4	histone deacetylase 4	7.40667	8.36328	7.10169	8.35446	7.25418	8.35887	1.10469	0.00175551	0.0168791
ENSMUSG00000064080	Fbln2	fibulin 2	5.91043	6.74679	4.70995	7.04952	5.31019	6.89815	1.58796	0.00687455	0.0507547
ENSMUSG00000005043	Sgsh	N-sulfoglucosamine sulfohydrolase (sulfamidase)	5.52068	7.2997	5.4595	7.42684	5.49009	7.36327	1.87318	1.6e-05	0.000299486
ENSMUSG00000017670	Elmo2	engulfment and cell motility 2	8.4797	9.10647	7.63829	9.14588	8.05899	9.12618	1.06718	0.00716585	0.0524574
ENSMUSG00000001482	Def8	differentially expressed in FDCP 8	7.73062	8.84078	7.44342	8.83162	7.58702	8.8362	1.24918	0.000133604	0.0019518
ENSMUSG00000037606	Osbpl5	oxysterol binding protein-like 5	5.52068	7.07419	4.92445	6.76434	5.22256	6.91926	1.6967	0.000724076	0.00812858
ENSMUSG00000031529	Tnks	tankyrase, TRF1-interacting ankyrin-related ADP-ribose polymerase	8.11955	9.85586	8.92662	9.76061	8.52308	9.80824	1.28515	0.000873715	0.00950903
ENSMUSG00000031295	Phka2	phosphorylase kinase alpha 2	5.7435	7.18382	5.49348	7.0146	5.61849	7.09921	1.48072	0.00109279	0.0114451
ENSMUSG00000072825	Cep170b	centrosomal protein 170B	8.38361	10.5693	7.6978	10.4111	8.04071	10.4902	2.44951	9.83e-14	7.11e-12
ENSMUSG00000025332	Kdm5c	lysine (K)-specific demethylase 5C	8.13649	9.51288	8.43052	9.08827	8.28351	9.30057	1.01706	0.00244402	0.0220763
ENSMUSG00000032175	Tyk2	tyrosine kinase 2	5.21512	6.78706	5.79544	6.35372	5.50528	6.57039	1.06511	0.0495126	0.225823
ENSMUSG00000053141	Ptprt	protein tyrosine phosphatase, receptor type, T	6.89839	8.82152	7.90138	8.38212	7.39988	8.60182	1.20194	0.0108939	0.0728913
ENSMUSG00000027200	Sema6d	sema domain, transmembrane domain (TM), and cytoplasmic domain, (semaphorin) 6D	4.93422	6.86437	5.38903	7.35886	5.16163	7.11162	1.94999	7.28e-05	0.00115069
ENSMUSG00000027207	Galk2	galactokinase 2	4.71108	6.47826	5.23684	5.85855	4.97396	6.16841	1.19445	0.0428249	0.203711
ENSMUSG00000034105	Tldc1	TBC/LysM associated domain containing 1	6.06003	6.52663	4.87374	7.54168	5.46689	7.03415	1.56727	0.00780159	0.0560689
ENSMUSG00000105053	Gm43064	predicted gene 43064	0	5.63337	1.0348	5.97212	0.517401	5.80274	5.28534	2.4e-08	8.26e-07
ENSMUSG00000029291	Rufy3	RUN and FYVE domain containing 3	7.89233	9.82718	9.13205	9.53586	8.51219	9.68152	1.16933	0.0193436	0.113513
ENSMUSG00000035764	Fbxo45	F-box protein 45	7.25974	8.55621	7.78956	8.82156	7.52465	8.68889	1.16423	0.00203475	0.0191075
ENSMUSG00000001138	Cnnm3	cyclin M3	6.75944	8.17126	6.69746	7.82977	6.72845	8.00052	1.27207	0.000731367	0.00818886
ENSMUSG00000039086	Ss18l1	SS18, nBAF chromatin remodeling complex subunit like 1	6.95042	9.41348	7.66089	9.66251	7.30566	9.53799	2.23234	1.23e-09	5.13e-08
ENSMUSG00000040249	Lrp1	low density lipoprotein receptor-related protein 1	9.56372	10.996	8.96346	10.8883	9.26359	10.9421	1.67855	1.22e-07	3.63e-06
ENSMUSG00000061950	Ppp4r1	protein phosphatase 4, regulatory subunit 1	8.18617	9.20637	7.99332	9.22056	8.08974	9.21346	1.12372	0.000237763	0.00315016
ENSMUSG00000055745	Ldoc1l	leucine zipper, down-regulated in cancer 1-like	8.48853	10.0063	7.56826	9.66814	8.02839	9.83721	1.80882	2.79e-06	6.28e-05
ENSMUSG00000047731	Wbp1l	WW domain binding protein 1 like	9.56789	11.4641	8.66852	11.5413	9.11821	11.5027	2.38448	3.12e-11	1.65e-09
ENSMUSG00000108521	Gm44639	predicted gene 44639	3.82211	5.16826	2.64251	5.22618	3.23231	5.19722	1.96491	0.0237814	0.132754
ENSMUSG00000053436	Mapk14	mitogen-activated protein kinase 14	7.95735	8.9289	7.05694	8.95647	7.50715	8.94269	1.43554	0.000384592	0.0047304
ENSMUSG00000039646	Vasn	vasorin	5.62042	6.50265	4.58942	6.40855	5.10492	6.4556	1.35068	0.026166	0.141695
ENSMUSG00000038696	Mapkap1	mitogen-activated protein kinase associated protein 1	7.69294	8.53863	7.24823	8.75964	7.47058	8.64913	1.17855	0.000900454	0.00973649
ENSMUSG00000020941	Map3k14	mitogen-activated protein kinase kinase kinase 14	5.58793	7.49467	5.4595	6.72168	5.52372	7.10817	1.58446	0.00085807	0.0093815
ENSMUSG00000037012	Hk1	hexokinase 1	8.41172	9.05381	7.54414	9.14588	7.97793	9.09984	1.12191	0.0051971	0.0404556
ENSMUSG00000023411	Nfatc4	nuclear factor of activated T cells, cytoplasmic, calcineurin dependent 4	5.33741	6.64091	4.70995	6.88526	5.02368	6.76308	1.7394	0.000868551	0.00945724
ENSMUSG00000029151	Slc30a3	solute carrier family 30 (zinc transporter), member 3	3.44067	6.26672	4.92445	5.73528	4.18256	6.001	1.81844	0.0187783	0.11101
ENSMUSG00000025815	Dhtkd1	dehydrogenase E1 and transketolase domain containing 1	3.92972	6.47826	5.15427	6.35372	4.54199	6.41599	1.874	0.00443957	0.0358374
ENSMUSG00000022456	Sept3	septin 3	10.378	12.2075	10.0068	12.0082	10.1924	12.1078	1.91543	2.98e-11	1.59e-09
ENSMUSG00000042719	Naa25	N(alpha)-acetyltransferase 25, NatB auxiliary subunit	5.37598	6.70536	6.17633	7.19698	5.77616	6.95117	1.17501	0.0288324	0.152406
ENSMUSG00000036834	Plch1	phospholipase C, eta 1	6.29954	8.53863	7.74794	7.89843	7.02374	8.21853	1.19479	0.0492834	0.225107
ENSMUSG00000069170	Adgrv1	adhesion G protein-coupled receptor V1	8.50602	10.8106	9.52607	10.6274	9.01604	10.719	1.70294	3.58e-05	0.000612021
ENSMUSG00000035566	Pcdh17	protocadherin 17	7.10764	8.86919	7.90138	8.38212	7.50451	8.62566	1.12115	0.0096014	0.0661975
ENSMUSG00000013539	Tango2	transport and golgi organization 2	6.29954	7.05782	4.97343	7.06667	5.63649	7.06224	1.42576	0.0179405	0.107413
ENSMUSG00000087141	Plcxd2	phosphatidylinositol-specific phospholipase C, X domain containing 2	5.82938	7.63366	6.52745	7.24296	6.17842	7.43831	1.25989	0.00829097	0.0588843
ENSMUSG00000024472	Dcp2	decapping mRNA 2	7.15276	10.3914	8.7863	10.5654	7.96953	10.4784	2.50883	0.00477911	0.0379355
ENSMUSG00000007216	Zfp775	zinc finger protein 775	5.98717	7.28571	5.23684	7.57801	5.61201	7.43186	1.81985	0.000114535	0.0017096
ENSMUSG00000030522	Mtmr10	myotubularin related protein 10	5.58793	7.45773	6.3347	7.75769	5.96131	7.60771	1.6464	0.000445153	0.00537337
ENSMUSG00000070705	Eid2b	EP300 interacting inhibitor of differentiation 2B	6.3585	7.2997	6.4603	7.64804	6.4094	7.47387	1.06447	0.0106108	0.0714479
ENSMUSG00000070709	Zfp974	zinc finger protein 974	2.09962	5.39363	3.23123	5.73528	2.66542	5.56446	2.89903	0.000425732	0.00517878
ENSMUSG00000034310	Tmem132d	transmembrane protein 132D	7.00065	7.75028	6.52745	7.77866	6.76405	7.76447	1.00042	0.014054	0.0885772
ENSMUSG00000069237	Fam8a1	family with sequence similarity 8, member A1	6.88508	9.05793	8.49904	9.30607	7.69206	9.182	1.48994	0.0115645	0.076181
ENSMUSG00000035049	Rrp12	ribosomal RNA processing 12 homolog (S. cerevisiae)	5.96204	7.40695	4.92445	6.74317	5.44324	7.07506	1.63181	0.00303376	0.0263839
ENSMUSG00000041014	Nrg3	neuregulin 3	5.48584	7.10637	5.35246	7.04952	5.41915	7.07794	1.65879	0.000277545	0.00359501
ENSMUSG00000075419	Dolk	dolichol kinase	5.41354	6.59628	4.52516	6.99682	4.96935	6.79655	1.8272	0.000919469	0.00990084
ENSMUSG00000038866	Zcchc2	zinc finger, CCHC domain containing 2	6.29954	7.69843	6.63793	7.34488	6.46873	7.52165	1.05292	0.0135981	0.0864188
ENSMUSG00000038861	Pi4kb	phosphatidylinositol 4-kinase beta	7.59008	8.50884	7.23824	8.40926	7.41416	8.45905	1.04489	0.00299881	0.0261514
ENSMUSG00000021972	Hmbox1	homeobox containing 1	9.10265	10.2687	9.15081	10.1345	9.12673	10.2016	1.07488	0.000139916	0.00202752
ENSMUSG00000021978	Extl3	exostoses (multiple)-like 3	8.20771	9.29979	8.07415	9.20902	8.14093	9.2544	1.11348	0.000234585	0.00311159
ENSMUSG00000033272	Slc35a4	solute carrier family 35, member A4	7.32032	8.42838	7.04553	8.32626	7.18293	8.37732	1.1944	0.000663855	0.0075488
ENSMUSG00000037224	Zfyve28	zinc finger, FYVE domain containing 28	5.33741	6.82623	4.15229	6.07739	4.74485	6.45181	1.70696	0.00750216	0.0543401
ENSMUSG00000027983	Cyp2u1	cytochrome P450, family 2, subfamily u, polypeptide 1	5.45014	6.34973	5.35246	6.82607	5.4013	6.5879	1.18659	0.0188849	0.111443
ENSMUSG00000048191	Muc6	mucin 6, gastric	2.92066	5.5422	4.65094	6.20678	3.7858	5.87449	2.08868	0.0131908	0.0844366
ENSMUSG00000031103	Elf4	E74-like factor 4 (ets domain transcription factor)	4.82696	5.67688	4.15229	5.93525	4.48962	5.80606	1.31644	0.045063	0.211263
ENSMUSG00000068923	Syt11	synaptotagmin XI	8.4574	9.67723	8.33066	9.72864	8.39403	9.70294	1.30891	5.53e-06	0.000115365
ENSMUSG00000029723	Tsc22d4	TSC22 domain family, member 4	6.85809	7.79045	6.06773	7.6929	6.46291	7.74168	1.27876	0.00445393	0.0359036
ENSMUSG00000025314	Ptprj	protein tyrosine phosphatase, receptor type, J	7.30041	8.84078	7.34447	8.8712	7.32244	8.85599	1.53355	1.76e-06	4.14e-05
ENSMUSG00000032480	Dhx30	DEAH (Asp-Glu-Ala-His) box polypeptide 30	8.3355	9.29281	7.86938	9.10081	8.10244	9.19681	1.09437	0.00105561	0.0111256
ENSMUSG00000042105	Inpp5f	inositol polyphosphate-5-phosphatase F	6.78832	8.47226	7.88866	8.2975	7.33849	8.38488	1.04639	0.0402299	0.194917
ENSMUSG00000080902	Ywhaq-ps3	tyrosine 3-monooxygenase/tryptophan 5-monooxygenase activation protein theta, pseudogene 3	7.85186	8.8645	7.54414	8.88577	7.698	8.87513	1.17713	0.000316676	0.00402001
ENSMUSG00000005534	Insr	insulin receptor	8.24985	9.44528	8.34469	9.74472	8.29727	9.595	1.29773	2.07e-05	0.000377536
ENSMUSG00000004661	Arid3b	AT rich interactive domain 3B (BRIGHT-like)	6.50488	7.49467	6.3347	7.75769	6.41979	7.62618	1.20639	0.00271582	0.0240702
ENSMUSG00000027834	Serpini1	serine (or cysteine) peptidase inhibitor, clade I, member 1	2.09962	5.39363	5.11114	6.74317	3.60538	6.0684	2.46302	0.0300363	0.157149
ENSMUSG00000020821	Kif1c	kinesin family member 1C	7.10764	8.2526	6.35332	7.76821	6.73048	8.01041	1.27993	0.00345079	0.0291985
ENSMUSG00000040151	Hs2st1	heparan sulfate 2-O-sulfotransferase 1	8.40241	9.31364	8.30697	9.39701	8.35469	9.35532	1.00063	0.00083043	0.00913583
ENSMUSG00000102976	Zc3h11a	zinc finger CCCH type containing 11A	5.03406	7.99339	5.92561	5.89741	5.47983	6.9454	1.46557	0.0101722	0.069294
ENSMUSG00000019861	Gopc	golgi associated PDZ and coiled-coil motif containing	4.77018	7.18382	6.47738	7.06667	5.62378	7.12524	1.50146	0.0377215	0.185743
ENSMUSG00000037523	Mavs	mitochondrial antiviral signaling protein	7.0372	8.2526	6.55989	7.61345	6.79855	7.93303	1.13448	0.00649497	0.0483344
ENSMUSG00000072082	Ccnf	cyclin F	8.06748	9.06204	7.76195	9.10496	7.91471	9.0835	1.16879	0.000238823	0.00315882
ENSMUSG00000026159	Agfg1	ArfGAP with FG repeats 1	6.48738	8.16364	7.16632	8.60976	6.82685	8.3867	1.55985	0.000191808	0.00263553
ENSMUSG00000030170	Wnt5b	wingless-type MMTV integration site family, member 5B	4.02985	6.37637	5.19615	6.11084	4.613	6.2436	1.6306	0.0157189	0.0967504
ENSMUSG00000035270	Impg2	interphotoreceptor matrix proteoglycan 2	5.85691	8.309	7.33513	7.99116	6.59602	8.15008	1.55406	0.00811874	0.0579077
ENSMUSG00000026840	Lamc3	laminin gamma 3	5.03406	6.47826	3.97119	5.64683	4.50262	6.06255	1.55992	0.0199303	0.11557
ENSMUSG00000102504	Gm21955	predicted gene, 21955	4.02985	5.28534	4.38735	6.04315	4.2086	5.66424	1.45564	0.0294349	0.154626
ENSMUSG00000032724	Abtb2	ankyrin repeat and BTB (POZ) domain containing 2	4.71108	6.34973	4.70995	5.73528	4.71051	6.0425	1.33199	0.0229445	0.128976
ENSMUSG00000109715	Gm45606	predicted gene 45606	4.12349	5.49435	4.15229	5.5526	4.13789	5.52348	1.38559	0.042183	0.202086
ENSMUSG00000074221	Zfp568	zinc finger protein 568	6.37763	8.48456	7.40822	8.02664	6.89293	8.2556	1.36268	0.00521364	0.0405445
ENSMUSG00000024143	Rhoq	ras homolog family member Q	7.20724	8.86919	7.81666	9.12556	7.51195	8.99738	1.48543	6.92e-05	0.00109836
ENSMUSG00000027490	E2f1	E2F transcription factor 1	10.9807	12.3617	9.82526	12.2059	10.403	12.2838	1.88082	6.57e-06	0.000134929
ENSMUSG00000041773	Enc1	ectodermal-neural cortex 1	8.43017	9.57744	8.04006	9.63115	8.23511	9.6043	1.36918	9.04e-06	0.000178988
ENSMUSG00000051675	Trim32	tripartite motif-containing 32	4.51768	8.59075	6.09012	8.11995	5.3039	8.35535	3.05145	3.4e-08	1.13e-06
ENSMUSG00000051674	Dcun1d4	DCN1, defective in cullin neddylation 1, domain containing 4 (S. cerevisiae)	6.06003	7.51879	6.62266	7.42684	6.34135	7.47282	1.13147	0.0120443	0.0787889
ENSMUSG00000026452	Syt2	synaptotagmin II	4.29429	5.67688	3.38398	5.69173	3.83913	5.68431	1.84517	0.0106018	0.0714233
ENSMUSG00000026455	Klhl12	kelch-like 12	6.37763	8.07697	7.10169	8.44249	6.73966	8.25973	1.52006	0.000379105	0.00467374
ENSMUSG00000026456	Cyb5r1	cytochrome b5 reductase 1	5.0815	6.78706	5.06668	7.06667	5.07409	6.92686	1.85277	0.000122446	0.00181492
ENSMUSG00000026458	Ppfia4	protein tyrosine phosphatase, receptor type, f polypeptide (PTPRF), interacting protein (liprin), alpha 4	4.51768	6.47826	4.97343	6.1755	4.74556	6.32688	1.58132	0.00542176	0.0417864
ENSMUSG00000061273	Mmgt1	membrane magnesium transporter 1	8.1643	9.49779	8.84012	9.64834	8.50221	9.57306	1.07085	0.00404605	0.0331887
ENSMUSG00000074505	Fat3	FAT atypical cadherin 3	8.7785	11.032	9.96656	10.8664	9.37253	10.9492	1.5767	0.000491289	0.00583968
ENSMUSG00000037720	Tmem33	transmembrane protein 33	6.92464	8.36993	7.1451	8.86631	7.03487	8.61812	1.58325	1.38e-05	0.000262976
ENSMUSG00000037098	Rab11fip3	RAB11 family interacting protein 3 (class II)	7.52293	8.85506	6.82305	8.73303	7.17299	8.79404	1.62106	1.61e-05	0.000301196
ENSMUSG00000014496	Ankrd28	ankyrin repeat domain 28	7.3104	8.87854	8.4566	9.4105	7.8835	9.14452	1.26102	0.00965781	0.0664882
ENSMUSG00000038371	Sbf2	SET binding factor 2	8.13087	9.46714	8.44796	9.25836	8.28941	9.36275	1.07334	0.000897267	0.00971554
ENSMUSG00000062960	Kdr	kinase insert domain protein receptor	10.0941	11.2458	10.0883	11.2752	10.0912	11.2605	1.16924	1.53e-05	0.000287671
ENSMUSG00000052135	Foxo6	forkhead box O6	6.27933	7.31355	5.02081	6.69986	5.65007	7.0067	1.35663	0.0236752	0.132256
ENSMUSG00000038957	Edc3	enhancer of mRNA decapping 3	7.55689	7.96734	7.02244	8.65581	7.28966	8.31158	1.02191	0.0120994	0.079076
ENSMUSG00000032968	Inha	inhibin alpha	5.52068	7.27159	5.02081	7.0146	5.27075	7.14309	1.87235	7.82e-05	0.00122261
ENSMUSG00000033618	Map3k13	mitogen-activated protein kinase kinase kinase 13	5.80132	7.60015	6.15526	7.50441	5.97829	7.55228	1.57399	0.000207346	0.00281425
ENSMUSG00000006527	Sfmbt1	Scm-like with four mbt domains 1	7.10764	8.62448	8.01102	8.73303	7.55933	8.67875	1.11942	0.0117	0.0768963
ENSMUSG00000060950	Trmt61a	tRNA methyltransferase 61A	6.37763	8.52679	6.21758	8.15244	6.29761	8.33962	2.04201	3.56e-08	1.18e-06
ENSMUSG00000069729	Arid1b	AT rich interactive domain 1B (SWI-like)	9.70862	10.8396	9.71796	10.6701	9.71329	10.7548	1.04155	0.000180151	0.00250484
ENSMUSG00000007739	Cct4	chaperonin containing Tcp1, subunit 4 (delta)	8.24465	9.18015	8.44796	9.62538	8.3463	9.40276	1.05646	0.00129207	0.0131602
ENSMUSG00000044912	Syt16	synaptotagmin XVI	5.5547	7.00758	6.23777	7.18132	5.89624	7.09445	1.19821	0.0165655	0.100867
ENSMUSG00000032570	Atp2c1	ATPase, Ca++-sequestering	6.78832	8.73668	7.70507	9.01948	7.2467	8.87808	1.63138	0.000139751	0.00202639
ENSMUSG00000040325	Vprbp	Vpr (HIV-1) binding protein	6.65355	8.61332	7.30674	8.36836	6.98015	8.49084	1.51069	0.000158798	0.00225495
ENSMUSG00000041638	Gcn1l1	GCN1 general control of amino-acid synthesis 1-like 1 (yeast)	8.67405	9.47023	8.06852	9.39021	8.37129	9.43022	1.05894	0.0021736	0.0201201
ENSMUSG00000047583	Tyw3	tRNA-yW synthesizing protein 3 homolog (S. cerevisiae)	5.85691	6.84543	5.62194	7.06667	5.73942	6.95605	1.21662	0.00862035	0.0607799
ENSMUSG00000004356	Utp20	UTP20 small subunit processome component	5.7727	7.57737	6.51095	7.27282	6.14183	7.42509	1.28327	0.00776102	0.0558683
ENSMUSG00000036644	Tbc1d9b	TBC1 domain family, member 9B	8.37412	9.22847	7.39029	8.8165	7.8822	9.02248	1.14028	0.00873508	0.0614033
ENSMUSG00000036646	Man1b1	mannosidase, alpha, class 1B, member 1	8.74942	10.0912	8.22337	9.95502	8.48639	10.0231	1.5367	1.2e-06	2.92e-05
ENSMUSG00000039405	Prss23	protease, serine 23	8.35976	9.49779	8.13462	9.25463	8.24719	9.37621	1.12902	0.000250814	0.00329132
ENSMUSG00000039601	Rcan2	regulator of calcineurin 2	6.31946	7.95855	5.92561	8.00011	6.12253	7.97933	1.8568	2.12e-06	4.89e-05
ENSMUSG00000048385	Scrt1	scratch family zinc finger 1	7.79607	8.82636	6.96304	8.65014	7.37956	8.73825	1.35869	0.000746192	0.00833885
ENSMUSG00000023353	Agap3	ArfGAP with GTPase domain, ankyrin repeat and PH domain 3	8.94806	9.93416	8.28773	9.88907	8.61789	9.91162	1.29372	0.000140509	0.00203485
ENSMUSG00000021260	Hhipl1	hedgehog interacting protein-like 1	4.44699	6.08485	4.06458	5.64683	4.25579	5.86584	1.61006	0.0112683	0.0748172
ENSMUSG00000021264	Yy1	YY1 transcription factor	8.12522	9.51587	8.63466	9.60791	8.37994	9.56189	1.18195	0.000503154	0.0059625
ENSMUSG00000021279	Cdc42bpb	CDC42 binding protein kinase beta	9.11695	10.3177	8.43052	9.86477	8.77374	10.0912	1.31748	0.000225814	0.00301408
ENSMUSG00000022558	Mroh1	maestro heat-like repeat family member 1	5.96204	7.19882	6.29671	7.42684	6.12937	7.31283	1.18346	0.00728208	0.0531132
ENSMUSG00000038235	F11r	F11 receptor	0	5.76016	0	5.34338	0	5.55177	5.55177	6e-08	1.89e-06
ENSMUSG00000037933	Bicd2	bicaudal D homolog 2 (Drosophila)	8.43017	9.79299	8.7481	9.65686	8.58913	9.72492	1.13579	0.000261036	0.00340821
ENSMUSG00000026640	Plxna2	plexin A2	8.68944	10.4411	9.16669	10.33	8.92807	10.3856	1.45748	4.69e-06	9.93e-05
ENSMUSG00000036327	Qsox2	quiescin Q6 sulfhydryl oxidase 2	7.15276	8.8645	7.1451	8.90972	7.14893	8.88711	1.73818	6e-08	1.89e-06
ENSMUSG00000049672	Zbtb14	zinc finger and BTB domain containing 14	8.25503	9.93416	8.24348	9.99588	8.24925	9.96502	1.71577	1.08e-09	4.57e-08
ENSMUSG00000009681	Bcr	breakpoint cluster region	7.67758	8.68434	6.95086	8.67271	7.31422	8.67852	1.36431	0.000405751	0.00495411
ENSMUSG00000034210	Efcab14	EF-hand calcium binding domain 14	7.1748	8.1864	7.268	8.41597	7.2214	8.30118	1.07979	0.00234463	0.0213315
ENSMUSG00000028973	Abcb8	ATP-binding cassette, sub-family B (MDR/TAP), member 8	6.85809	7.66641	6.09012	7.99116	6.4741	7.82878	1.35468	0.00233769	0.0212928
ENSMUSG00000028974	Dffa	DNA fragmentation factor, alpha subunit	6.81664	7.90466	6.82305	8.42929	6.81984	8.16698	1.34713	0.000395318	0.00484446
ENSMUSG00000044709	Gemin7	gem nuclear organelle associated protein 7	6.55616	7.94081	5.62194	7.88882	6.08905	7.91481	1.82576	6.38e-05	0.00102372
ENSMUSG00000044708	Kcnj10	potassium inwardly-rectifying channel, subfamily J, member 10	7.1748	8.3962	7.66835	8.44904	7.42157	8.42262	1.00105	0.00878585	0.0616303
ENSMUSG00000044707	Ccnjl	cyclin J-like	8.3501	9.52483	8.00515	9.53278	8.17763	9.5288	1.35118	9.83e-06	0.000192156
ENSMUSG00000044700	Tmem201	transmembrane protein 201	9.15348	10.2509	8.56045	10.3013	8.85697	10.2761	1.41912	1.1e-05	0.000212918
ENSMUSG00000010453	Kansl3	KAT8 regulatory NSL complex subunit 3	8.28066	9.23939	8.14	9.27321	8.21033	9.2563	1.04597	0.000547504	0.00642285
ENSMUSG00000001227	Sema6b	sema domain, transmembrane domain (TM), and cytoplasmic domain, (semaphorin) 6B	6.57286	7.57737	5.52669	7.40004	6.04977	7.4887	1.43893	0.00478416	0.0379525
ENSMUSG00000105264	Gm42716	predicted gene 42716	0	4.74625	2.64251	5.1638	1.32125	4.95502	3.63377	0.00310105	0.0268923
ENSMUSG00000084897	Gm14226	predicted gene 14226	4.29429	6.1168	4.58942	6.04315	4.44186	6.07997	1.63812	0.00616255	0.0462736
ENSMUSG00000015243	Abca1	ATP-binding cassette, sub-family A (ABC1), member 1	5.03406	7.50678	6.06773	7.35886	5.55089	7.43282	1.88193	0.00031038	0.00394652
ENSMUSG00000054499	Dedd2	death effector domain-containing DNA binding protein 2	6.03615	7.69843	5.73989	7.6929	5.88802	7.69567	1.80765	9.01e-06	0.000178471
ENSMUSG00000002257	Def6	differentially expressed in FDCP 6	0	3.33908	0	3.59548	0	3.46728	3.46728	0.0159902	0.0981056
ENSMUSG00000038453	Srcin1	SRC kinase signaling inhibitor 1	7.06106	8.45986	6.92618	8.0527	6.99362	8.25628	1.26265	0.000542758	0.00637039
ENSMUSG00000038451	Spsb2	splA/ryanodine receptor domain and SOCS box containing 2	3.57933	6.05218	2.86651	5.73528	3.22292	5.89373	2.67081	0.000141412	0.00204286
ENSMUSG00000038456	Dennd2a	DENN/MADD domain containing 2A	9.36716	10.2218	8.82352	10.0378	9.09534	10.1298	1.03444	0.00152659	0.0150435
ENSMUSG00000037306	Man1c1	mannosidase, alpha, class 1C, member 1	5.52068	6.99044	5.82243	6.8658	5.67155	6.92812	1.25656	0.00796133	0.0570114
ENSMUSG00000039414	Heatr5b	HEAT repeat containing 5B	5.65219	8.45362	6.87554	8.4941	6.26386	8.47386	2.21	6.16e-06	0.000127427
ENSMUSG00000043131	Mob1a	MOB kinase activator 1A	6.55616	8.36328	7.99332	8.6156	7.27474	8.48944	1.2147	0.0388836	0.190062
ENSMUSG00000089872	Rps6kc1	ribosomal protein S6 kinase polypeptide 1	6.21697	8.11701	5.82243	7.75769	6.0197	7.93735	1.91765	2.13e-06	4.89e-05
ENSMUSG00000089876	Tmem102	transmembrane protein 102	0	3.10428	0	4.32248	0	3.71338	3.71338	0.00494313	0.0389199
ENSMUSG00000004113	Cacna1b	calcium channel, voltage-dependent, N type, alpha 1B subunit	6.31946	8.63555	7.12356	8.70044	6.72151	8.66799	1.94648	1.98e-06	4.6e-05
ENSMUSG00000048310	Pskh1	protein serine kinase H1	7.72316	9.17257	7.29715	9.02826	7.51016	9.10041	1.59025	1.45e-06	3.46e-05
ENSMUSG00000029575	Mmab	methylmalonic aciduria (cobalamin deficiency) cblB type homolog (human)	7.73804	9.15728	7.34447	9.06712	7.54126	9.1122	1.57094	1.36e-06	3.27e-05
ENSMUSG00000036943	Rab8b	RAB8B, member RAS oncogene family	7.33996	10.43	8.83681	10.3067	8.08839	10.3684	2.27999	4.95e-06	0.000104422
ENSMUSG00000028197	Col24a1	collagen, type XXIV, alpha 1	0	3.87572	0	2.52404	0	3.19988	3.19988	0.0268833	0.144705
ENSMUSG00000035413	Tmem98	transmembrane protein 98	7.94458	8.73153	6.82305	8.58021	7.38381	8.65587	1.27206	0.00640657	0.0478137
ENSMUSG00000070047	Fat1	FAT atypical cadherin 1	10.4521	11.9674	10.098	11.7394	10.275	11.8534	1.5784	5.34e-08	1.71e-06
ENSMUSG00000033819	Ppp1r16a	protein phosphatase 1, regulatory (inhibitor) subunit 16A	6.74479	7.75028	6.31583	8.11995	6.53031	7.93512	1.40481	0.000465138	0.00558285
ENSMUSG00000028228	Cpne3	copine III	5.52068	8.49067	7.38124	8.46206	6.45096	8.47636	2.0254	0.0016258	0.015854
ENSMUSG00000073591	Pcdhb22	protocadherin beta 22	4.82696	7.4452	5.11114	7.35886	4.96905	7.40203	2.43298	8.45e-08	2.58e-06
ENSMUSG00000047153	Khnyn	KH and NYN domain containing	6.65355	7.84869	6.52745	7.67065	6.5905	7.75967	1.16916	0.00255218	0.0228629
ENSMUSG00000006494	Pdk1	pyruvate dehydrogenase kinase, isoenzyme 1	6.23806	7.56584	6.668	7.81969	6.45303	7.69277	1.23974	0.00324185	0.0277572
ENSMUSG00000095115	Itpripl2	inositol 1,4,5-triphosphate receptor interacting protein-like 2	4.44699	6.01875	5.02081	6.56155	4.7339	6.29015	1.55625	0.00810007	0.0578099
ENSMUSG00000002496	Tsc2	tuberous sclerosis 2	9.02288	9.91838	8.44362	9.89388	8.73325	9.90613	1.17289	0.000362125	0.00450488
ENSMUSG00000008690	Ncaph2	non-SMC condensin II complex, subunit H2	9.19182	10.0296	8.33066	9.51102	8.76124	9.77029	1.00905	0.0123177	0.0800809
ENSMUSG00000034295	Fhod3	formin homology 2 domain containing 3	6.29954	8.0274	6.29671	8.01785	6.29812	8.02263	1.72451	4.02e-06	8.67e-05
ENSMUSG00000041124	Msantd4	Myb/SANT-like DNA-binding domain containing 4 with coiled-coils	6.93759	8.80691	7.70507	8.36836	7.32133	8.58763	1.2663	0.00283994	0.0249618
ENSMUSG00000055430	Nap1l5	nucleosome assembly protein 1-like 5	4.02985	6.1168	5.4595	6.88526	4.74468	6.50103	1.75635	0.0116364	0.076608
ENSMUSG00000025272	Tro	trophinin	6.01187	8.37654	7.64586	8.2306	6.82887	8.30357	1.47471	0.0191319	0.112463
ENSMUSG00000036030	Prtg	protogenin	5.93647	7.19882	6.23777	7.35886	6.08712	7.27884	1.19172	0.0067592	0.0499979
ENSMUSG00000054280	Prr14l	proline rich 14-like	7.09614	8.78719	7.93886	8.79093	7.5175	8.78906	1.27156	0.00249358	0.0224326
ENSMUSG00000026213	Stk11ip	serine/threonine kinase 11 interacting protein	6.83059	7.90466	6.88837	8.23819	6.85948	8.07143	1.21195	0.00117373	0.0121511
ENSMUSG00000026211	Obsl1	obscurin-like 1	6.45171	7.09037	5.4247	6.96058	5.93821	7.02547	1.08727	0.0499544	0.227371
ENSMUSG00000075502	Kbtbd6	kelch repeat and BTB (POZ) domain containing 6	5.03406	6.26672	5.55914	6.60914	5.2966	6.43793	1.14133	0.0385607	0.188761
ENSMUSG00000038644	Pold1	polymerase (DNA directed), delta 1, catalytic subunit	7.01294	8.28108	7.37214	8.16842	7.19254	8.22475	1.03221	0.00597352	0.0451852
ENSMUSG00000026960	Arl6ip6	ADP-ribosylation factor-like 6 interacting protein 6	7.36893	8.94679	7.90138	9.31328	7.63515	9.13003	1.49488	3.87e-05	0.000655321
ENSMUSG00000042035	Igsf3	immunoglobulin superfamily, member 3	5.93647	9.20637	7.19759	9.26951	6.56703	9.23794	2.67091	6.68e-09	2.49e-07
ENSMUSG00000028528	Dnajc6	DnaJ heat shock protein family (Hsp40) member C6	6.57286	8.14826	6.83635	7.68182	6.7046	7.91504	1.21044	0.00241519	0.0218707
ENSMUSG00000032640	Chsy1	chondroitin sulfate synthase 1	9.30357	10.2811	8.77598	10.2078	9.03977	10.2445	1.20469	0.000140743	0.00203645
ENSMUSG00000005089	Slc1a2	solute carrier family 1 (glial high affinity glutamate transporter), member 2	7.49692	10.5387	9.33077	10.4847	8.41384	10.5117	2.09786	0.0427605	0.203599
ENSMUSG00000086537	Nespas	neuroendocrine secretory protein antisense	4.985	6.26672	5.11114	7.0146	5.04807	6.64066	1.59259	0.00237778	0.0216074
ENSMUSG00000043857	Mgat5b	mannoside acetylglucosaminyltransferase 5, isoenzyme B	7.00065	8.10909	6.52745	7.92688	6.76405	8.01798	1.25393	0.00134535	0.0136079
ENSMUSG00000027601	Mtfr1	mitochondrial fission regulator 1	7.46149	8.50281	6.63793	8.17634	7.04971	8.33957	1.28986	0.00238681	0.0216726
ENSMUSG00000027534	Snx16	sorting nexin 16	2.69524	5.39363	3.87133	4.88321	3.28329	5.13842	1.85513	0.0371122	0.18362
ENSMUSG00000051396	Gm45902	predicted gene 45902	5.91043	7.21367	5.99842	7.34488	5.95443	7.27927	1.32485	0.0020882	0.0194685
ENSMUSG00000042203	Tbc1d22b	TBC1 domain family, member 22B	9.08821	10.5548	7.81666	10.3564	8.45243	10.4556	2.00316	5.07e-06	0.000106545
ENSMUSG00000067150	Xpo5	exportin 5	7.82424	8.61332	6.49427	8.62141	7.15925	8.61737	1.45811	0.00410649	0.0335783
ENSMUSG00000097419	Gm26666	predicted gene, 26666	6.12939	7.16866	6.0219	7.33075	6.07564	7.2497	1.17406	0.00628615	0.0470504
ENSMUSG00000020532	Acaca	acetyl-Coenzyme A carboxylase alpha	7.73804	9.17636	7.74088	9.2282	7.73946	9.20228	1.46282	1.52e-06	3.6e-05
ENSMUSG00000020536	Llgl1	lethal giant larvae homolog 1 (Drosophila)	8.74206	10.0084	8.46946	10.0291	8.60576	10.0187	1.41298	9.4e-07	2.34e-05
ENSMUSG00000052387	Trpm3	transient receptor potential cation channel, subfamily M, member 3	7.83812	9.99988	9.03443	9.80981	8.43627	9.90485	1.46857	0.00159625	0.0156442
ENSMUSG00000039100	March6	membrane-associated ring finger (C3HC4) 6	8.08505	10.2952	8.91726	10.4831	8.50115	10.3891	1.88799	4.62e-07	1.24e-05
ENSMUSG00000023845	Lnpep	leucyl/cystinyl aminopeptidase	6.21697	9.78307	8.22337	9.62248	7.22017	9.70277	2.48261	0.0251959	0.138237
ENSMUSG00000052928	Ctif	CBP80/20-dependent translation initiation factor	8.54038	10.2705	7.85638	10.2384	8.19838	10.2545	2.05607	5.27e-10	2.31e-08
ENSMUSG00000022828	Gtf2e1	general transcription factor II E, polypeptide 1 (alpha subunit)	7.38792	8.43473	6.90108	8.32626	7.1445	8.3805	1.23599	0.000819623	0.0090383
ENSMUSG00000032841	Prr5l	proline rich 5 like	6.25885	7.5307	6.11216	7.50441	6.1855	7.51755	1.33205	0.00108416	0.0113802
ENSMUSG00000032840	2410131K14Rik	RIKEN cDNA 2410131K14 gene	7.91869	9.60586	7.76195	9.76061	7.84032	9.68324	1.84292	3.68e-10	1.65e-08
ENSMUSG00000020097	Sgpl1	sphingosine phosphate lyase 1	7.89897	8.61891	7.06826	8.60976	7.48361	8.61434	1.13072	0.00597196	0.0451852
ENSMUSG00000020099	Unc5b	unc-5 netrin receptor B	3.28726	5.28534	3.64814	5.5526	3.4677	5.41897	1.95127	0.00897605	0.0627383
ENSMUSG00000037410	Tbc1d2b	TBC1 domain family, member 2B	6.45171	7.32727	5.84892	6.99682	6.15032	7.16204	1.01172	0.0327042	0.167283
ENSMUSG00000027951	Adar	adenosine deaminase, RNA-specific	7.41595	8.01049	6.54376	8.07829	6.97986	8.04439	1.06453	0.0181406	0.108225
ENSMUSG00000026024	Als2	amyotrophic lateral sclerosis 2 (juvenile)	6.15179	8.01049	7.12356	8.38212	6.63768	8.19631	1.55863	0.000972591	0.0103629
ENSMUSG00000034290	Nek9	NIMA (never in mitosis gene a)-related expressed kinase 9	8.12522	9.25742	8.36319	9.40039	8.2442	9.32891	1.0847	0.00056186	0.00655175
ENSMUSG00000027035	Cers6	ceramide synthase 6	6.69989	8.11701	6.19711	7.19698	6.4485	7.65699	1.20849	0.00745327	0.0540698
ENSMUSG00000097330	Gm26672	predicted gene, 26672	4.71108	5.83889	4.70995	6.29673	4.71051	6.06781	1.35729	0.0197764	0.115104
ENSMUSG00000030602	Pak4	p21 protein (Cdc42/Rac)-activated kinase 4	8.39304	10.2327	7.2875	10.0181	7.84027	10.1254	2.28514	1.65e-08	5.84e-07
ENSMUSG00000031558	Slit2	slit homolog 2 (Drosophila)	6.39651	8.16364	7.39928	8.00011	6.8979	8.08187	1.18398	0.0160198	0.0982352
ENSMUSG00000015776	Med22	mediator complex subunit 22	8.01957	8.73668	7.2875	8.91447	7.65354	8.82557	1.17204	0.00239587	0.021721
ENSMUSG00000025968	Ndufs1	NADH dehydrogenase (ubiquinone) Fe-S protein 1	6.87165	8.06882	7.16632	8.00011	7.01899	8.03447	1.01548	0.00756533	0.0546957
ENSMUSG00000025969	Nrp2	neuropilin 2	5.7435	7.97607	5.4247	7.81969	5.5841	7.89788	2.31378	1.09e-08	3.99e-07
ENSMUSG00000038178	Slc43a2	solute carrier family 43, member 2	5.7727	6.47826	6.27733	7.91746	6.02501	7.19786	1.17284	0.0200516	0.116184
ENSMUSG00000032017	Grik4	glutamate receptor, ionotropic, kainate 4	5.25705	6.61876	5.15427	6.29673	5.20566	6.45775	1.25209	0.0159674	0.0980169
ENSMUSG00000036242	3632451O06Rik	RIKEN cDNA 3632451O06 gene	5.21512	6.59628	5.62194	6.76434	5.41853	6.68031	1.26178	0.0133474	0.0851583
ENSMUSG00000086181	C230034O21Rik	RIKEN cDNA C230034O21 gene	3.92972	5.5885	3.38398	5.73528	3.65685	5.66189	2.00505	0.00431643	0.0349765
ENSMUSG00000040936	Ulk4	unc-51-like kinase 4	5.7435	6.90153	4.70995	6.72168	5.22673	6.8116	1.58488	0.00501586	0.0393465
ENSMUSG00000023030	Slc11a2	solute carrier family 11 (proton-coupled divalent metal ion transporters), member 2	6.84441	8.55038	5.79544	8.22297	6.31992	8.38667	2.06675	4.89e-06	0.000103314
ENSMUSG00000003166	Dgcr2	DiGeorge syndrome critical region gene 2	8.85898	10.0042	8.57639	10.1607	8.71769	10.0824	1.36472	2.91e-06	6.51e-05
ENSMUSG00000102553	D930036K23Rik	RIKEN cDNA D930036K23 gene	0	2.47503	0	3.93128	0	3.20316	3.20316	0.0252215	0.138268
ENSMUSG00000083365	Gm12895	predicted gene 12895	1.06717	3.71803	0	3.39284	0.533587	3.55544	3.02185	0.0360847	0.179386
ENSMUSG00000042500	Ago4	argonaute RISC catalytic subunit 4	5.5547	7.61141	6.47738	7.79932	6.01604	7.70536	1.68932	0.000513235	0.006061
ENSMUSG00000056692	D17Wsu92e	DNA segment, Chr 17, Wayne State University 92, expressed	9.71991	11.0965	8.93283	11.0978	9.32637	11.0972	1.77079	3.01e-07	8.31e-06
ENSMUSG00000015363	Trabd	TraB domain containing	6.23806	7.16866	5.87494	6.96058	6.0565	7.06462	1.00812	0.0271348	0.145735
ENSMUSG00000085227	6330418K02Rik	RIKEN cDNA 6330418K02 gene	5.41354	6.29493	2.64251	6.23739	4.02802	6.26616	2.23813	0.0346464	0.17439
ENSMUSG00000047298	Kcnv2	potassium channel, subfamily V, member 2	5.0815	6.57343	5.31494	6.56155	5.19822	6.56749	1.36927	0.00763864	0.0551347
ENSMUSG00000101797	Gm29266	predicted gene 29266	4.77018	6.26672	4.65094	6.74317	4.71056	6.50495	1.79438	0.000853109	0.00933701
ENSMUSG00000022237	Ankrd33b	ankyrin repeat domain 33B	9.72925	9.99988	8.79994	10.6588	9.2646	10.3293	1.06474	0.0107522	0.072212
ENSMUSG00000030036	Mogs	mannosyl-oligosaccharide glucosidase	6.97575	8.09312	6.47738	8.00901	6.72657	8.05106	1.32449	0.000685034	0.00774437
ENSMUSG00000030031	Kbtbd8	kelch repeat and BTB (POZ) domain containing 8	2.09962	6.66271	5.23684	6.00807	3.66823	6.33539	2.66716	0.0196559	0.114659
ENSMUSG00000076258	Gm23935	predicted gene, 23935	16.7908	17.7262	16.6769	18.613	16.7339	18.1696	1.43578	0.000264233	0.00344226
ENSMUSG00000039512	Uhrf1bp1	UHRF1 (ICBP90) binding protein 1	6.25885	8.43473	6.49427	8.2153	6.37656	8.32502	1.94846	1.25e-07	3.71e-06
ENSMUSG00000022793	B4galt4	UDP-Gal:betaGlcNAc beta 1,4-galactosyltransferase, polypeptide 4	5.91043	6.86437	4.92445	6.74317	5.41744	6.80377	1.38633	0.0131478	0.084207
ENSMUSG00000022791	Tnk2	tyrosine kinase, non-receptor, 2	8.07336	9.02884	7.72666	8.82156	7.90001	8.9252	1.02519	0.00205448	0.0192232
ENSMUSG00000021687	Scamp1	secretory carrier membrane protein 1	6.95042	9.60867	7.82336	9.75797	7.38689	9.68332	2.29643	2.67e-09	1.06e-07
ENSMUSG00000042743	Sgtb	small glutamine-rich tetratricopeptide repeat (TPR)-containing, beta	5.80132	7.13785	6.17633	6.84607	5.98883	6.99196	1.00313	0.0340923	0.172009
ENSMUSG00000036862	Dchs1	dachsous 1 (Drosophila)	9.06774	10.4723	8.50738	10.5937	8.78756	10.533	1.74546	2.72e-08	9.27e-07
ENSMUSG00000042744	Hectd4	HECT domain E3 ubiquitin protein ligase 4	9.51919	10.5621	9.09656	10.4847	9.30787	10.5234	1.21553	4.92e-05	0.000811689
ENSMUSG00000035517	Tdrd7	tudor domain containing 7	4.12349	5.67688	4.82118	6.48708	4.47233	6.08198	1.60964	0.0113172	0.075057
ENSMUSG00000033910	Gucy1a3	guanylate cyclase 1, soluble, alpha 3	4.64945	7.02452	5.52669	6.67771	5.08807	6.85112	1.76305	0.00144557	0.0143787
ENSMUSG00000044375	BC027072	cDNA sequence BC027072	5.80132	7.54251	5.35246	7.68182	5.57689	7.61216	2.03527	2.11e-06	4.86e-05
ENSMUSG00000048807	Slc35e4	solute carrier family 35, member E4	3.44067	4.74625	3.06036	5.0986	3.25052	4.92243	1.67191	0.0478557	0.220527
ENSMUSG00000030600	Lrfn1	leucine rich repeat and fibronectin type III domain containing 1	8.10814	8.65743	6.98709	8.54394	7.54761	8.60068	1.05307	0.0285345	0.151395
ENSMUSG00000031557	Plekha2	pleckstrin homology domain-containing, family A (phosphoinositide binding specific) member 2	4.12349	6.45346	4.06458	6.29673	4.09403	6.37509	2.28106	6.83e-05	0.00108579
ENSMUSG00000039652	Cpeb3	cytoplasmic polyadenylation element binding protein 3	4.58507	6.59628	5.49348	6.97881	5.03928	6.78754	1.74827	0.0020125	0.0189443
ENSMUSG00000079215	Zfp664	zinc finger protein 664	10.1326	11.305	10.2536	11.1092	10.1931	11.2071	1.014	0.000347431	0.00435127
ENSMUSG00000052299	Ltn1	listerin E3 ubiquitin protein ligase 1	5.85691	8.29511	7.22818	8.17634	6.54255	8.23572	1.69318	0.00194792	0.0184139
ENSMUSG00000015501	Hivep2	human immunodeficiency virus type I enhancer binding protein 2	3.92972	6.86437	5.52669	6.3814	4.7282	6.62288	1.89468	0.00780569	0.0560689
ENSMUSG00000041044	Lrit1	leucine-rich repeat, immunoglobulin-like and transmembrane domains 1	4.29429	6.66271	4.52516	6.14353	4.40972	6.40312	1.9934	0.000424972	0.00517256
ENSMUSG00000028706	Nsun4	NOL1/NOP2/Sun domain family, member 4	5.0815	6.52663	5.11114	7.08361	5.09632	6.80512	1.7088	0.000644768	0.00736405
ENSMUSG00000040396	Abhd13	abhydrolase domain containing 13	6.65355	8.78222	7.11267	8.75436	6.88311	8.76829	1.88517	1.33e-07	3.91e-06
ENSMUSG00000088595	Gm24601	predicted gene, 24601	7.38792	8.43473	6.4603	7.65939	6.92411	8.04706	1.12295	0.0187651	0.110988
ENSMUSG00000068566	Myadm	myeloid-associated differentiation marker	7.57358	8.40269	7.37214	8.60976	7.47286	8.50623	1.03337	0.00260406	0.0232029
ENSMUSG00000033792	Atp7a	ATPase, Cu++ transporting, alpha polypeptide	4.71108	7.05782	5.27642	6.72168	4.99375	6.88975	1.896	0.000236654	0.00313724
ENSMUSG00000029778	Adcyap1r1	adenylate cyclase activating polypeptide 1 receptor 1	4.64945	5.98453	3.97119	6.72168	4.31032	6.3531	2.04278	0.000682405	0.00772465
ENSMUSG00000024074	Crim1	cysteine rich transmembrane BMP regulator 1 (chordin like)	6.33911	8.32277	7.39928	8.40926	6.8692	8.36602	1.49682	0.00171222	0.0165377
ENSMUSG00000024077	Strn	striatin, calmodulin binding protein	6.62181	9.82477	8.41287	9.48892	7.51734	9.65685	2.1395	0.0347731	0.174754
ENSMUSG00000024070	Prkd3	protein kinase D3	7.47931	9.14958	8.62703	9.08827	8.05317	9.11892	1.06575	0.0307984	0.160024
ENSMUSG00000024073	Birc6	baculoviral IAP repeat-containing 6	7.995	9.51587	8.88881	9.6932	8.44191	9.60454	1.16263	0.00498896	0.0391882
ENSMUSG00000058793	Cds2	CDP-diacylglycerol synthase (phosphatidate cytidylyltransferase) 2	8.29583	10.449	8.0572	9.91297	8.17651	10.181	2.00445	2.24e-10	1.04e-08
ENSMUSG00000027522	Stx16	syntaxin 16	7.59008	9.2858	7.68315	8.65014	7.63661	8.96797	1.33136	0.000150377	0.00214851
ENSMUSG00000005540	Fcer2a	Fc receptor, IgE, low affinity II, alpha polypeptide	5.0815	6.01875	4.31317	5.93525	4.69733	5.977	1.27966	0.0446815	0.209877
ENSMUSG00000040624	Plekhg1	pleckstrin homology domain containing, family G (with RhoGef domain) member 1	7.32032	8.70024	8.25838	8.93796	7.78935	8.8191	1.02975	0.0231965	0.130052
ENSMUSG00000040620	Dhx33	DEAH (Asp-Glu-Ala-His) box polypeptide 33	7.19651	8.03578	6.57584	8.42265	6.88617	8.22921	1.34304	0.00088305	0.0095972
ENSMUSG00000026349	Ccnt2	cyclin T2	7.49692	9.75034	8.85979	9.70967	8.17836	9.73	1.55165	0.00205322	0.0192191
ENSMUSG00000007039	Ddah2	dimethylarginine dimethylaminohydrolase 2	9.01067	10.7571	8.52802	10.717	8.76935	10.7371	1.9677	4.61e-11	2.37e-09
ENSMUSG00000079020	Slc45a4	solute carrier family 45, member 4	6.52218	7.40695	5.35246	7.03216	5.93732	7.21956	1.28224	0.0226903	0.127824
ENSMUSG00000054850	Smim10l2a	small integral membrane protein 10 like 2A	5.21512	6.37637	3.64814	5.81862	4.43163	6.09749	1.66586	0.0285772	0.151484
ENSMUSG00000022120	Rnf219	ring finger protein 219	6.45171	8.49675	6.59161	8.62141	6.52166	8.55908	2.03742	5.11e-09	1.95e-07
ENSMUSG00000025478	Dpysl4	dihydropyrimidinase-like 4	9.8794	10.5194	9.03154	10.5333	9.45547	10.5264	1.07089	0.00442846	0.0357601
ENSMUSG00000015291	Gdi1	guanosine diphosphate (GDP) dissociation inhibitor 1	9.0853	10.1522	8.4609	10.3211	8.7731	10.2366	1.46354	9.42e-06	0.000185673
ENSMUSG00000035941	Ibtk	inhibitor of Bruton agammaglobulinemia tyrosine kinase	5.45014	7.39397	6.79607	7.68182	6.12311	7.5379	1.41479	0.0177347	0.106349
ENSMUSG00000021577	Sdha	succinate dehydrogenase complex, subunit A, flavoprotein (Fp)	8.35976	9.64199	8.60388	9.4105	8.48182	9.52625	1.04443	0.000837151	0.00920117
ENSMUSG00000063077	Kif1b	kinesin family member 1B	8.94165	10.2952	9.62711	10.5563	9.28438	10.4257	1.14134	0.00177645	0.0170453
ENSMUSG00000020220	Vps13d	vacuolar protein sorting 13D	7.76008	10.0811	8.16657	9.58131	7.96332	9.83119	1.86787	3.13e-08	1.06e-06
ENSMUSG00000033453	Adamts15	a disintegrin-like and metallopeptidase (reprolysin type) with thrombospondin type 1 motif, 15	6.15179	7.85817	5.87494	7.31648	6.01337	7.58733	1.57396	0.000229799	0.00306202
ENSMUSG00000034158	Lrrc58	leucine rich repeat containing 58	8.60674	11.8035	10.4252	11.8426	9.51596	11.823	2.30708	0.0171423	0.103418
ENSMUSG00000034152	Exoc3	exocyst complex component 3	7.47931	8.60208	7.39928	8.5378	7.4393	8.56994	1.13064	0.000664628	0.00755391
ENSMUSG00000073700	Klhl21	kelch-like 21	6.15179	7.61141	4.92445	7.81969	5.53812	7.71555	2.17743	2.59e-05	0.000459017
ENSMUSG00000060862	Zbtb40	zinc finger and BTB domain containing 40	5.45014	7.05782	5.35246	7.31648	5.4013	7.18715	1.78585	7.8e-05	0.00122061
ENSMUSG00000042650	Alkbh5	alkB homolog 5, RNA demethylase	9.06479	11.0099	8.58824	10.9264	8.82651	10.9681	2.1416	5.25e-13	3.45e-11
ENSMUSG00000035206	Sppl2b	signal peptide peptidase like 2B	6.78832	7.5888	5.4595	7.57801	6.12391	7.58341	1.45949	0.0094161	0.0652281
ENSMUSG00000035202	Lars2	leucyl-tRNA synthetase, mitochondrial	6.01187	7.51879	6.4078	7.46615	6.20984	7.49247	1.28263	0.00280284	0.0247101
ENSMUSG00000043456	Zfp536	zinc finger protein 536	7.95098	9.48561	8.64604	9.36271	8.29851	9.42416	1.12565	0.00280226	0.0247101
ENSMUSG00000006373	Pgrmc1	progesterone receptor membrane component 1	8.9608	10.2418	9.49075	10.2534	9.22578	10.2476	1.02186	0.00233424	0.0212779
ENSMUSG00000042328	Hps4	HPS4, biogenesis of lysosomal organelles complex 3 subunit 2	5.41354	7.18382	4.87374	6.82607	5.14364	7.00494	1.86131	0.000162055	0.00229562
ENSMUSG00000044864	Ankrd50	ankyrin repeat domain 50	7.20724	8.62448	7.40822	8.87607	7.30773	8.75028	1.44255	2.13e-05	0.00038717
ENSMUSG00000059436	Max	Max protein	8.99837	9.81992	8.82017	10.0247	8.90927	9.9223	1.01303	0.000550589	0.00644933
ENSMUSG00000041741	Pde3a	phosphodiesterase 3A, cGMP inhibited	6.3585	8.3499	7.68315	8.12815	7.02083	8.23902	1.2182	0.031023	0.161048
ENSMUSG00000005958	Ephb3	Eph receptor B3	7.13038	8.99915	6.83635	8.83663	6.98336	8.91789	1.93453	5.06e-09	1.93e-07
ENSMUSG00000051390	Zbtb22	zinc finger and BTB domain containing 22	8.7821	9.66378	8.07975	9.8149	8.43092	9.73934	1.30842	0.000197916	0.00270671
ENSMUSG00000070056	Mfhas1	malignant fibrous histiocytoma amplified sequence 1	6.48738	8.44735	6.55989	8.07829	6.52363	8.26282	1.73919	2.55e-06	5.79e-05
ENSMUSG00000046836	Brox	BRO1 domain and CAAX motif containing	6.95042	8.47226	7.78271	8.48137	7.36657	8.47682	1.11025	0.0110573	0.0737947
ENSMUSG00000106993	Gm43417	predicted gene 43417	1.06717	4.57283	2.05189	3.39284	1.55953	3.98284	2.4233	0.0423575	0.202428
ENSMUSG00000089760	D030046N08Rik	RIKEN cDNA D030046N08 gene	7.28022	8.29511	6.4603	8.34043	6.87026	8.31777	1.44751	0.000527734	0.00621279
ENSMUSG00000050930	Map10	microtubule-associated protein 10	4.77018	6.1168	5.02081	6.4352	4.8955	6.276	1.38051	0.013213	0.084543
ENSMUSG00000036006	Ripor2	RHO family interacting cell polarization regulator 2	7.54001	8.68966	6.93857	8.59801	7.23929	8.64383	1.40454	0.000142699	0.00205891
ENSMUSG00000036002	Fam214b	family with sequence similarity 214, member B	8.20771	9.69322	7.93886	9.49527	8.07328	9.59424	1.52096	4.72e-07	1.26e-05
ENSMUSG00000015127	Unkl	unkempt family like zinc finger	6.41515	7.98475	6.68281	7.98215	6.54898	7.98345	1.43447	0.000178835	0.00248951
ENSMUSG00000021357	Exoc2	exocyst complex component 2	5.48584	7.40695	6.72633	7.54168	6.10609	7.47431	1.36823	0.017485	0.10504
ENSMUSG00000038349	Plcl1	phospholipase C-like 1	4.77018	7.65558	6.25769	7.64804	5.51393	7.65181	2.13787	0.000281045	0.00363289
ENSMUSG00000025154	Arhgap19	Rho GTPase activating protein 19	7.1748	9.25024	7.4607	9.22438	7.31775	9.23731	1.91956	1.96e-09	7.98e-08
ENSMUSG00000025153	Fasn	fatty acid synthase	9.85402	10.8844	9.41962	11.0905	9.63682	10.9874	1.35061	7.82e-06	0.000157841
ENSMUSG00000028385	Snx30	sorting nexin family member 30	5.33741	6.70536	5.92561	6.82607	5.63151	6.76571	1.13421	0.0288477	0.152406
ENSMUSG00000005338	Cadm3	cell adhesion molecule 3	10.6568	11.8909	9.99055	11.7784	10.3237	11.8346	1.51098	4.65e-06	9.86e-05
ENSMUSG00000004069	Dnaja3	DnaJ heat shock protein family (Hsp40) member A3	6.71501	7.55422	6.0219	7.58992	6.36845	7.57207	1.20362	0.0071606	0.0524354
ENSMUSG00000006517	Mvd	mevalonate (diphospho) decarboxylase	6.12939	6.57343	5.06668	7.03216	5.59804	6.8028	1.20476	0.0381653	0.187296
ENSMUSG00000009772	Nuak2	NUAK family, SNF1-like kinase, 2	8.1024	8.71597	7.11267	8.6272	7.60753	8.67159	1.06405	0.0168781	0.10221
ENSMUSG00000029245	Epha5	Eph receptor A5	7.07285	8.95122	8.33535	8.73839	7.7041	8.84481	1.14071	0.0310547	0.161176
ENSMUSG00000029249	Rest	RE1-silencing transcription factor	7.02512	8.82636	8.23847	8.86631	7.6318	8.84634	1.21454	0.0168069	0.101923
ENSMUSG00000039678	Tbc1d13	TBC1 domain family, member 13	8.29079	9.64473	7.54414	9.95732	7.91746	9.80103	1.88356	1.41e-07	4.13e-06
ENSMUSG00000075470	Alg10b	asparagine-linked glycosylation 10B (alpha-1,2-glucosyltransferase)	7.00065	9.30326	8.50738	9.46001	7.75401	9.38164	1.62762	0.00275944	0.0244104
ENSMUSG00000051054	1700014D04Rik	RIKEN cDNA 1700014D04 gene	0	3.54096	0	3.15702	0	3.34899	3.34899	0.0229629	0.129018
ENSMUSG00000036636	Clcn7	chloride channel, voltage-sensitive 7	6.50488	7.4452	5.82243	6.99682	6.16365	7.22101	1.05735	0.0281565	0.149934
ENSMUSG00000038564	Ift172	intraflagellar transport 172	5.82938	7.31355	5.99842	7.33075	5.9139	7.32215	1.40825	0.00105355	0.0111089
ENSMUSG00000037275	Gemin5	gem nuclear organelle associated protein 5	6.57286	8.23087	6.35332	8.22297	6.46309	8.22692	1.76383	1.2e-06	2.92e-05
ENSMUSG00000102742	Pcdhga11	protocadherin gamma subfamily A, 11	5.96204	6.40252	4.31317	7.03216	5.13761	6.71734	1.57974	0.025942	0.140808
ENSMUSG00000022507	1810013L24Rik	RIKEN cDNA 1810013L24 gene	6.45171	8.83599	8.08533	8.72225	7.26852	8.77912	1.5106	0.0126825	0.0819463
ENSMUSG00000042178	Armc5	armadillo repeat containing 5	4.71108	7.39397	5.62194	6.99682	5.16651	7.19539	2.02888	0.000120878	0.00179396
ENSMUSG00000103834	Gm37613	predicted gene, 37613	0	4.74625	2.64251	3.93128	1.32125	4.33877	3.01751	0.0394557	0.192215
ENSMUSG00000020612	Prkar1a	protein kinase, cAMP dependent regulatory, type I, alpha	9.63898	10.6342	9.15612	10.5623	9.39755	10.5983	1.20072	9.27e-05	0.00141976
ENSMUSG00000020053	Igf1	insulin-like growth factor 1	4.37266	6.57343	5.82243	6.4352	5.09754	6.50432	1.40678	0.0492342	0.225014
ENSMUSG00000048921	Zfp689	zinc finger protein 689	6.15179	8.11701	5.27642	7.76821	5.71411	7.94261	2.22851	8.99e-07	2.24e-05
ENSMUSG00000048920	Fkrp	fukutin related protein	6.95042	7.98475	5.99842	7.79932	6.47442	7.89204	1.41762	0.0023676	0.0215316
ENSMUSG00000071226	Cecr2	CECR2, histone acetyl-lysine reader	8.3306	9.79546	9.26343	9.93881	8.79701	9.86714	1.07012	0.0114611	0.0757531
ENSMUSG00000026614	Slc30a10	solute carrier family 30, member 10	6.83059	8.41559	7.68315	8.12815	7.25687	8.27187	1.015	0.0268804	0.144705
ENSMUSG00000034247	Plekhm1	pleckstrin homology domain containing, family M (with RUN domain) member 1	7.53149	8.3159	6.80962	8.19984	7.17056	8.25787	1.08732	0.00810686	0.0578407
ENSMUSG00000008855	Hdac5	histone deacetylase 5	8.41636	9.44528	7.96332	9.48574	8.18984	9.46551	1.27567	6.55e-05	0.00104781
ENSMUSG00000046731	Kctd11	potassium channel tetramerisation domain containing 11	5.41354	5.98453	3.97119	6.40855	4.69236	6.19654	1.50418	0.0378208	0.186075
ENSMUSG00000041852	Tcf20	transcription factor 20	10.5773	11.8641	10.4981	11.6947	10.5377	11.7794	1.24167	5.42e-06	0.00011332
ENSMUSG00000032320	Rcn2	reticulocalbin 2	8.07922	9.1223	8.09089	9.61958	8.08505	9.37094	1.28589	7.72e-05	0.00121018
ENSMUSG00000022533	Atp13a3	ATPase type 13A3	5.5547	8.23087	7.47778	8.40253	6.51624	8.3167	1.80046	0.00871736	0.0613342
ENSMUSG00000033365	Ipo13	importin 13	6.78832	7.93186	6.57584	8.14439	6.68208	8.03812	1.35604	0.000287817	0.00370606
ENSMUSG00000033364	Usp37	ubiquitin specific peptidase 37	6.96315	8.83118	8.13462	8.83162	7.54888	8.8314	1.28252	0.00928727	0.0644666
ENSMUSG00000037846	Rtkn2	rhotekin 2	7.65424	8.47226	7.56026	8.90019	7.60725	8.68623	1.07898	0.00171192	0.0165377
ENSMUSG00000060716	Plekhh1	pleckstrin homology domain containing, family H (with MyTH4 domain) member 1	3.82211	5.04083	3.87133	5.64683	3.84672	5.34383	1.49711	0.0385077	0.18862
ENSMUSG00000030103	Bhlhe40	basic helix-loop-helix family, member e40	2.09962	5.76016	3.64814	4.53454	2.87388	5.14735	2.27347	0.01534	0.0949416
ENSMUSG00000027852	Nras	neuroblastoma ras oncogene	8.91571	11.0559	9.1798	11.0936	9.04775	11.0748	2.027	7.41e-13	4.78e-11
ENSMUSG00000026893	Gca	grancalcin	2.09962	5.39363	2.64251	4.4324	2.37106	4.91302	2.54195	0.00508191	0.0397711
ENSMUSG00000048482	Bdnf	brain derived neurotrophic factor	0	4.14725	0	3.39284	0	3.77005	3.77005	0.00478451	0.0379525
ENSMUSG00000048483	Zdhhc22	zinc finger, DHHC-type containing 22	4.64945	5.67688	4.06458	6.20678	4.35701	5.94183	1.58481	0.0125962	0.0814341
ENSMUSG00000035666	Gtf3c4	general transcription factor IIIC, polypeptide 4	8.20771	9.42629	7.73379	9.33467	7.97075	9.38048	1.40973	1.37e-05	0.000261114
ENSMUSG00000026796	Fam129b	family with sequence similarity 129, member B	6.58936	7.62258	5.82243	8.01785	6.20589	7.82021	1.61432	0.000311955	0.00396439
ENSMUSG00000026792	Lrsam1	leucine rich repeat and sterile alpha motif containing 1	6.23806	6.76706	5.4247	7.03216	5.83138	6.89961	1.06824	0.0428365	0.203711
ENSMUSG00000040479	Dgkz	diacylglycerol kinase zeta	7.9637	8.85978	7.51961	8.69494	7.74165	8.77736	1.03571	0.00287512	0.0252046
ENSMUSG00000047126	Cltc	clathrin, heavy polypeptide (Hc)	7.68528	9.51887	8.76559	9.4437	8.22543	9.48128	1.25585	0.00563364	0.043177
ENSMUSG00000077506	Scarna9	small Cajal body-specific RNA 9	4.29429	8.08506	4.92445	8.63297	4.60937	8.35902	3.74965	6.04e-17	5.69e-15
ENSMUSG00000006134	Crkl	v-crk avian sarcoma virus CT10 oncogene homolog-like	8.25503	9.25742	8.2132	9.58131	8.23412	9.41937	1.18525	0.000122748	0.00181709
ENSMUSG00000053950	Adnp2	ADNP homeobox 2	7.06106	8.85978	7.31627	8.40253	7.18867	8.63116	1.44249	6.13e-05	0.000986318
ENSMUSG00000078853	Igtp	interferon gamma induced GTPase	0	4.47762	0	3.15702	0	3.81732	3.81732	0.00307632	0.0267076
ENSMUSG00000017493	Igfbp4	insulin-like growth factor binding protein 4	9.62504	10.0627	8.56844	10.1324	9.09674	10.0976	1.00085	0.0206695	0.118762
ENSMUSG00000079104	Prps1l3	phosphoribosyl pyrophosphate synthetase 1-like 3	4.64945	7.51879	6.31583	7.49176	5.48264	7.50528	2.02264	0.00168498	0.0163355
ENSMUSG00000079109	Pms2	postmeiotic segregation increased 2 (S. cerevisiae)	6.69989	8.2162	7.06826	7.88882	6.88407	8.05251	1.16843	0.00289909	0.0253779
ENSMUSG00000025224	Gbf1	golgi-specific brefeldin A-resistance factor 1	8.27557	9.03303	7.5998	8.8712	7.93769	8.95212	1.01443	0.00674415	0.0499025
ENSMUSG00000023972	Ptk7	PTK7 protein tyrosine kinase 7	7.70813	8.72117	7.58412	8.79093	7.64612	8.75605	1.10993	0.000606323	0.00698993
ENSMUSG00000023978	Prph2	peripherin 2	7.89897	8.68966	7.25815	8.98832	7.57856	8.83899	1.26043	0.000755703	0.00841292
ENSMUSG00000102869	2900097C17Rik	RIKEN cDNA 2900097C17 gene	10.2644	13.1397	11.3344	13.2713	10.7994	13.2055	2.40609	5.38e-09	2.03e-07
ENSMUSG00000019979	Apaf1	apoptotic peptidase activating factor 1	5.58793	7.2997	6.045	7.74709	5.81646	7.52339	1.70693	0.000142522	0.00205763
ENSMUSG00000030319	Cand2	cullin-associated and neddylation-dissociated 2 (putative)	7.38792	8.44106	7.06826	8.0527	7.22809	8.24688	1.01878	0.00612093	0.0460833
ENSMUSG00000049659	Aftph	aftiphilin	6.10664	8.17885	7.37214	7.78903	6.73939	7.98394	1.24455	0.0265525	0.14342
ENSMUSG00000028514	Usp24	ubiquitin specific peptidase 24	5.7137	8.2526	7.21806	8.19205	6.46588	8.22233	1.75645	0.00231167	0.0211217
ENSMUSG00000042042	Csgalnact2	chondroitin sulfate N-acetylgalactosaminyltransferase 2	4.77018	6.80678	5.87494	7.45316	5.32256	7.12997	1.80741	0.00156954	0.0154083
ENSMUSG00000034940	Synrg	synergin, gamma	7.69294	9.48866	8.19266	9.22438	7.9428	9.35652	1.41372	4.31e-05	0.000724919
ENSMUSG00000044948	Cfap43	cilia and flagella associated protein 43	6.68461	8.15597	6.09012	8.12815	6.38736	8.14206	1.75469	9.68e-06	0.00018988
ENSMUSG00000026620	Mark1	MAP/microtubule affinity regulating kinase 1	7.74543	8.72117	7.55222	8.77014	7.64882	8.74566	1.09683	0.000775162	0.00860493
ENSMUSG00000023473	Celsr3	cadherin, EGF LAG seven-pass G-type receptor 3	7.88566	8.9289	7.57621	8.87607	7.73094	8.90249	1.17155	0.000324032	0.00410001
ENSMUSG00000027630	Tbl1xr1	transducin (beta)-like 1X-linked receptor 1	7.01294	9.6282	7.99925	9.12556	7.50609	9.37688	1.87079	1.37e-05	0.000261278
ENSMUSG00000040537	Adam22	a disintegrin and metallopeptidase domain 22	7.37846	9.15728	8.45229	9.2358	7.91537	9.19654	1.28117	0.0051313	0.0401307
ENSMUSG00000047085	Lrrc4b	leucine rich repeat containing 4B	8.12522	8.82636	7.09063	8.94261	7.60793	8.88448	1.27656	0.00359461	0.0301856
ENSMUSG00000047888	Tnrc6b	trinucleotide repeat containing 6b	8.37412	10.4738	9.68157	10.3494	9.02784	10.4116	1.38378	0.00500965	0.0393242
ENSMUSG00000001098	Kctd10	potassium channel tetramerisation domain containing 10	7.73804	8.28108	7.03403	8.72225	7.38604	8.50166	1.11563	0.00603998	0.0455731
ENSMUSG00000041341	Atg2b	autophagy related 2B	7.47931	8.85978	7.06826	8.81142	7.27379	8.8356	1.56182	3.93e-06	8.49e-05
ENSMUSG00000029009	Mthfr	5,10-methylenetetrahydrofolate reductase	7.02512	7.70895	6.31583	8.51923	6.67047	8.11409	1.44362	0.00119203	0.0122912
ENSMUSG00000032308	Ulk3	unc-51-like kinase 3	5.85691	7.2997	5.73989	7.24296	5.7984	7.27133	1.47293	0.000650207	0.00741528
ENSMUSG00000032300	1700017B05Rik	RIKEN cDNA 1700017B05 gene	6.80255	7.71939	5.99842	7.77866	6.40048	7.74903	1.34854	0.00275431	0.0243743
ENSMUSG00000021775	Nr1d2	nuclear receptor subfamily 1, group D, member 2	6.60568	8.80691	8.17183	9.00176	7.38875	8.90433	1.51558	0.00920856	0.0640374
ENSMUSG00000032878	Ccdc85a	coiled-coil domain containing 85A	3.70582	7.22837	5.90049	7.04952	4.80316	7.13895	2.33579	0.00312279	0.0270406
ENSMUSG00000027340	Slc23a2	solute carrier family 23 (nucleobase transporters), member 2	7.13038	8.10909	6.95086	8.00901	7.04062	8.05905	1.01843	0.00532709	0.0412201
ENSMUSG00000077394	Gm24339	predicted gene, 24339	10.3456	13.0312	10.1281	13.8282	10.2368	13.4297	3.19292	1.2e-20	1.59e-18
ENSMUSG00000073678	Pgap1	post-GPI attachment to proteins 1	4.88159	7.51879	6.86259	7.62507	5.87209	7.57193	1.69984	0.0248045	0.136829
ENSMUSG00000004929	Thop1	thimet oligopeptidase 1	6.19557	6.97309	5.52669	6.82607	5.86113	6.89958	1.03845	0.0394214	0.192128
ENSMUSG00000032468	Armc8	armadillo repeat containing 8	6.77396	8.88319	8.14	8.75436	7.45698	8.81877	1.3618	0.0116404	0.0766125
ENSMUSG00000040183	Ankrd6	ankyrin repeat domain 6	4.21142	6.55022	4.58942	5.69173	4.40042	6.12098	1.72056	0.00469932	0.0374223
ENSMUSG00000039000	Ube3c	ubiquitin protein ligase E3C	7.60639	8.73668	7.15575	8.73839	7.38107	8.73753	1.35647	8.97e-05	0.00138063
ENSMUSG00000066151	Fkbp15	FK506 binding protein 15	6.63777	7.76042	6.47738	7.58992	6.55758	7.67517	1.11759	0.00456657	0.0366345
ENSMUSG00000053646	Plxnb1	plexin B1	9.44631	10.637	9.04593	10.7156	9.24612	10.6763	1.43017	1.11e-06	2.72e-05
ENSMUSG00000002222	Rmnd5a	required for meiotic nuclear division 5 homolog A	7.71567	9.73499	8.94516	9.83505	8.33041	9.78502	1.45461	0.00218658	0.0202242
ENSMUSG00000002227	Mov10	Moloney leukemia virus 10	5.85691	6.70536	4.87374	6.3814	5.36532	6.54338	1.17806	0.0466607	0.21656
ENSMUSG00000030084	Plxna1	plexin A1	9.72178	10.4458	8.88562	10.4061	9.3037	10.4259	1.12225	0.0025677	0.0229491
ENSMUSG00000078349	AW011738	expressed sequence AW011738	4.44699	7.2997	5.7113	7.10036	5.07914	7.20003	2.12089	0.000248804	0.00326862
ENSMUSG00000025938	Slco5a1	solute carrier organic anion transporter family, member 5A1	6.39651	8.96006	6.83635	9.15392	6.61643	9.05699	2.44056	3.09e-12	1.84e-10
ENSMUSG00000029636	Wasf3	WAS protein family, member 3	10.166	11.9156	10.221	12.0765	10.1935	11.996	1.80248	3.04e-11	1.62e-09
ENSMUSG00000038181	Chpf2	chondroitin polymerizing factor 2	6.3585	7.40695	5.90049	7.38644	6.1295	7.3967	1.2672	0.00350971	0.0296112
ENSMUSG00000103976	Gm37677	predicted gene, 37677	0	3.54096	0	2.52404	0	3.0325	3.0325	0.0477541	0.220146
ENSMUSG00000020716	Nf1	neurofibromin 1	7.69294	9.6282	8.88881	9.25463	8.29087	9.44141	1.15054	0.0201574	0.116623
ENSMUSG00000035469	Rcbtb1	regulator of chromosome condensation (RCC1) and BTB (POZ) domain containing protein 1	6.31946	9.61428	7.68315	9.62538	7.00131	9.61983	2.61852	2.85e-08	9.67e-07
ENSMUSG00000069874	Irgm2	immunity-related GTPase family M member 2	0	3.10428	0	3.15702	0	3.13065	3.13065	0.0435571	0.205935
ENSMUSG00000028273	Pdlim5	PDZ and LIM domain 5	5.96204	8.2454	6.69746	8.08672	6.32975	8.16606	1.8363	1.66e-05	0.000309707
ENSMUSG00000028278	Rragd	Ras-related GTP binding D	6.15179	6.59628	5.27642	7.81969	5.71411	7.20799	1.49388	0.00545765	0.0420075
ENSMUSG00000032115	Hyou1	hypoxia up-regulated 1	8.54038	9.14958	7.19759	8.90497	7.86898	9.02727	1.15829	0.0253963	0.138847
ENSMUSG00000032114	Slc37a4	solute carrier family 37 (glucose-6-phosphate transporter), member 4	4.37266	6.14806	4.58942	5.5526	4.48104	5.85033	1.36929	0.0281541	0.149934
ENSMUSG00000060510	Zfp266	zinc finger protein 266	7.67758	9.8863	9.20822	9.93881	8.4429	9.91256	1.46966	0.00778021	0.0559547
ENSMUSG00000003863	Ppfia3	protein tyrosine phosphatase, receptor type, f polypeptide (PTPRF), interacting protein (liprin), alpha 3	5.65219	7.22837	5.79544	7.28752	5.72381	7.25795	1.53414	0.000457044	0.00549984
ENSMUSG00000040964	Arhgef10l	Rho guanine nucleotide exchange factor (GEF) 10-like	7.70813	9.04138	6.84953	9.01064	7.27883	9.02601	1.74718	7.34e-06	0.000148932
ENSMUSG00000085511	Gm11738	predicted gene 11738	2.92066	4.14725	0	4.95863	1.46033	4.55294	3.09261	0.0314828	0.162855
ENSMUSG00000003282	Plag1	pleiomorphic adenoma gene 1	5.52068	6.82623	5.62194	6.76434	5.57131	6.79529	1.22398	0.0103138	0.0699114
ENSMUSG00000074582	Arfgef2	ADP-ribosylation factor guanine nucleotide-exchange factor 2 (brefeldin A-inhibited)	5.98717	7.80032	6.4078	8.07829	6.19749	7.9393	1.74182	1.96e-05	0.000358551
ENSMUSG00000022175	Lrp10	low-density lipoprotein receptor-related protein 10	6.50488	7.61141	6.045	7.35886	6.27494	7.48513	1.21019	0.00486042	0.0383606
ENSMUSG00000039633	Lonrf1	LON peptidase N-terminal domain and ring finger 1	4.82696	7.78051	5.11114	7.62507	4.96905	7.70279	2.73374	3.52e-10	1.58e-08
ENSMUSG00000078584	AU022252	expressed sequence AU022252	8.76404	9.84637	8.98153	9.92007	8.87278	9.88322	1.01043	0.000701537	0.00791177
ENSMUSG00000067430	Zfp763	zinc finger protein 763	3.82211	6.57343	5.65235	6.46137	4.73723	6.5174	1.78018	0.0246326	0.136106
ENSMUSG00000047248	C2cd3	C2 calcium-dependent domain containing 3	8.0317	9.20265	8.07975	9.09664	8.05572	9.14964	1.09392	0.000369503	0.00457615
ENSMUSG00000052724	Gm9888	predicted gene 9888	2.69524	5.04083	2.05189	5.34338	2.37357	5.19211	2.81854	0.00112468	0.011716
ENSMUSG00000054764	Mtnr1a	melatonin receptor 1A	4.58507	6.61876	4.92445	6.53715	4.75476	6.57796	1.8232	0.000609392	0.00701155
ENSMUSG00000028530	Jak1	Janus kinase 1	6.62181	8.17126	6.44301	7.60173	6.53241	7.8865	1.35408	0.000719977	0.00809627
ENSMUSG00000036707	Cab39	calcium binding protein 39	7.71567	9.34769	8.59608	9.27321	8.15587	9.31045	1.15458	0.00552201	0.042405
ENSMUSG00000112309	AC166359.1	---	2.09962	3.87572	0	4.0738	1.04981	3.97476	2.92495	0.0479666	0.220951
ENSMUSG00000031959	Wdr59	WD repeat domain 59	5.33741	7.76042	5.62194	7.71483	5.47968	7.73763	2.25795	6.59e-08	2.07e-06
ENSMUSG00000031955	Bcar1	breast cancer anti-estrogen resistance 1	8.35976	9.14184	7.61532	8.87607	7.98754	9.00896	1.02142	0.00834864	0.0592038
ENSMUSG00000043794	D830025C05Rik	RIKEN cDNA D830025C05 gene	2.09962	4.74625	2.05189	4.62992	2.07576	4.68808	2.61233	0.00729274	0.053153
ENSMUSG00000069114	Zbtb10	zinc finger and BTB domain containing 10	6.23806	8.50281	7.80994	8.34746	7.024	8.42514	1.40114	0.0220927	0.125244
ENSMUSG00000025742	Prps2	phosphoribosyl pyrophosphate synthetase 2	5.7727	7.35432	6.15526	7.06667	5.96398	7.21049	1.24651	0.00617559	0.0463566
ENSMUSG00000038390	Gpr162	G protein-coupled receptor 162	8.18073	9.63924	7.95114	9.63977	8.06594	9.63951	1.57357	8.51e-08	2.59e-06
ENSMUSG00000024908	Ppp6r3	protein phosphatase 6, regulatory subunit 3	7.86548	9.49171	8.96346	9.54506	8.41447	9.51839	1.10392	0.0181545	0.108244
ENSMUSG00000024901	Peli3	pellino 3	6.83059	9.07429	7.17682	8.70044	7.0037	8.88737	1.88366	9.38e-08	2.84e-06
ENSMUSG00000050310	Rictor	RPTOR independent companion of MTOR, complex 2	7.08454	8.85031	8.0343	9.08406	7.55942	8.96719	1.40777	0.0012144	0.0124836
ENSMUSG00000004383	Large1	LARGE xylosyl- and glucuronyltransferase 1	6.95042	7.5307	6.3347	7.83978	6.64256	7.68524	1.04268	0.0166281	0.101168
ENSMUSG00000026502	Desi2	desumoylating isopeptidase 2	7.07285	9.04968	6.99897	9.18566	7.03591	9.11767	2.08176	4.36e-11	2.26e-09
ENSMUSG00000047003	Zfp41	zinc finger protein 41	8.69327	10.1032	8.37235	9.89388	8.53281	9.99853	1.46572	8.29e-07	2.08e-05
ENSMUSG00000047910	Pcdhb16	protocadherin beta 16	4.71108	6.57343	4.70995	6.4352	4.71051	6.50432	1.7938	0.000728901	0.00816795
ENSMUSG00000097340	Gm26617	predicted gene, 26617	5.12743	6.59628	3.06036	5.5526	4.0939	6.07444	1.98054	0.0226373	0.127622
ENSMUSG00000080078	Gm15583	predicted gene 15583	6.06003	7.68784	5.90049	7.45316	5.98026	7.5705	1.59024	0.00011161	0.00167021
ENSMUSG00000090115	Usp49	ubiquitin specific peptidase 49	4.985	7.35432	6.69746	8.15244	5.84123	7.75338	1.91215	0.00356803	0.0299948
ENSMUSG00000055652	Klhl25	kelch-like 25	6.57286	7.76042	6.23777	7.73642	6.40532	7.74842	1.34311	0.000722836	0.00812222
ENSMUSG00000022863	Btg3	B cell translocation gene 3	5.17194	6.64091	4.82118	6.74317	4.99656	6.69204	1.69548	0.000865227	0.00942984
ENSMUSG00000056306	Sertm1	serine rich and transmembrane domain containing 1	0	2.47503	0	4.32248	0	3.39876	3.39876	0.0109621	0.0732429
ENSMUSG00000023830	Igf2r	insulin-like growth factor 2 receptor	6.81664	8.67364	7.07949	8.58617	6.94806	8.6299	1.68184	1.12e-06	2.74e-05
ENSMUSG00000038807	Rap1gap2	RAP1 GTPase activating protein 2	6.21697	7.07419	5.76793	7.14948	5.99245	7.11183	1.11938	0.0145497	0.0912089
ENSMUSG00000103472	Pcdhga7	protocadherin gamma subfamily A, 7	5.12743	7.15334	5.55914	7.24296	5.34329	7.19815	1.85486	7.26e-05	0.00114833
ENSMUSG00000021994	Wnt5a	wingless-type MMTV integration site family, member 5A	4.02985	6.76706	5.35246	6.58554	4.69116	6.6763	1.98514	0.00202503	0.0190392
ENSMUSG00000021990	Spata13	spermatogenesis associated 13	7.93815	9.46714	7.67577	9.18566	7.80696	9.3264	1.51944	1.35e-06	3.23e-05
ENSMUSG00000049516	Spty2d1	SPT2, Suppressor of Ty, domain containing 1 (S. cerevisiae)	4.37266	6.80678	6.06773	6.80578	5.2202	6.80628	1.58608	0.0317095	0.163702
ENSMUSG00000038020	Rapgefl1	Rap guanine nucleotide exchange factor (GEF)-like 1	5.7435	8.01897	6.06773	8.06128	5.90562	8.04012	2.13451	5.86e-08	1.86e-06
ENSMUSG00000048756	Foxo3	forkhead box O3	8.88261	10.0525	8.54433	10.1506	8.71347	10.1015	1.38808	2.35e-06	5.36e-05
ENSMUSG00000069094	Pde7a	phosphodiesterase 7A	6.50488	8.86919	7.7195	8.94261	7.11219	8.9059	1.79371	0.000183966	0.00255181
ENSMUSG00000045751	Mms22l	MMS22-like, DNA repair protein	6.12939	7.43256	6.06773	7.54168	6.09856	7.48712	1.38856	0.000732019	0.00819223
ENSMUSG00000045287	Rtn4rl1	reticulon 4 receptor-like 1	7.53149	8.30207	6.57584	7.90797	7.05367	8.10502	1.05136	0.0253068	0.138552
ENSMUSG00000026339	Ccdc93	coiled-coil domain containing 93	5.58793	7.45773	6.65305	7.28752	6.12049	7.37263	1.25214	0.0222167	0.125824
ENSMUSG00000061393	Acvr2b	activin receptor IIB	6.25885	8.17126	7.56826	8.04406	6.91355	8.10766	1.19411	0.0358036	0.178521
ENSMUSG00000113425	AC159813.1	---	0	2.8237	0	3.77313	0	3.29841	3.29841	0.0233198	0.130642
ENSMUSG00000041268	Dmxl2	Dmx-like 2	6.69989	8.81179	8.33066	8.83162	7.51527	8.82171	1.30643	0.0370033	0.183172
ENSMUSG00000110423	Gm45736	predicted gene 45736	0	4.97263	3.06036	5.89741	1.53018	5.43502	3.90484	0.000750576	0.00837581
ENSMUSG00000066357	Wdr6	WD repeat domain 6	8.12522	9.92742	7.63829	10.04	7.88175	9.98369	2.10194	1.32e-11	7.29e-10
ENSMUSG00000036995	Asap3	ArfGAP with SH3 domain, ankyrin repeat and PH domain 3	3.44067	6.80678	4.65094	6.14353	4.04581	6.47516	2.42935	0.000222925	0.00298919
ENSMUSG00000036990	Otud4	OTU domain containing 4	6.78832	8.81179	8.31649	8.81142	7.55241	8.81161	1.2592	0.0353983	0.177067
ENSMUSG00000057751	Megf6	multiple EGF-like-domains 6	5.25705	6.57343	5.55914	6.46137	5.4081	6.5174	1.10931	0.0323365	0.165874
ENSMUSG00000020790	Ankfy1	ankyrin repeat and FYVE domain containing 1	6.19557	7.99339	6.93857	7.84972	6.56707	7.92156	1.35448	0.00232335	0.0212035
ENSMUSG00000025318	Jph3	junctophilin 3	4.64945	6.34973	4.31317	5.1638	4.48131	5.75676	1.27545	0.0429326	0.204002
ENSMUSG00000068299	Nat8f4	N-acetyltransferase 8 (GCN5-related) family member 4	5.17194	6.32259	4.06458	5.64683	4.61826	5.98471	1.36645	0.0468957	0.217304
ENSMUSG00000068742	Cry2	cryptochrome 2 (photolyase-like)	7.77459	9.62543	7.19759	9.17779	7.48609	9.40161	1.91552	5.51e-08	1.76e-06
ENSMUSG00000022946	Dopey2	dopey family member 2	7.11905	7.74006	6.09012	7.83978	6.60458	7.78992	1.18533	0.0163297	0.099769
ENSMUSG00000027883	Gpsm2	G-protein signalling modulator 2 (AGS3-like, C. elegans)	7.74543	9.38425	8.156	9.20128	7.95071	9.29276	1.34205	5.61e-05	0.000911396
ENSMUSG00000026135	Zfp142	zinc finger protein 142	6.91157	8.19391	7.11267	7.84972	7.01212	8.02182	1.00969	0.0080636	0.0575672
ENSMUSG00000046380	Jrk	jerky	6.57286	7.86759	6.06773	7.84972	6.32029	7.85866	1.53836	0.000144465	0.00207924
ENSMUSG00000105071	Gm43336	predicted gene 43336	3.70582	6.86437	4.06458	6.60914	3.8852	6.73676	2.85156	2.86e-07	7.95e-06
ENSMUSG00000059970	Hspa2	heat shock protein 2	5.45014	7.02452	5.87494	7.14948	5.66254	7.087	1.42446	0.00244546	0.0220763
ENSMUSG00000032786	Alas1	aminolevulinic acid synthase 1	6.19557	7.28571	5.90049	6.97881	6.04803	7.13226	1.08423	0.0155106	0.0957414
ENSMUSG00000027742	Cog6	component of oligomeric golgi complex 6	6.80255	7.51879	5.92561	7.97308	6.36408	7.74593	1.38186	0.00337986	0.0286919
ENSMUSG00000034708	Grn	granulin	7.47043	8.26691	6.17633	8.38212	6.82338	8.32452	1.50113	0.00329722	0.0281748
ENSMUSG00000050908	Tvp23a	trans-golgi network vesicle protein 23A	6.62181	7.51879	5.4247	7.8694	6.02326	7.6941	1.67084	0.00142871	0.0142596
ENSMUSG00000074811	Hps6	HPS6, biogenesis of lysosomal organelles complex 2 subunit 3	3.28726	4.97263	3.23123	4.95863	3.25924	4.96563	1.70639	0.0399773	0.194021
ENSMUSG00000036782	Klhl13	kelch-like 13	5.03406	7.1222	5.87494	6.84607	5.4545	6.98413	1.52963	0.00411225	0.0336136
ENSMUSG00000018999	Slc35b4	solute carrier family 35, member B4	6.52218	8.01897	6.27733	7.87914	6.39975	7.94906	1.5493	4.91e-05	0.000811363
ENSMUSG00000020961	Ston2	stonin 2	8.81053	10.6534	9.73759	10.6317	9.27406	10.6425	1.36848	0.000641631	0.0073318
ENSMUSG00000048039	Isg20l2	interferon stimulated exonuclease gene 20-like 2	8.34039	9.27522	7.78271	9.40039	8.06155	9.33781	1.27626	0.000162878	0.00230308
ENSMUSG00000031337	Mtm1	X-linked myotubular myopathy gene 1	1.67385	4.26598	0	3.93128	0.836925	4.09863	3.26171	0.0148015	0.0923192
ENSMUSG00000019647	Sema6a	sema domain, transmembrane domain (TM), and cytoplasmic domain, (semaphorin) 6A	8.81755	9.48561	7.72666	9.3382	8.27211	9.4119	1.1398	0.00999677	0.0684986
ENSMUSG00000021366	Hivep1	human immunodeficiency virus type I enhancer binding protein 1	8.41636	9.87234	8.99049	9.73134	8.70342	9.80184	1.09841	0.00160664	0.0157196
ENSMUSG00000029174	Tbc1d1	TBC1 domain family, member 1	6.63777	7.40695	5.97455	7.42684	6.30616	7.4169	1.11073	0.0148891	0.0927641
ENSMUSG00000022475	Hdac7	histone deacetylase 7	7.9763	8.72117	6.97511	8.70044	7.47571	8.71081	1.2351	0.004842	0.0382656
ENSMUSG00000020181	Nav3	neuron navigator 3	5.45014	7.05782	5.90049	6.88526	5.67532	6.97154	1.29622	0.00721468	0.0527445
ENSMUSG00000032010	Usp2	ubiquitin specific peptidase 2	4.37266	6.1168	5.11114	6.00807	4.7419	6.06244	1.32053	0.0367972	0.182307
ENSMUSG00000054942	Miga1	mitoguardin 1	6.66917	8.08506	7.11267	7.94554	6.89092	8.0153	1.12438	0.0046899	0.0373799
ENSMUSG00000043885	Slc36a4	solute carrier family 36 (proton/amino acid symporter), member 4	6.45171	8.11701	6.86259	8.26072	6.65715	8.18886	1.53171	6.73e-05	0.00107248
ENSMUSG00000043881	Kbtbd7	kelch repeat and BTB (POZ) domain containing 7	4.88159	7.79045	6.06773	7.60173	5.47466	7.69609	2.22143	2.44e-05	0.000435684
ENSMUSG00000027180	Fbxo3	F-box protein 3	6.21697	8.0274	7.1451	7.6366	6.68104	7.832	1.15096	0.0200103	0.116002
ENSMUSG00000027189	Trim44	tripartite motif-containing 44	9.57619	11.7208	10.5844	11.6043	10.0803	11.6626	1.58224	0.000123151	0.00182191
ENSMUSG00000033059	Pygb	brain glycogen phosphorylase	7.02512	8.2162	6.88837	8.2153	6.95674	8.21575	1.25901	0.000385113	0.00473302
ENSMUSG00000108176	Gm43965	predicted gene, 43965	4.82696	5.94947	2.86651	5.60048	3.84674	5.77498	1.92824	0.0331053	0.168653
ENSMUSG00000047992	Fam69c	family with sequence similarity 69, member C	6.46966	8.9819	6.59161	9.10911	6.53064	9.04551	2.51487	1.9e-14	1.48e-12
ENSMUSG00000034336	Ina	internexin neuronal intermediate filament protein, alpha	8.53613	9.66378	8.0458	9.40377	8.29096	9.53378	1.24281	0.00015712	0.00223439
ENSMUSG00000034333	Zbed4	zinc finger, BED type containing 4	7.74543	9.50082	7.92024	9.48892	7.83283	9.49487	1.66204	3.26e-08	1.09e-06
ENSMUSG00000005893	Nr2c2	nuclear receptor subfamily 2, group C, member 2	7.94458	9.66378	8.62703	9.54812	8.2858	9.60595	1.32015	0.000301856	0.00385072
ENSMUSG00000038068	Rnf144b	ring finger protein 144B	9.12263	10.3364	8.49904	10.1765	8.81084	10.2565	1.44566	1.13e-05	0.000217864
ENSMUSG00000041037	Irgq	immunity-related GTPase family, Q	7.65424	8.83599	6.80962	8.88093	7.23193	8.85846	1.62653	3.83e-05	0.000649131
ENSMUSG00000078716	Tmem8b	transmembrane protein 8B	7.70055	9.49171	7.84326	9.11324	7.77191	9.30247	1.53057	1.78e-06	4.17e-05
ENSMUSG00000058297	Spock2	sparc/osteonectin, cwcv and kazal-like domains proteoglycan 2	8.78926	10.5908	7.95114	10.4078	8.3702	10.4993	2.12907	2.07e-09	8.37e-08
ENSMUSG00000058290	Espl1	extra spindle pole bodies 1, separase	7.75277	8.67364	7.63067	8.94724	7.69172	8.81044	1.11872	0.000670355	0.00760789
ENSMUSG00000044641	Pard6b	par-6 family cell polarity regulator beta	7.1857	8.81667	6.59161	8.68941	6.88865	8.75304	1.86438	3.05e-07	8.43e-06
ENSMUSG00000050737	Ptges	prostaglandin E synthase	3.28726	4.66215	2.86651	5.45178	3.07689	5.05696	1.98008	0.0165166	0.100673
ENSMUSG00000041966	Dcaf17	DDB1 and CUL4 associated factor 17	5.45014	6.93775	6.19711	6.80578	5.82362	6.87177	1.04814	0.0495743	0.225993
ENSMUSG00000047694	Yipf6	Yip1 domain family, member 6	5.52068	8.59075	7.17682	8.71139	6.34875	8.65107	2.30232	5.54e-05	0.00090576
ENSMUSG00000057963	Itpk1	inositol 1,3,4-triphosphate 5/6 kinase	7.52293	9.39406	6.91369	9.49843	7.21831	9.44625	2.22794	5.06e-11	2.56e-09
ENSMUSG00000103420	Gm37537	predicted gene, 37537	0	3.71803	0	2.52404	0	3.12104	3.12104	0.0357216	0.178341
ENSMUSG00000052609	Plekhg3	pleckstrin homology domain containing, family G (with RhoGef domain) member 3	6.60568	7.76042	6.17633	7.57801	6.39101	7.66922	1.27821	0.00189843	0.0180158
ENSMUSG00000054604	Cggbp1	CGG triplet repeat binding protein 1	7.64637	9.35105	8.94208	9.67094	8.29423	9.511	1.21677	0.0182097	0.108473
ENSMUSG00000051615	Rap2a	RAS related protein 2a	7.33996	8.95565	7.06826	8.80121	7.20411	8.87843	1.67432	3.51e-07	9.56e-06
ENSMUSG00000021910	Nisch	nischarin	9.84717	10.695	9.74289	11.0576	9.79503	10.8763	1.08127	0.000223314	0.00299085
ENSMUSG00000021913	Ogdhl	oxoglutarate dehydrogenase-like	6.15179	7.15334	5.23684	7.06667	5.69432	7.11	1.41569	0.00619185	0.0464489
ENSMUSG00000021918	Nek4	NIMA (never in mitosis gene a)-related expressed kinase 4	5.93647	7.65558	6.93857	7.70391	6.43752	7.67974	1.24222	0.0152885	0.0947465
ENSMUSG00000038533	Cbfa2t2	core-binding factor, runt domain, alpha subunit 2, translocated to, 2 (human)	7.23897	9.14572	8.30218	9.01948	7.77058	9.0826	1.31202	0.00412472	0.033692
ENSMUSG00000038534	Osbpl7	oxysterol binding protein-like 7	6.08353	6.61876	5.55914	7.06667	5.82133	6.84272	1.02138	0.0400421	0.194261
ENSMUSG00000030748	Il4ra	interleukin 4 receptor, alpha	6.01187	7.04127	5.62194	7.30208	5.81691	7.17167	1.35477	0.00282288	0.0248492
ENSMUSG00000063317	Usp31	ubiquitin specific peptidase 31	7.16382	10.0042	7.68315	9.9106	7.42349	9.95738	2.53389	6.85e-15	5.53e-13
ENSMUSG00000012076	Brms1l	breast cancer metastasis-suppressor 1-like	5.93647	7.2997	5.79544	6.63236	5.86595	6.96603	1.10008	0.0190439	0.112069
ENSMUSG00000028076	Cd1d1	CD1d1 antigen	6.83059	8.29511	7.21806	8.30474	7.02432	8.29993	1.2756	0.000614964	0.00706513
ENSMUSG00000020668	Kif3c	kinesin family member 3C	8.84186	10.6342	8.82685	10.3441	8.83436	10.4892	1.65481	5.26e-09	2e-07
ENSMUSG00000080968	Atf1-ps	activating transcription factor 1, pseudogene	2.69524	4.90105	3.06036	4.88321	2.8778	4.89213	2.01433	0.022353	0.126341
ENSMUSG00000026623	Lpgat1	lysophosphatidylglycerol acyltransferase 1	7.14161	8.89706	8.34934	9.12556	7.74547	9.01131	1.26584	0.0112159	0.074512
ENSMUSG00000034275	Igsf9b	immunoglobulin superfamily, member 9B	7.44345	9.61428	7.83666	9.47293	7.64005	9.54361	1.90355	3.15e-09	1.24e-07
ENSMUSG00000024565	Sall3	sal-like 3 (Drosophila)	5.62042	7.13785	5.68212	6.3814	5.65127	6.75962	1.10835	0.0241939	0.134638
ENSMUSG00000002881	Nab1	Ngfi-A binding protein 1	5.80132	7.38087	6.38987	7.55389	6.09559	7.46738	1.37179	0.00256151	0.0229113
ENSMUSG00000050505	Pcdh20	protocadherin 20	0	3.71803	0	3.93128	0	3.82466	3.82466	0.00427338	0.0346998
ENSMUSG00000020599	Rgs9	regulator of G-protein signaling 9	6.57286	8.86919	7.72666	8.65581	7.14976	8.7625	1.61274	0.000749259	0.00836511
ENSMUSG00000097845	A230020J21Rik	RIKEN cDNA A230020J21 gene	0	3.54096	0	3.93128	0	3.73612	3.73612	0.00596337	0.0451703
ENSMUSG00000020279	Il9r	interleukin 9 receptor	0	3.87572	0	2.52404	0	3.19988	3.19988	0.0268833	0.144705
ENSMUSG00000020277	Pfkl	phosphofructokinase, liver, B-type	7.40667	8.422	6.79607	8.42929	7.10137	8.42565	1.32428	0.000513964	0.00606597
ENSMUSG00000020271	Fbxw11	F-box and WD-40 domain protein 11	8.89262	9.44213	7.7689	9.53586	8.33076	9.489	1.15824	0.00963441	0.0663663
ENSMUSG00000033396	Spg11	SPG11, spatacsin vesicle trafficking associated	7.2179	8.74692	7.44342	8.26072	7.33066	8.50382	1.17316	0.00128553	0.0131051
ENSMUSG00000022814	Umps	uridine monophosphate synthetase	7.82424	8.28811	6.86259	8.4941	7.34342	8.39111	1.04769	0.0209739	0.120215
ENSMUSG00000037896	Rcor1	REST corepressor 1	6.37763	8.28108	6.76858	7.78903	6.5731	8.03505	1.46195	0.000310145	0.00394569
ENSMUSG00000062373	Tmem65	transmembrane protein 65	6.08353	7.87695	6.63793	8.2153	6.36073	8.04613	1.6854	5.18e-05	0.000853143
ENSMUSG00000020850	Prpf8	pre-mRNA processing factor 8	10.4224	11.5492	9.72334	11.5017	10.0729	11.5254	1.45256	1.48e-05	0.000278942
ENSMUSG00000031824	6430548M08Rik	RIKEN cDNA 6430548M08 gene	7.91869	9.19892	7.40822	8.96564	7.66345	9.08228	1.41883	3.52e-05	0.000602296
ENSMUSG00000031823	Zdhhc7	zinc finger, DHHC domain containing 7	7.9763	9.07429	6.92618	9.03698	7.45124	9.05564	1.6044	0.000164575	0.00232146
ENSMUSG00000026867	Gapvd1	GTPase activating protein and VPS9 domains 1	7.2179	9.02042	7.95724	9.03698	7.58757	9.0287	1.44113	0.000208432	0.00282405
ENSMUSG00000102697	Pcdhac2	protocadherin alpha subfamily C, 2	5.7435	7.54251	5.90049	6.82607	5.822	7.18429	1.36229	0.00322025	0.0276182
ENSMUSG00000045658	Pid1	phosphotyrosine interaction domain containing 1	4.44699	7.21367	5.35246	6.78521	4.89973	6.99944	2.09972	0.000123977	0.00183294
ENSMUSG00000042688	Mapk6	mitogen-activated protein kinase 6	8.63086	10.2794	9.19795	10.2097	8.9144	10.2445	1.33015	7.18e-05	0.00113854
ENSMUSG00000025986	Slc39a10	solute carrier family 39 (zinc transporter), member 10	7.20724	9.17257	8.58035	9.07562	7.8938	9.12409	1.23029	0.0235332	0.131589
ENSMUSG00000048458	Fam212b	family with sequence similarity 212, member B	7.85869	9.91157	7.87584	9.96877	7.86726	9.94017	2.07291	2.87e-13	1.95e-11
ENSMUSG00000024169	Ift140	intraflagellar transport 140	7.52293	8.55038	7.05694	8.35446	7.28993	8.45242	1.16249	0.00146622	0.0145469
ENSMUSG00000024294	Mib1	mindbomb E3 ubiquitin protein ligase 1	7.54848	10.9656	8.35397	10.007	7.95122	10.4863	2.53508	1.02e-09	4.32e-08
ENSMUSG00000040441	Slc26a10	solute carrier family 26, member 10	4.37266	5.71912	2.05189	5.5526	3.21228	5.63586	2.42358	0.0156112	0.0962864
ENSMUSG00000007659	Bcl2l1	BCL2-like 1	8.8759	9.74524	7.82336	9.51415	8.34963	9.62969	1.28006	0.00253807	0.0227714
ENSMUSG00000023068	Nus1	NUS1 dehydrodolichyl diphosphate synthase subunit	6.89839	9.29281	8.38599	9.4437	7.64219	9.36825	1.72607	0.00121339	0.0124787
ENSMUSG00000037703	Lzts3	leucine zipper, putative tumor suppressor family member 3	5.80132	6.57343	4.87374	6.94211	5.33753	6.75777	1.42025	0.0108426	0.072652
ENSMUSG00000024622	Hmgxb3	HMG box domain containing 3	7.15276	8.32277	6.51095	8.29022	6.83186	8.30649	1.47463	0.000165157	0.00232545
ENSMUSG00000036893	Ehmt1	euchromatic histone methyltransferase 1	8.53187	9.79546	8.5198	9.78153	8.52583	9.78849	1.26266	9.14e-06	0.000180764
ENSMUSG00000036894	Rap2b	RAP2B, member of RAS oncogene family	8.06748	9.05381	7.47778	8.86141	7.77263	8.95761	1.18498	0.000937326	0.010056
ENSMUSG00000022749	Tbc1d23	TBC1 domain family, member 23	4.51768	6.99044	6.57584	7.46615	5.54676	7.22829	1.68153	0.0378019	0.186021
ENSMUSG00000020451	Limk2	LIM motif-containing protein kinase 2	7.72316	8.75202	7.49466	8.56219	7.60891	8.6571	1.04819	0.0017688	0.0169928
ENSMUSG00000025218	Poll	polymerase (DNA directed), lambda	5.7727	6.97309	5.15427	6.96058	5.46348	6.96683	1.50335	0.00224586	0.0206416
ENSMUSG00000038936	Sccpdh	saccharopine dehydrogenase (putative)	5.03406	6.45346	4.87374	6.40855	4.9539	6.431	1.47711	0.00527263	0.0408935
ENSMUSG00000062944	9130023H24Rik	RIKEN cDNA 9130023H24 gene	5.41354	7.2997	4.70995	7.51694	5.06174	7.40832	2.34657	7.93e-07	2.01e-05
ENSMUSG00000027104	Atf2	activating transcription factor 2	7.79607	10.1171	8.85327	9.6932	8.32467	9.90513	1.58046	0.000292627	0.0037535
ENSMUSG00000033589	Reep4	receptor accessory protein 4	7.58185	7.83914	6.21758	8.24574	6.89972	8.04244	1.14272	0.0445267	0.209487
ENSMUSG00000031985	Gnpat	glyceronephosphate O-acyltransferase	8.24985	8.7055	7.59198	9.31686	7.92091	9.01118	1.09027	0.00522055	0.0405626
ENSMUSG00000005813	Metap1	methionyl aminopeptidase 1	5.98717	7.5888	6.91369	7.60173	6.45043	7.59527	1.14484	0.0235478	0.131639
ENSMUSG00000049600	Zbtb45	zinc finger and BTB domain containing 45	6.46966	7.61141	6.38987	7.76821	6.42976	7.68981	1.26005	0.00136407	0.0137675
ENSMUSG00000029231	Pdgfra	platelet derived growth factor receptor, alpha polypeptide	5.21512	6.93775	5.84892	6.4352	5.53202	6.68648	1.15446	0.0317512	0.163788
ENSMUSG00000028540	Dph2	DPH2 homolog	5.52068	6.76706	5.11114	6.23739	5.31591	6.50222	1.18631	0.0245167	0.135722
ENSMUSG00000034912	Mdga2	MAM domain containing glycosylphosphatidylinositol anchor 2	6.15179	7.76042	7.19759	8.00901	6.67469	7.88472	1.21003	0.0182884	0.108858
ENSMUSG00000044390	Tigd3	tigger transposable element derived 3	5.7137	6.08485	4.52516	7.0146	5.11943	6.54973	1.4303	0.0234231	0.131098
ENSMUSG00000036904	Fzd8	frizzled class receptor 8	4.77018	5.83889	4.76664	6.14353	4.76841	5.99121	1.2228	0.0375487	0.185205
ENSMUSG00000027665	Pik3ca	phosphatidylinositol-4,5-bisphosphate 3-kinase catalytic subunit alpha	6.37763	8.69496	7.96937	8.60976	7.1735	8.65236	1.47886	0.013882	0.0876825
ENSMUSG00000015659	Serac1	serine active site containing 1	4.02985	6.26672	5.4247	6.53715	4.72727	6.40194	1.67466	0.0167282	0.101566
ENSMUSG00000062040	Zfp27	zinc finger protein 27	5.85691	7.00758	5.92561	6.94211	5.89126	6.97485	1.08359	0.0171468	0.103418
ENSMUSG00000056536	Pign	phosphatidylinositol glycan anchor biosynthesis, class N	5.21512	7.39397	6.95086	7.80954	6.08299	7.60176	1.51877	0.029142	0.153536
ENSMUSG00000025006	Sorbs1	sorbin and SH3 domain containing 1	5.88392	7.13785	6.29671	7.10036	6.09031	7.11911	1.0288	0.0261784	0.141729
ENSMUSG00000018401	Mtmr4	myotubularin related protein 4	7.58185	9.05381	7.81666	8.94261	7.69926	8.99821	1.29895	6.08e-05	0.000979847
ENSMUSG00000071757	Zhx2	zinc fingers and homeoboxes 2	8.18617	9.26457	7.78271	9.43051	7.98444	9.34754	1.3631	2.08e-05	0.000378055
ENSMUSG00000005225	Plekha8	pleckstrin homology domain containing, family A (phosphoinositide binding specific) member 8	6.17385	8.49067	7.42593	8.14439	6.79989	8.31753	1.51764	0.00385433	0.0319189
ENSMUSG00000022843	Clcn2	chloride channel, voltage-sensitive 2	4.985	6.76706	5.52669	6.48708	5.25584	6.62707	1.37122	0.00990483	0.0679483
ENSMUSG00000022840	Adcy5	adenylate cyclase 5	6.83059	8.3962	6.54376	8.37526	6.68718	8.38573	1.69855	1.71e-06	4.03e-05
ENSMUSG00000021466	Ptch1	patched 1	9.34546	10.7457	9.32606	10.3318	9.33576	10.5387	1.20297	4.76e-05	0.000789927
ENSMUSG00000030465	Psd3	pleckstrin and Sec7 domain containing 3	5.58793	8.422	7.22818	8.30474	6.40806	8.36337	1.95531	0.000995389	0.010572
ENSMUSG00000027312	Atrn	attractin	7.41595	8.99486	7.6978	9.10911	7.55688	9.05198	1.4951	4.74e-06	0.000100366
ENSMUSG00000027314	Dll4	delta-like 4 (Drosophila)	7.50564	8.81179	6.99897	8.68387	7.2523	8.74783	1.49553	2.3e-05	0.000414433
ENSMUSG00000073643	Wdfy1	WD repeat and FYVE domain containing 1	6.60568	8.01049	7.38124	8.56822	6.99346	8.28936	1.2959	0.00360562	0.0302563
ENSMUSG00000028999	Rint1	RAD50 interactor 1	6.75944	7.81012	6.62266	7.6929	6.69105	7.75151	1.06046	0.00605068	0.0456244
ENSMUSG00000028991	Mtor	mechanistic target of rapamycin (serine/threonine kinase)	8.19698	9.66378	8.14535	9.56028	8.17116	9.61203	1.44087	6.82e-07	1.75e-05
ENSMUSG00000028995	Fam126a	family with sequence similarity 126, member A	6.88508	9.23939	8.16657	9.14184	7.52583	9.19062	1.66479	0.000682236	0.00772465
ENSMUSG00000047409	Ctdspl	CTD (carboxy-terminal domain, RNA polymerase II, polypeptide A) small phosphatase-like	5.96204	7.19882	5.99842	7.19698	5.98023	7.1979	1.21767	0.00501266	0.0393346
ENSMUSG00000033319	Fem1c	fem-1 homolog c (C.elegans)	6.12939	8.46608	7.58412	8.40253	6.85675	8.4343	1.57755	0.0051633	0.0402865
ENSMUSG00000038473	Nos1ap	nitric oxide synthase 1 (neuronal) adaptor protein	3.92972	5.80006	4.31317	5.45178	4.12144	5.62592	1.50448	0.0269972	0.145152
ENSMUSG00000022672	Prkdc	protein kinase, DNA activated, catalytic polypeptide	3.57933	6.17865	4.92445	6.63236	4.25189	6.40551	2.15362	0.0016199	0.0158029
ENSMUSG00000029591	Ung	uracil DNA glycosylase	7.68528	9.24302	7.42593	9.36618	7.5556	9.3046	1.74899	1.64e-08	5.81e-07
ENSMUSG00000036964	Trim17	tripartite motif-containing 17	3.28726	5.10595	2.37721	6.14353	2.83224	5.62474	2.7925	0.000348439	0.00435889
ENSMUSG00000042604	Kcna4	potassium voltage-gated channel, shaker-related subfamily, member 4	3.70582	5.67688	4.23497	6.46137	3.9704	6.06913	2.09873	0.00110958	0.0115742
ENSMUSG00000066687	Zbtb16	zinc finger and BTB domain containing 16	7.04918	8.89245	7.53601	8.65581	7.2926	8.77413	1.48154	4.67e-05	0.000776548
ENSMUSG00000020741	Cluh	clustered mitochondria (cluA/CLU1) homolog	7.39733	8.03578	6.98709	8.4359	7.19221	8.23584	1.04363	0.00625588	0.0468604
ENSMUSG00000020745	Pafah1b1	platelet-activating factor acetylhydrolase, isoform 1b, subunit 1	8.07922	9.77057	9.19795	9.6932	8.63858	9.73188	1.0933	0.0200607	0.116187
ENSMUSG00000028249	Sdcbp	syndecan binding protein	7.06106	8.91079	7.48624	8.87607	7.27365	8.89343	1.61978	3.01e-06	6.69e-05
ENSMUSG00000028246	Faxc	failed axon connections homolog	7.93169	9.70377	8.95128	9.65686	8.44149	9.68031	1.23883	0.00450718	0.0362153
ENSMUSG00000028243	Ubxn2b	UBX domain protein 2B	5.37598	7.61141	6.60722	7.77866	5.9916	7.69503	1.70343	0.0017849	0.0171061
ENSMUSG00000013465	Nelfb	negative elongation factor complex member B	7.04918	8.28108	6.4078	8.27554	6.72849	8.27831	1.54982	8.01e-05	0.00124871
ENSMUSG00000044528	Tram1l1	translocation associated membrane protein 1-like 1	6.46966	6.55022	4.87374	7.49176	5.6717	7.02099	1.3493	0.047883	0.220609
ENSMUSG00000108391	Gm9768	predicted gene 9768	0	3.10428	0	3.15702	0	3.13065	3.13065	0.0435571	0.205935
ENSMUSG00000027298	Tyro3	TYRO3 protein tyrosine kinase 3	6.06003	7.5307	5.4247	7.35886	5.74237	7.44478	1.70241	0.00017251	0.00241876
ENSMUSG00000060935	Tmem263	transmembrane protein 263	6.08353	8.43473	7.69049	8.26072	6.88701	8.34772	1.46071	0.0185805	0.110176
ENSMUSG00000003810	Mast2	microtubule associated serine/threonine kinase 2	9.31354	10.1789	8.77598	9.98915	9.04476	10.084	1.03927	0.00143479	0.0142958
ENSMUSG00000029922	Mkrn1	makorin, ring finger protein, 1	8.4973	9.76049	7.91398	9.40714	8.20564	9.58382	1.37818	6.05e-05	0.000975974
ENSMUSG00000035653	Lrfn5	leucine rich repeat and fibronectin type III domain containing 5	5.0815	6.55022	5.11114	7.28752	5.09632	6.91887	1.82255	0.000274398	0.00355879
ENSMUSG00000083558	Gm12896	predicted gene 12896	1.06717	3.71803	0	3.39284	0.533587	3.55544	3.02185	0.0360847	0.179386
ENSMUSG00000031901	Dus2	dihydrouridine synthase 2	4.985	6.37637	4.58942	5.77755	4.78721	6.07696	1.28975	0.0283373	0.15063
ENSMUSG00000049680	Urgcp	upregulator of cell proliferation	6.27933	8.73668	5.92561	8.46853	6.10247	8.6026	2.50013	6.63e-12	3.78e-10
ENSMUSG00000026944	Abca2	ATP-binding cassette, sub-family A (ABC1), member 2	7.85869	8.93787	7.22818	8.84162	7.54343	8.88975	1.34631	0.000207753	0.00281813
ENSMUSG00000070923	Klhl9	kelch-like 9	7.41595	9.71946	8.16129	9.64263	7.78862	9.68105	1.89242	2.4e-07	6.74e-06
ENSMUSG00000028893	Sesn2	sestrin 2	3.57933	5.67688	2.05189	5.5526	2.81561	5.61474	2.79913	0.000895497	0.00970087
ENSMUSG00000048550	Thnsl1	threonine synthase-like 1 (bacterial)	3.92972	6.47826	3.23123	5.81862	3.58047	6.14844	2.56797	8.64e-05	0.00133329
ENSMUSG00000029414	Kntc1	kinetochore associated 1	4.985	7.92285	7.09063	8.2076	6.03782	8.06522	2.0274	0.00571904	0.0437025
ENSMUSG00000032667	Pon2	paraoxonase 2	7.86548	9.90701	7.90769	9.92242	7.88659	9.91472	2.02813	9.8e-13	6.2e-11
ENSMUSG00000029413	Naaa	N-acylethanolamine acid amidase	5.33741	7.47015	5.65235	6.92341	5.49488	7.19678	1.7019	0.000286759	0.00369447
ENSMUSG00000034993	Vat1	vesicle amine transport 1	7.25974	7.90466	6.54376	8.16842	6.90175	8.03654	1.13479	0.00757201	0.0547271
ENSMUSG00000021621	Zcchc9	zinc finger, CCHC domain containing 9	6.68461	9.04138	7.68315	8.9192	7.18388	8.98029	1.79641	3.36e-05	0.000577546
ENSMUSG00000032590	Apeh	acylpeptide hydrolase	6.23806	7.34086	6.15526	7.19698	6.19666	7.26892	1.07226	0.0117536	0.0771839
ENSMUSG00000024978	Gpam	glycerol-3-phosphate acyltransferase, mitochondrial	6.46966	8.23087	6.51095	8.10343	6.49031	8.16715	1.67685	4.26e-06	9.14e-05
ENSMUSG00000001985	Grik3	glutamate receptor, ionotropic, kainate 3	8.38833	10.4877	8.14535	10.5623	8.26684	10.525	2.25816	5.87e-16	5.15e-14
ENSMUSG00000043831	Lysmd4	LysM, putative peptidoglycan-binding, domain containing 4	5.96204	7.2997	6.71197	7.55389	6.33701	7.42679	1.08979	0.0253127	0.138552
ENSMUSG00000040560	Wdr7	WD repeat domain 7	6.06003	8.41559	6.54376	8.44904	6.3019	8.43232	2.13042	2.12e-08	7.36e-07
ENSMUSG00000037646	Vps13b	vacuolar protein sorting 13B	6.33911	8.60771	8.06852	8.74373	7.20382	8.67572	1.47191	0.0223172	0.126302
ENSMUSG00000047030	Spata2	spermatogenesis associated 2	7.66206	8.70024	7.34447	8.51299	7.50327	8.60662	1.10335	0.00131774	0.0133925
ENSMUSG00000008730	Hipk1	homeodomain interacting protein kinase 1	8.67792	10.5028	9.29026	10.4295	8.98409	10.4662	1.48207	1.18e-05	0.00022748
ENSMUSG00000031561	Tenm3	teneurin transmembrane protein 3	8.20771	10.2181	8.74104	9.95502	8.47438	10.0866	1.61218	1.36e-06	3.27e-05
ENSMUSG00000032375	Aph1b	aph1 homolog B, gamma secretase subunit	5.29779	7.22837	6.06773	7.0146	5.68276	7.12149	1.43872	0.00470467	0.0374374
ENSMUSG00000018481	Appbp2	amyloid beta precursor protein (cytoplasmic tail) binding protein 2	7.4525	9.38425	8.96043	9.65969	8.20646	9.52197	1.3155	0.0203937	0.117524
ENSMUSG00000037474	Dtl	denticleless E3 ubiquitin protein ligase	6.92464	8.36993	7.77582	8.8266	7.35023	8.59826	1.24803	0.00468078	0.0373199
ENSMUSG00000037470	Uggt1	UDP-glucose glycoprotein glucosyltransferase 1	7.37846	8.66286	7.66835	8.63297	7.5234	8.64791	1.12451	0.001085	0.0113839
ENSMUSG00000027933	Ints3	integrator complex subunit 3	7.62251	8.68966	7.38124	8.51923	7.50188	8.60445	1.10257	0.00110283	0.0115102
ENSMUSG00000023036	Pcdhgc4	protocadherin gamma subfamily C, 4	5.33741	7.32727	4.4579	6.8658	4.89766	7.09653	2.19887	2.92e-05	0.000511596
ENSMUSG00000031732	Phlpp2	PH domain and leucine rich repeat protein phosphatase 2	6.57286	7.75028	6.62266	7.62507	6.59776	7.68767	1.08992	0.00538596	0.0415379
ENSMUSG00000032624	Eml4	echinoderm microtubule associated protein like 4	6.08353	8.08506	7.22818	7.80954	6.65586	7.9473	1.29145	0.0144809	0.0908267
ENSMUSG00000079562	Maea	macrophage erythroblast attacher	8.25503	9.70902	7.63829	9.48255	7.94666	9.59579	1.64913	1.21e-06	2.93e-05
ENSMUSG00000039913	Pak7	p21 protein (Cdc42/Rac)-activated kinase 7	4.88159	7.16866	5.23684	6.60914	5.05921	6.8889	1.82969	0.000298275	0.00381317
ENSMUSG00000027584	Oprl1	opioid receptor-like 1	4.64945	5.39363	3.06036	5.73528	3.85491	5.56446	1.70955	0.0471829	0.218419
ENSMUSG00000027582	Zgpat	zinc finger, CCCH-type with G patch domain	6.85809	8.3364	6.54376	7.19698	6.70093	7.76669	1.06576	0.0155076	0.0957414
ENSMUSG00000053617	Sh3pxd2a	SH3 and PX domains 2A	7.74543	8.84078	7.07949	8.51299	7.41246	8.67689	1.26443	0.00101232	0.0107275
ENSMUSG00000017667	Zfp334	zinc finger protein 334	7.00065	8.36328	7.34447	8.46853	7.17256	8.41591	1.24334	0.000603179	0.006964
ENSMUSG00000051920	Rspo2	R-spondin 2	4.71108	6.6842	5.02081	5.77755	4.86594	6.23087	1.36493	0.017325	0.104187
ENSMUSG00000031530	Dusp4	dual specificity phosphatase 4	7.70813	8.66826	7.48624	8.6671	7.59719	8.66768	1.07049	0.00122983	0.0126144
ENSMUSG00000085113	B130011K05Rik	RIKEN cDNA B130011K05 gene	0	2.47503	0	3.59548	0	3.03526	3.03526	0.0456087	0.212989
ENSMUSG00000022186	Oxct1	3-oxoacid CoA transferase 1	7.9763	9.35105	8.78287	9.4172	8.37958	9.38413	1.00454	0.01318	0.0843902
ENSMUSG00000103928	Gm37893	predicted gene, 37893	2.09962	4.57283	1.63118	3.77313	1.8654	4.17298	2.30758	0.0360726	0.179386
ENSMUSG00000022961	Son	Son DNA binding protein	9.11979	10.959	9.7898	10.9485	9.4548	10.9538	1.49895	1.46e-05	0.000275285
ENSMUSG00000059921	Unc5c	unc-5 netrin receptor C	5.91043	7.92285	7.19759	8.06981	6.55401	7.99633	1.44232	0.00886524	0.0620939
ENSMUSG00000043439	Epop	elongin BC and polycomb repressive complex 2 associated protein	5.5547	6.23796	5.27642	7.27282	5.41556	6.75539	1.33983	0.00924254	0.0642164
ENSMUSG00000042523	Dnal1	dynein, axonemal, light chain 1	5.7435	7.25733	6.44301	7.19698	6.09326	7.22715	1.13389	0.0209061	0.119885
ENSMUSG00000035776	Cd99l2	CD99 antigen-like 2	7.41595	8.74181	7.42593	8.58021	7.42094	8.66101	1.24007	0.000172652	0.00241931
ENSMUSG00000040270	Bach2	BTB and CNC homology, basic leucine zipper transcription factor 2	7.78178	9.11836	8.09089	8.92391	7.93634	9.02113	1.0848	0.00113028	0.0117692
ENSMUSG00000024120	Lrpprc	leucine-rich PPR-motif containing	4.82696	8.23815	6.3347	8.26815	5.58083	8.25315	2.67232	9.43e-07	2.34e-05
ENSMUSG00000024268	Celf4	CUGBP, Elav-like family member 4	7.76008	9.84875	9.00234	9.74472	8.38121	9.79673	1.41552	0.00317143	0.0273281
ENSMUSG00000059495	Arhgef12	Rho guanine nucleotide exchange factor (GEF) 12	8.46188	10.1032	9.33546	10.2213	8.89867	10.1622	1.26355	0.00146372	0.0145344
ENSMUSG00000056679	Gpr173	G-protein coupled receptor 173	6.96315	8.85978	6.51095	8.8165	6.73705	8.83814	2.10109	1.25e-09	5.21e-08
ENSMUSG00000059149	Mfsd4a	major facilitator superfamily domain containing 4A	5.7137	7.48246	6.87554	7.44006	6.29462	7.46126	1.16664	0.0405251	0.19579
ENSMUSG00000059146	Ntrk3	neurotrophic tyrosine kinase, receptor, type 3	5.25705	6.90153	5.49348	6.40855	5.37527	6.65504	1.27977	0.0115433	0.0761362
ENSMUSG00000051375	Pcdh1	protocadherin 1	7.02512	7.72976	6.11216	7.87914	6.56864	7.80445	1.23581	0.0083317	0.0591017
ENSMUSG00000094388	Gm8783	predicted pseudogene 8783	3.57933	5.8767	4.52516	6.07739	4.05224	5.97705	1.9248	0.00497906	0.03915
ENSMUSG00000057230	Aak1	AP2 associated kinase 1	7.57358	9.05381	8.62703	9.64549	8.1003	9.34965	1.24935	0.00708124	0.0520175
ENSMUSG00000046897	Zfp740	zinc finger protein 740	8.80701	10.0254	8.70524	10.0827	8.75612	10.054	1.29792	3.59e-06	7.83e-05
ENSMUSG00000066735	Vkorc1l1	vitamin K epoxide reductase complex, subunit 1-like 1	8.61885	9.8535	8.87276	9.73134	8.74581	9.79242	1.04661	0.000564451	0.00657279
ENSMUSG00000042581	Thsd7b	thrombospondin, type I, domain containing 7B	2.69524	5.67688	3.97119	5.60048	3.33321	5.63868	2.30547	0.00414258	0.0338023
ENSMUSG00000036062	Phf24	PHD finger protein 24	6.33911	7.43256	6.49427	7.44006	6.41669	7.43631	1.01962	0.0127032	0.0820351
ENSMUSG00000061175	Fnip2	folliculin interacting protein 2	6.21697	7.85817	6.11216	7.88882	6.16457	7.87349	1.70893	9.23e-06	0.000182048
ENSMUSG00000107222	Gm43198	predicted gene 43198	0	2.47503	0	3.59548	0	3.03526	3.03526	0.0456087	0.212989
ENSMUSG00000025821	Zfp282	zinc finger protein 282	7.48814	8.59075	7.05694	8.31912	7.27254	8.45494	1.1824	0.00117105	0.0121503
ENSMUSG00000042724	Map3k9	mitogen-activated protein kinase kinase kinase 9	7.37846	8.25977	7.01075	8.35446	7.1946	8.30712	1.11251	0.0021198	0.0196767
ENSMUSG00000035576	L3mbtl1	l(3)mbt-like (Drosophila)	1.67385	4.66215	0	2.52404	0.836925	3.59309	2.75617	0.0376565	0.185619
ENSMUSG00000035575	Utp6	UTP6 small subunit processome component	6.21697	7.96734	7.12356	7.49176	6.67027	7.72955	1.05928	0.034899	0.175189
ENSMUSG00000042097	Zfp239	zinc finger protein 239	4.29429	5.63337	3.87133	5.50307	4.08281	5.56822	1.48541	0.0308706	0.160364
ENSMUSG00000028364	Tnc	tenascin C	6.01187	7.79045	5.62194	7.44006	5.81691	7.61526	1.79835	2.42e-05	0.000433938
ENSMUSG00000053414	Hunk	hormonally upregulated Neu-associated kinase	9.15071	10.0317	8.6648	10.0003	8.90775	10.016	1.10825	0.000425926	0.00517878
ENSMUSG00000016028	Celsr1	cadherin, EGF LAG seven-pass G-type receptor 1	6.17385	7.15334	5.4595	7.38644	5.81667	7.26989	1.45322	0.00229428	0.0209983
ENSMUSG00000037134	Prmt9	protein arginine methyltransferase 9	4.985	7.56584	5.95029	7.31648	5.46764	7.44116	1.97352	0.000113311	0.0016935
ENSMUSG00000004558	Ndrg2	N-myc downstream regulated gene 2	7.13038	8.23087	6.44301	8.44249	6.78669	8.33668	1.54998	0.000103818	0.00156363
ENSMUSG00000034300	Fam53c	family with sequence similarity 53, member C	8.58221	10.9301	7.93268	10.9635	8.25745	10.9468	2.68932	2.58e-17	2.53e-15
ENSMUSG00000015522	Arnt	aryl hydrocarbon receptor nuclear translocator	7.57358	9.19519	7.24823	8.98832	7.4109	9.09175	1.68085	2.23e-07	6.31e-06
ENSMUSG00000041390	Mdfic	MyoD family inhibitor domain containing	4.77018	6.34973	4.58942	6.14353	4.6798	6.24663	1.56683	0.00525189	0.0407733
ENSMUSG00000061751	Kalrn	kalirin, RhoGEF kinase	7.69294	8.90165	8.07975	8.90497	7.88634	8.90331	1.01696	0.00316801	0.0273208
ENSMUSG00000021901	Bap1	Brca1 associated protein 1	9.7912	10.3108	8.49065	10.3193	9.14092	10.315	1.17412	0.0148812	0.0927396
ENSMUSG00000061759	Armt1	acidic residue methyltransferase 1	6.3585	8.26691	6.29671	7.79932	6.3276	8.03312	1.70551	1.15e-05	0.000221262
ENSMUSG00000000317	Bcl6b	B cell CLL/lymphoma 6, member B	0	4.57283	0	4.4324	0	4.50262	4.50262	0.000139224	0.00202073
ENSMUSG00000018379	Srsf1	serine/arginine-rich splicing factor 1	8.42558	9.04553	8.94822	10.4145	8.6869	9.73	1.0431	0.0120654	0.0788984
ENSMUSG00000054676	1600014C10Rik	RIKEN cDNA 1600014C10 gene	6.25885	7.22837	5.23684	7.18132	5.74784	7.20484	1.457	0.00565177	0.0432876
ENSMUSG00000109852	Gm45360	predicted gene 45360	0	3.33908	0	3.39284	0	3.36596	3.36596	0.0223522	0.126341
ENSMUSG00000055980	Irs1	insulin receptor substrate 1	8.01957	10.2436	8.84671	10.2441	8.43314	10.2438	1.81071	1.21e-06	2.93e-05
ENSMUSG00000036564	Ndrg4	N-myc downstream regulated gene 4	7.52293	9.12623	7.63067	9.20128	7.5768	9.16375	1.58695	3.09e-07	8.51e-06
ENSMUSG00000047842	Diras2	DIRAS family, GTP-binding RAS-like 2	7.98256	10.121	8.13462	10.1785	8.05859	10.1498	2.09117	2e-13	1.39e-11
ENSMUSG00000062098	Btbd3	BTB (POZ) domain containing 3	5.88392	7.57737	6.59161	7.16549	6.23777	7.37143	1.13366	0.0196199	0.114631
ENSMUSG00000025612	Bach1	BTB and CNC homology 1, basic leucine zipper transcription factor 1	6.84441	8.85506	7.77582	8.66147	7.31011	8.75826	1.44815	0.000906257	0.00979018
ENSMUSG00000034893	Cog3	component of oligomeric golgi complex 3	5.41354	7.81986	6.87554	7.97308	6.14454	7.89647	1.75193	0.0027002	0.0239591
ENSMUSG00000103897	Pcdhga8	protocadherin gamma subfamily A, 8	2.69524	4.90105	2.05189	5.28597	2.37357	5.09351	2.71994	0.00207943	0.01941
ENSMUSG00000024052	Lpin2	lipin 2	7.34968	8.38968	6.99897	8.22297	7.17433	8.30632	1.132	0.00174739	0.0168218
ENSMUSG00000039840	Epg5	ectopic P-granules autophagy protein 5 homolog (C. elegans)	5.93647	8.20881	6.4078	7.80954	6.17214	8.00918	1.83704	8.83e-06	0.000175121
ENSMUSG00000026360	Rgs2	regulator of G-protein signaling 2	7.57358	9.11441	7.89504	9.09664	7.73431	9.10552	1.37122	2.68e-05	0.000472155
ENSMUSG00000097578	Gm26798	predicted gene, 26798	6.19557	7.35432	5.4247	6.88526	5.81013	7.11979	1.30965	0.00904638	0.0631542
ENSMUSG00000022106	Rcbtb2	regulator of chromosome condensation (RCC1) and BTB (POZ) domain containing protein 2	7.02512	8.53863	7.27778	8.56219	7.15145	8.55041	1.39896	5.36e-05	0.0008803
ENSMUSG00000011752	Pgam1	phosphoglycerate mutase 1	9.51271	10.258	8.0458	10.5714	8.77925	10.4147	1.63546	0.0010407	0.0109933
ENSMUSG00000017978	Cadps2	Ca2+-dependent activator protein for secretion 2	3.44067	5.5422	4.52516	5.89741	3.98292	5.7198	1.73689	0.0204521	0.117774
ENSMUSG00000039976	Tbc1d16	TBC1 domain family, member 16	8.76767	9.66648	8.42172	9.92478	8.5947	9.79563	1.20093	0.000100802	0.00152907
ENSMUSG00000026163	Sphkap	SPHK1 interactor, AKAP domain containing	5.21512	7.36766	6.54376	7.14948	5.87944	7.25857	1.37913	0.0245402	0.13581
ENSMUSG00000104936	2610011E03Rik	RIKEN cDNA 2610011E03 gene	0	2.47503	0	3.77313	0	3.12408	3.12408	0.0338025	0.171027
ENSMUSG00000023027	Atf1	activating transcription factor 1	7.1857	9.72983	8.01102	9.29884	7.59836	9.51433	1.91597	1.26e-06	3.03e-05
ENSMUSG00000014245	Pigl	phosphatidylinositol glycan anchor biosynthesis, class L	6.06003	7.47015	5.90049	7.72566	5.98026	7.59791	1.61764	8.41e-05	0.00130274
ENSMUSG00000011256	Adam19	a disintegrin and metallopeptidase domain 19 (meltrin beta)	7.40667	8.81667	6.79607	8.92861	7.10137	8.87264	1.77127	8.99e-07	2.24e-05
ENSMUSG00000028476	Reck	reversion-inducing-cysteine-rich protein with kazal motifs	6.27933	7.70895	6.71197	7.40004	6.49565	7.55449	1.05884	0.0143386	0.090031
ENSMUSG00000042303	Sgsm3	small G protein signaling modulator 3	5.25705	6.78706	5.19615	6.67771	5.2266	6.73238	1.50579	0.00213321	0.0197775
ENSMUSG00000043940	Wdfy3	WD repeat and FYVE domain containing 3	9.17004	10.6602	9.40407	10.6432	9.28705	10.6517	1.36462	1.73e-06	4.06e-05
ENSMUSG00000026443	Lrrn2	leucine rich repeat protein 2, neuronal	7.51431	8.27401	6.27733	8.11172	6.89582	8.19286	1.29705	0.0115398	0.0761362
ENSMUSG00000089704	Galnt2	UDP-N-acetyl-alpha-D-galactosamine:polypeptide N-acetylgalactosaminyltransferase 2	9.13393	9.82477	8.35859	9.75533	8.74626	9.79005	1.04379	0.00472884	0.0376132
ENSMUSG00000050271	Prag1	PEAK1 related kinase activating pseudokinase 1	6.03615	6.84543	4.31317	6.88526	5.17466	6.86534	1.69068	0.0165714	0.100876
ENSMUSG00000038368	Focad	focadhesin	4.12349	6.52663	4.76664	6.00807	4.44506	6.26735	1.82229	0.0025747	0.022994
ENSMUSG00000025178	Pi4k2a	phosphatidylinositol 4-kinase type 2 alpha	7.09614	8.14051	6.78239	8.38212	6.93926	8.26132	1.32206	0.000301401	0.00384702
ENSMUSG00000019990	Pde7b	phosphodiesterase 7B	3.28726	6.52663	4.65094	5.50307	3.9691	6.01485	2.04575	0.00614236	0.0461666
ENSMUSG00000026280	Atg4b	autophagy related 4B, cysteine peptidase	7.33996	8.1864	7.23824	8.40926	7.2891	8.29783	1.00873	0.00420729	0.0342367
ENSMUSG00000104214	Gm36638	predicted gene, 36638	2.09962	4.26598	2.05189	4.4324	2.07576	4.34919	2.27343	0.0307092	0.159632
ENSMUSG00000073485	H3f3aos	H3 histone, family 3A, opposite strand	4.93422	5.22799	4.76664	7.16549	4.85043	6.19674	1.34631	0.0178371	0.106935
ENSMUSG00000103793	Pcdhga6	protocadherin gamma subfamily A, 6	3.11558	7.19882	4.23497	6.48708	3.67527	6.84295	3.16768	2.93e-07	8.11e-06
ENSMUSG00000029265	Dr1	down-regulator of transcription 1	6.72998	8.29511	6.91369	8.30474	6.82183	8.29993	1.47809	3.48e-05	0.000596837
ENSMUSG00000075415	Fnbp1	formin binding protein 1	8.47082	9.45469	8.40843	9.63977	8.43962	9.54723	1.10761	0.00018705	0.00258997
ENSMUSG00000070425	Xntrpc	Xndc1-transient receptor potential cation channel, subfamily C, member 2 readthrough	4.37266	5.8767	4.15229	5.5526	4.26248	5.71465	1.45217	0.0252312	0.138268
ENSMUSG00000040596	Pogk	pogo transposable element with KRAB domain	8.41636	10.6176	9.46743	10.4508	8.94189	10.5342	1.59231	0.000161999	0.00229562
ENSMUSG00000014177	Tvp23b	trans-golgi network vesicle protein 23B	5.21512	6.90153	5.15427	7.40004	5.1847	7.15078	1.96609	2.92e-05	0.000511596
ENSMUSG00000063362	Alg11	asparagine-linked glycosylation 11 (alpha-1,2-mannosyltransferase)	6.60568	7.68784	5.95029	7.61345	6.27798	7.65064	1.37266	0.00164196	0.0159748
ENSMUSG00000049323	Smcr8	Smith-Magenis syndrome chromosome region, candidate 8 homolog (human)	7.82424	9.22847	8.26331	9.232	8.04377	9.23024	1.18646	0.000436504	0.00528811
ENSMUSG00000021275	Tecpr2	tectonin beta-propeller repeat containing 2	6.48738	7.97607	6.4603	7.57801	6.47384	7.77704	1.3032	0.00097996	0.0104319
ENSMUSG00000021271	Zfp839	zinc finger protein 839	6.15179	7.74006	6.21758	7.44006	6.18469	7.59006	1.40537	0.000579133	0.00671628
ENSMUSG00000022565	Plec	plectin	8.32569	9.06613	7.51961	9.22056	7.92265	9.14335	1.2207	0.00157979	0.0154959
ENSMUSG00000028005	Gucy1b3	guanylate cyclase 1, soluble, beta 3	5.29779	6.93775	5.19615	6.56155	5.24697	6.74965	1.50268	0.00229457	0.0209983
ENSMUSG00000039191	Rbpj	recombination signal binding protein for immunoglobulin kappa J region	8.54038	9.92517	9.1902	9.92947	8.86529	9.92732	1.06203	0.00317884	0.0273622
ENSMUSG00000052373	Mpp3	membrane protein, palmitoylated 3 (MAGUK p55 subfamily member 3)	6.63777	7.35432	5.97455	7.33075	6.30616	7.34253	1.03637	0.025252	0.138317
ENSMUSG00000030451	Herc2	HECT and RLD domain containing E3 ubiquitin protein ligase 2	7.72316	9.88166	8.7375	9.71511	8.23033	9.79839	1.56806	0.000201312	0.00274671
ENSMUSG00000040865	Ino80d	INO80 complex subunit D	8.03772	9.78555	9.20565	9.73938	8.62169	9.76247	1.14078	0.0172562	0.103826
ENSMUSG00000040860	Crocc	ciliary rootlet coiled-coil, rootletin	7.77459	9.22114	7.85638	9.19349	7.81548	9.20731	1.39183	5.14e-06	0.000107819
ENSMUSG00000026097	Ormdl1	ORM1-like 1 (S. cerevisiae)	7.14161	8.49675	7.63829	8.34043	7.38995	8.41859	1.02864	0.00728273	0.0531132
ENSMUSG00000017119	Nbr1	neighbor of Brca1 gene 1	8.519	10.1249	9.28056	9.74738	8.89978	9.93616	1.03638	0.0082016	0.0583739
ENSMUSG00000035172	Plekhh3	pleckstrin homology domain containing, family H (with MyTH4 domain) member 3	4.29429	6.32259	4.70995	6.48708	4.50212	6.40483	1.90271	0.000753344	0.00839867
ENSMUSG00000059811	Atl2	atlastin GTPase 2	6.45171	8.08506	7.51961	8.17634	6.98566	8.1307	1.14504	0.0237623	0.132709
ENSMUSG00000024742	Fen1	flap structure specific endonuclease 1	6.58936	8.28108	7.32573	8.00011	6.95755	8.1406	1.18305	0.00673138	0.0498238
ENSMUSG00000055254	Ntrk2	neurotrophic tyrosine kinase, receptor, type 2	5.0815	6.50265	5.97455	7.04952	5.52803	6.77608	1.24806	0.0284629	0.151118
ENSMUSG00000000184	Ccnd2	cyclin D2	4.88159	6.52663	5.52669	6.29673	5.20414	6.41168	1.20754	0.0336853	0.17067
ENSMUSG00000084883	Ccdc85c	coiled-coil domain containing 85C	11.23	11.9347	10.5333	12.0975	10.8816	12.0161	1.13446	0.00103126	0.0109034
ENSMUSG00000082016	Pgam1-ps2	phosphoglycerate mutase 1, pseudogene 2	7.67758	8.52679	6.23777	8.66147	6.95768	8.59413	1.63645	0.00193286	0.0182979
ENSMUSG00000050556	Kcnb1	potassium voltage gated channel, Shab-related subfamily, member 1	6.17385	7.95855	7.38124	8.58021	6.77755	8.26938	1.49183	0.00459864	0.0368285
ENSMUSG00000055782	Abcd2	ATP-binding cassette, sub-family D (ALD), member 2	5.29779	7.31355	6.4603	7.44006	5.87905	7.37681	1.49776	0.00734522	0.053452
ENSMUSG00000021840	Mapk1ip1l	mitogen-activated protein kinase 1 interacting protein 1-like	9.63103	11.1399	9.46743	11.1769	9.54923	11.1584	1.60919	2.37e-09	9.5e-08
ENSMUSG00000027878	Notch2	notch 2	7.89233	9.48561	7.56026	9.44698	7.7263	9.46629	1.73999	1.41e-08	5.06e-07
ENSMUSG00000031258	Xkrx	X-linked Kx blood group related, X-linked	0	3.10428	0	3.15702	0	3.13065	3.13065	0.0435571	0.205935
ENSMUSG00000090561	Gm17207	predicted gene 17207	0	3.10428	0	3.15702	0	3.13065	3.13065	0.0435571	0.205935
ENSMUSG00000049396	Gemin4	gem nuclear organelle associated protein 4	6.50488	7.25733	6.045	7.47901	6.27494	7.36817	1.09323	0.0127184	0.0821105
ENSMUSG00000035403	Crb2	crumbs family member 2	6.95042	8.14826	6.668	8.5378	6.80921	8.34303	1.53382	3.24e-05	0.000558817
ENSMUSG00000032437	Stt3b	STT3, subunit of the oligosaccharyltransferase complex, homolog B (S. cerevisiae)	8.38361	9.39406	8.30218	9.36271	8.3429	9.37838	1.03549	0.000489964	0.00582987
ENSMUSG00000006932	Ctnnb1	catenin (cadherin associated protein), beta 1	10.4599	12.1047	10.3071	12.0362	10.3835	12.0704	1.68691	2.92e-10	1.32e-08
ENSMUSG00000033960	Jcad	junctional cadherin 5 associated	7.10764	8.71074	6.86259	8.78576	6.98512	8.74825	1.76314	1.24e-07	3.69e-06
ENSMUSG00000004798	Ulk2	unc-51 like kinase 2	7.47043	9.80529	8.63085	9.92242	8.05064	9.86386	1.81322	4.55e-05	0.000758774
ENSMUSG00000027177	Hipk3	homeodomain interacting protein kinase 3	6.84441	9.36109	8.23346	9.232	7.53893	9.29655	1.75762	0.000555365	0.00648899
ENSMUSG00000034412	Tbc1d10a	TBC1 domain family, member 10a	5.17194	6.29493	5.27642	6.53715	5.22418	6.41604	1.19186	0.0231749	0.12999
ENSMUSG00000001687	Ubl3	ubiquitin-like 3	6.68461	8.23087	7.21806	7.6929	6.95133	7.96189	1.01055	0.0179707	0.107532
ENSMUSG00000022263	Trio	triple functional domain (PTPRF interacting)	8.13087	9.53077	8.33535	9.23958	8.23311	9.38518	1.15207	0.000260493	0.00340303
ENSMUSG00000087968	Gm25395	predicted gene, 25395	7.20724	9.04968	6.86259	9.51415	7.03492	9.28191	2.24699	4.82e-11	2.47e-09
ENSMUSG00000014426	Map3k4	mitogen-activated protein kinase kinase kinase 4	7.85869	8.68966	7.27778	8.55613	7.56823	8.62289	1.05466	0.00451122	0.0362278
ENSMUSG00000023953	Polh	polymerase (DNA directed), eta (RAD 30 related)	5.5547	6.93775	6.09012	7.08361	5.82241	7.01068	1.18828	0.0147816	0.0923148
ENSMUSG00000023951	Vegfa	vascular endothelial growth factor A	7.70813	8.67364	7.72666	8.84659	7.7174	8.76011	1.04272	0.00139094	0.0139602
ENSMUSG00000066415	Msl2	male-specific lethal 2 homolog (Drosophila)	7.53149	9.58317	8.77943	9.50788	8.15546	9.54553	1.39006	0.00428138	0.0347406
ENSMUSG00000036766	Dner	delta/notch-like EGF repeat containing	6.91157	7.4452	6.42552	8.06128	6.66855	7.75324	1.08469	0.0113824	0.0753713
ENSMUSG00000036764	Dnajc12	DnaJ heat shock protein family (Hsp40) member C12	5.48584	7.15334	3.38398	7.25797	4.43491	7.20565	2.77074	9.88e-05	0.00150406
ENSMUSG00000020986	Sec23a	SEC23 homolog A, COPII coat complex component	6.81664	9.1223	7.56826	8.93329	7.19245	9.02779	1.83535	2.35e-06	5.36e-05
ENSMUSG00000020988	L2hgdh	L-2-hydroxyglutarate dehydrogenase	5.21512	6.80678	4.4579	7.0146	4.83651	6.91069	2.07418	7.69e-05	0.00120685
ENSMUSG00000030089	Slc41a3	solute carrier family 41, member 3	0	4.97263	3.38398	5.69173	1.69199	5.33218	3.64019	0.00497812	0.03915
ENSMUSG00000031934	Panx1	pannexin 1	7.32032	8.65743	6.83635	8.82156	7.07834	8.7395	1.66116	2.59e-06	5.86e-05
ENSMUSG00000003534	Ddr1	discoidin domain receptor family, member 1	10.4577	11.2902	9.65741	11.145	10.0575	11.2176	1.16004	0.00139496	0.0139885
ENSMUSG00000038658	Ric1	RAB6A GEF complex partner 1	7.91215	9.88862	8.81009	9.65969	8.36112	9.77415	1.41303	0.000467812	0.00561206
ENSMUSG00000006019	Dhx34	DEAH (Asp-Glu-Ala-His) box polypeptide 34	6.63777	7.88624	6.06773	7.77866	6.35275	7.83245	1.4797	0.000345299	0.0043269
ENSMUSG00000045039	Megf8	multiple EGF-like-domains 8	8.3501	9.43265	7.68315	8.95187	8.01663	9.19226	1.17563	0.00173547	0.0167278
ENSMUSG00000028532	Cachd1	cache domain containing 1	4.71108	6.32259	4.87374	6.51233	4.79241	6.41746	1.62505	0.00264067	0.0234843
ENSMUSG00000004500	Zfp324	zinc finger protein 324	5.37598	6.55022	4.76664	5.93525	5.07131	6.24274	1.17143	0.042668	0.203292
ENSMUSG00000064329	Scn1a	sodium channel, voltage-gated, type I, alpha	3.70582	5.49435	4.58942	5.77755	4.14762	5.63595	1.48833	0.0417815	0.20045
ENSMUSG00000022179	4931414P19Rik	RIKEN cDNA 4931414P19 gene	5.5547	6.32259	4.87374	6.65521	5.21422	6.4889	1.27468	0.0213103	0.121814
ENSMUSG00000035629	Rubcn	RUN domain and cysteine-rich domain containing, Beclin 1-interacting protein	7.23897	8.36328	6.65305	8.15244	6.94601	8.25786	1.31185	0.000771235	0.00857356
ENSMUSG00000030662	Ipo5	importin 5	9.18911	10.3946	8.72683	10.4061	8.95797	10.4003	1.44238	1.84e-06	4.29e-05
ENSMUSG00000054051	Ercc6	excision repair cross-complementing rodent repair deficiency, complementation group 6	6.06003	7.81012	7.32573	7.84972	6.69288	7.82992	1.13704	0.0487951	0.223532
ENSMUSG00000015599	Ttbk1	tau tubulin kinase 1	8.58633	9.36109	7.91398	9.28791	8.25015	9.3245	1.07435	0.00276311	0.0244336
ENSMUSG00000019796	Lrp11	low density lipoprotein receptor-related protein 11	6.25885	7.32727	5.65235	6.94211	5.9556	7.13469	1.17909	0.013484	0.0859359
ENSMUSG00000097406	Gm26833	predicted gene, 26833	2.92066	5.5885	3.5221	5.50307	3.22138	5.54579	2.32441	0.00204022	0.0191434
ENSMUSG00000013662	Atad1	ATPase family, AAA domain containing 1	6.66917	9.2963	8.27801	9.40039	7.47359	9.34835	1.87476	0.000755436	0.00841292
ENSMUSG00000102147	Gm38055	predicted gene, 38055	0	3.54096	0	4.0738	0	3.80738	3.80738	0.0043536	0.0352287
ENSMUSG00000052040	Klf13	Kruppel-like factor 13	10.1906	11.9897	9.66675	11.8807	9.92867	11.9352	2.00652	3.47e-11	1.82e-09
ENSMUSG00000028080	Lrba	LPS-responsive beige-like anchor	7.73804	9.16876	8.47373	9.28791	8.10588	9.22833	1.12245	0.00400809	0.0329932
ENSMUSG00000021756	Il6st	interleukin 6 signal transducer	7.44345	9.15344	7.6978	8.92391	7.57063	9.03867	1.46805	7.74e-06	0.000156304
ENSMUSG00000021754	Map3k1	mitogen-activated protein kinase kinase kinase 1	7.09614	8.82152	7.78956	8.75436	7.44285	8.78794	1.34509	0.000587797	0.00680999
ENSMUSG00000053390	Zfp952	zinc finger protein 952	4.37266	6.78706	5.62194	6.11084	4.9973	6.44895	1.45165	0.0302283	0.157905
ENSMUSG00000039801	2410089E03Rik	RIKEN cDNA 2410089E03 gene	5.96204	8.22355	7.74088	8.29022	6.85146	8.25688	1.40542	0.0410705	0.197811
ENSMUSG00000032855	Pkd1	polycystic kidney disease 1 homolog	8.30585	9.80529	7.84326	9.83505	8.07456	9.82017	1.74562	1.77e-08	6.23e-07
ENSMUSG00000022817	Itgb5	integrin beta 5	7.995	8.8645	7.23824	9.10081	7.61662	8.98265	1.36603	0.000359857	0.00448045
ENSMUSG00000063659	Zbtb18	zinc finger and BTB domain containing 18	8.75675	10.5533	9.25849	10.4278	9.00762	10.4906	1.48295	3.89e-06	8.42e-05
ENSMUSG00000022812	Gsk3b	glycogen synthase kinase 3 beta	9.24747	12.6095	10.5251	12.6371	9.88628	12.6233	2.73703	7.41e-10	3.18e-08
ENSMUSG00000027367	Stard7	START domain containing 7	6.78832	8.94679	7.64586	9.03263	7.21709	8.98971	1.77261	1.33e-05	0.000254552
ENSMUSG00000033722	BC034090	cDNA sequence BC034090	7.13038	8.29511	6.79607	8.26815	6.96322	8.28163	1.31841	0.000254756	0.00333906
ENSMUSG00000009614	Sardh	sarcosine dehydrogenase	4.21142	5.5885	4.4579	6.00807	4.33466	5.79829	1.46363	0.0220097	0.124803
ENSMUSG00000046791	Riox1	ribosomal oxygenase 1	5.37598	6.14806	5.23684	6.60914	5.30641	6.3786	1.07219	0.0422872	0.202284
ENSMUSG00000037887	Dusp8	dual specificity phosphatase 8	8.21304	9.14572	7.42593	8.82156	7.81948	8.98364	1.16415	0.00312835	0.0270787
ENSMUSG00000033417	Cacul1	CDK2 associated, cullin domain 1	7.40667	8.91534	8.0343	8.67271	7.72048	8.79403	1.07354	0.00572385	0.0437106
ENSMUSG00000044134	Fam109a	family with sequence similarity 109, member A	5.62042	7.09037	4.70995	7.42684	5.16518	7.25861	2.09342	4.02e-05	0.000679971
ENSMUSG00000027007	Ssfa2	sperm specific antigen 2	6.19557	7.96734	7.38124	7.97308	6.78841	7.97021	1.1818	0.0294028	0.154492
ENSMUSG00000056708	Ier5	immediate early response 5	8.57808	9.18392	7.72666	9.16988	8.15237	9.1769	1.02453	0.0102464	0.0696368
ENSMUSG00000024754	Tmem2	transmembrane protein 2	7.9763	10.2741	8.48221	10.3103	8.22926	10.2922	2.06294	9.06e-11	4.46e-09
ENSMUSG00000093930	Hmgcs1	3-hydroxy-3-methylglutaryl-Coenzyme A synthase 1	8.08505	9.86059	9.45885	9.87697	8.77195	9.86878	1.09683	0.0437729	0.206676
ENSMUSG00000053626	Tll1	tolloid-like	3.44067	7.1222	5.19615	7.30208	4.31841	7.21214	2.89373	9.69e-06	0.00018988
ENSMUSG00000038429	Usp5	ubiquitin specific peptidase 5 (isopeptidase T)	7.61447	8.64105	7.39928	8.6783	7.50688	8.65968	1.1528	0.00050632	0.00599697
ENSMUSG00000099689	Zfp383	zinc finger protein 383	4.37266	6.45346	5.68212	7.31648	5.02739	6.88497	1.85758	0.00339128	0.0287471
ENSMUSG00000031568	Rwdd4a	RWD domain containing 4A	6.68461	8.14051	6.87554	7.81969	6.78007	7.9801	1.20003	0.00172849	0.0166811
ENSMUSG00000025950	Idh1	isocitrate dehydrogenase 1 (NADP+), soluble	8.36456	9.56302	8.70886	9.52038	8.53671	9.5417	1.00499	0.00161754	0.0157894
ENSMUSG00000042607	Asb4	ankyrin repeat and SOCS box-containing 4	2.42795	4.66215	2.05189	4.32248	2.23992	4.49231	2.25239	0.0255863	0.139552
ENSMUSG00000056004	9330182L06Rik	RIKEN cDNA 9330182L06 gene	4.82696	6.70536	5.65235	6.46137	5.23965	6.58337	1.34372	0.019128	0.112463
ENSMUSG00000062116	Zfp954	zinc finger protein 954	4.02985	6.05218	2.86651	6.60914	3.44818	6.33066	2.88248	1.82e-05	0.000336139
ENSMUSG00000062110	Scfd2	Sec1 family domain containing 2	4.985	5.49435	4.23497	6.4352	4.60999	5.96478	1.35479	0.0340395	0.171891
ENSMUSG00000022604	Cep97	centrosomal protein 97	6.68461	9.67187	7.53601	9.60791	7.11031	9.63989	2.52958	2.8e-11	1.5e-09
ENSMUSG00000022607	Ptk2	PTK2 protein tyrosine kinase 2	7.33996	9.25383	8.06287	9.03698	7.70142	9.14541	1.44399	0.000174249	0.00243682
ENSMUSG00000025375	Aatk	apoptosis-associated tyrosine kinase	6.21697	7.93186	6.25769	8.02664	6.23733	7.97925	1.74192	4.34e-06	9.28e-05
ENSMUSG00000028293	Slc35a1	solute carrier family 35 (CMP-sialic acid transporter), member 1	4.77018	6.45346	5.62194	6.53715	5.19606	6.4953	1.29924	0.0272128	0.146042
ENSMUSG00000038777	Sema6c	sema domain, transmembrane domain (TM), and cytoplasmic domain, (semaphorin) 6C	5.5547	6.76706	5.52669	7.11692	5.54069	6.94199	1.4013	0.00279221	0.0246536
ENSMUSG00000022957	Itsn1	intersectin 1 (SH3 domain protein 1A)	8.70467	10.0337	8.81009	9.79703	8.75738	9.91539	1.158	7.93e-05	0.00123836
ENSMUSG00000032135	Mcam	melanoma cell adhesion molecule	8.44385	9.97613	7.98139	9.72595	8.21262	9.85104	1.63842	2.14e-07	6.06e-06
ENSMUSG00000024773	Atg2a	autophagy related 2A	6.45171	7.75028	6.19711	8.02664	6.32441	7.88846	1.56405	6.52e-05	0.00104396
ENSMUSG00000026198	Abcb6	ATP-binding cassette, sub-family B (MDR/TAP), member 6	5.21512	6.76706	5.02081	7.04952	5.11797	6.90829	1.79032	0.000216523	0.00291339
ENSMUSG00000006403	Adamts4	a disintegrin-like and metallopeptidase (reprolysin type) with thrombospondin type 1 motif, 4	6.91157	8.802	7.24823	8.58617	7.0799	8.69409	1.61418	4.27e-06	9.15e-05
ENSMUSG00000003153	Slc2a3	solute carrier family 2 (facilitated glucose transporter), member 3	4.44699	5.76016	4.4579	5.77755	4.45245	5.76886	1.31641	0.0367676	0.182199
ENSMUSG00000035722	Abca7	ATP-binding cassette, sub-family A (ABC1), member 7	4.44699	6.6842	3.97119	6.69986	4.20909	6.69203	2.48294	5.01e-06	0.000105438
ENSMUSG00000078566	Bnip3	BCL2/adenovirus E1B interacting protein 3	5.91043	7.45773	6.17633	7.18132	6.04338	7.31952	1.27614	0.00348125	0.0294136
ENSMUSG00000051853	Arf3	ADP-ribosylation factor 3	9.45759	11.8084	9.10483	11.7036	9.28121	11.756	2.47477	1.13e-18	1.23e-16
ENSMUSG00000040209	Zfp704	zinc finger protein 704	9.01067	11.3981	10.4119	11.3877	9.7113	11.3929	1.68165	0.000741368	0.00829288
ENSMUSG00000051323	Pcdh19	protocadherin 19	6.25885	7.91378	6.68281	7.55389	6.47083	7.73384	1.26301	0.00265742	0.0236153
ENSMUSG00000097915	A330009N23Rik	RIKEN cDNA A330009N23 gene	0	4.37567	0	2.05934	0	3.21751	3.21751	0.0146816	0.0919213
ENSMUSG00000111942	AC135641.1	---	4.21142	5.8767	3.97119	6.35372	4.0913	6.11521	2.02391	0.000899497	0.00973066
ENSMUSG00000030000	Add2	adducin 2 (beta)	7.58185	9.02042	6.72633	9.13779	7.15409	9.0791	1.92501	6.63e-07	1.71e-05
ENSMUSG00000073060	Zxda	zinc finger, X-linked, duplicated A	0	1.33339	0	4.4324	0	2.88289	2.88289	0.0226463	0.127638
ENSMUSG00000020902	Ntn1	netrin 1	3.44067	4.57283	0	5.34338	1.72034	4.95811	3.23777	0.0259214	0.140729
ENSMUSG00000096847	Tmem151b	transmembrane protein 151B	7.07285	9.00343	6.97511	9.39021	7.02398	9.19682	2.17284	3.84e-11	2e-09
ENSMUSG00000063160	Numbl	numb-like	7.9888	9.03721	7.84984	8.94261	7.91932	8.98991	1.07059	0.00063741	0.00729429
ENSMUSG00000048058	Ldlrad3	low density lipoprotein receptor class A domain containing 3	8.83496	9.51887	8.25343	9.80727	8.54419	9.66307	1.11887	0.00109846	0.0114839
ENSMUSG00000022412	Mief1	mitochondrial elongation factor 1	8.43474	9.18015	7.66835	9.3382	8.05155	9.25917	1.20763	0.00132085	0.0134067
ENSMUSG00000036875	Dna2	DNA replication helicase/nuclease 2	5.93647	7.34086	5.90049	6.92341	5.91848	7.13213	1.21365	0.00659158	0.0488991
ENSMUSG00000035529	Prdm4	PR domain containing 4	8.09664	9.13015	7.81666	8.90019	7.95665	9.01517	1.05852	0.00109663	0.0114699
ENSMUSG00000018548	Trim37	tripartite motif-containing 37	7.63846	10.1151	8.97252	9.86232	8.30549	9.9887	1.68321	0.000568354	0.00660111
ENSMUSG00000044340	Phlpp1	PH domain and leucine rich repeat protein phosphatase 1	8.22365	9.33756	7.69049	9.18566	7.95707	9.26161	1.30454	0.000110222	0.00165156
ENSMUSG00000006281	Tep1	telomerase associated protein 1	4.12349	5.71912	3.87133	5.77755	3.99741	5.74834	1.75093	0.00784822	0.0563179
ENSMUSG00000047067	Dusp28	dual specificity phosphatase 28	6.10664	7.43256	6.19711	7.38644	6.15187	7.4095	1.25763	0.00254443	0.0228185
ENSMUSG00000034354	Mtmr3	myotubularin related protein 3	9.07655	10.771	8.8335	10.5714	8.95502	10.6712	1.71617	1.11e-09	4.66e-08
ENSMUSG00000010045	Tmem115	transmembrane protein 115	6.33911	7.55422	5.68212	7.68182	6.01062	7.61802	1.6074	0.000263426	0.00343365
ENSMUSG00000055675	Kbtbd11	kelch repeat and BTB (POZ) domain containing 11	8.40708	9.79546	8.35859	10.0443	8.38283	9.91988	1.53704	1.24e-07	3.69e-06
ENSMUSG00000061894	Zscan20	zinc finger and SCAN domains 20	5.62042	6.66271	5.92561	7.33075	5.77301	6.99673	1.22372	0.011122	0.074074
ENSMUSG00000056091	St3gal5	ST3 beta-galactoside alpha-2,3-sialyltransferase 5	7.34968	9.00769	6.74055	8.84162	7.04512	8.92466	1.87954	1.66e-07	4.81e-06
ENSMUSG00000038822	Hace1	HECT domain and ankyrin repeat containing, E3 ubiquitin protein ligase 1	5.52068	6.80678	6.09012	6.99682	5.8054	6.9018	1.0964	0.0293732	0.154371
ENSMUSG00000037487	Ubr5	ubiquitin protein ligase E3 component n-recognin 5	8.18073	10.2882	9.42403	10.2097	8.80238	10.2489	1.44656	0.00224746	0.0206482
ENSMUSG00000030279	C2cd5	C2 calcium-dependent domain containing 5	6.87165	8.49675	7.78271	8.48775	7.32718	8.49225	1.16507	0.00976246	0.0671097
ENSMUSG00000030275	Etnk1	ethanolamine kinase 1	6.19557	8.45362	7.51961	8.36836	6.85759	8.41099	1.5534	0.00358433	0.0301102
ENSMUSG00000022335	Zfat	zinc finger and AT hook domain containing	4.82696	6.42821	4.76664	6.67771	4.7968	6.55296	1.75616	0.000811107	0.00895709
ENSMUSG00000068966	Zbtb34	zinc finger and BTB domain containing 34	6.92464	8.9289	7.51961	9.04133	7.22213	8.98511	1.76299	1.46e-06	3.47e-05
ENSMUSG00000075592	Nynrin	NYN domain and retroviral integrase containing	7.57358	9.16494	7.04553	9.12147	7.30955	9.14321	1.83365	5.9e-08	1.87e-06
ENSMUSG00000043639	Rbm20	RNA binding motif protein 20	4.71108	6.57343	5.4595	6.46137	5.08529	6.5174	1.43211	0.0118997	0.0779423
ENSMUSG00000039318	Rab3gap2	RAB3 GTPase activating protein subunit 2	5.96204	7.78051	6.4603	7.6366	6.21117	7.70856	1.49738	0.000430632	0.0052251
ENSMUSG00000029765	Plxna4	plexin A4	5.7727	7.87695	6.49427	8.04406	6.13348	7.9605	1.82702	3.02e-05	0.000525759
ENSMUSG00000024068	Spast	spastin	7.65424	9.09449	8.70524	9.30246	8.17974	9.19847	1.01874	0.03032	0.158278
ENSMUSG00000068036	Afdn	afadin, adherens junction formation factor	7.33018	9.0985	8.34003	8.84162	7.8351	8.97006	1.13496	0.0134531	0.0857861
ENSMUSG00000027087	Itgav	integrin alpha V	6.03615	7.48246	6.79607	7.58992	6.41611	7.53619	1.12008	0.0191481	0.112512
ENSMUSG00000001440	Kpnb1	karyopherin (importin) beta 1	9.90435	11.1302	10.0729	11.0957	9.98865	11.1129	1.12429	6.01e-05	0.000970422
ENSMUSG00000065870	Rnu3a	U3A small nuclear RNA	1.06717	1.33339	1.0348	7.8694	1.05099	4.60139	3.55041	1.76e-06	4.14e-05
ENSMUSG00000041241	Mul1	mitochondrial ubiquitin ligase activator of NFKB 1	7.56526	8.0274	6.68281	8.34746	7.12403	8.18743	1.0634	0.0179444	0.107413
ENSMUSG00000022684	Bfar	bifunctional apoptosis regulator	6.10664	7.19882	6.37171	7.8694	6.23918	7.53411	1.29494	0.00317025	0.0273281
ENSMUSG00000022687	Boc	biregional cell adhesion molecule-related/down-regulated by oncogenes (Cdon) binding protein	4.71108	5.71912	3.38398	5.5526	4.04753	5.63586	1.58833	0.0451923	0.211723
ENSMUSG00000025485	Ric8a	RIC8 guanine nucleotide exchange factor A	6.17385	7.22837	6.19711	7.16549	6.18548	7.19693	1.01145	0.0190293	0.112012
ENSMUSG00000039252	Lgi2	leucine-rich repeat LGI family, member 2	4.37266	6.20861	4.38735	5.69173	4.38001	5.95017	1.57017	0.0102447	0.0696368
ENSMUSG00000028165	Cisd2	CDGSH iron sulfur domain 2	6.89839	9.70377	8.24348	9.50474	7.57093	9.60426	2.03332	2.59e-05	0.000459017
ENSMUSG00000073889	Il11ra1	interleukin 11 receptor, alpha chain 1	5.21512	6.84543	3.87133	6.58554	4.54323	6.71548	2.17226	0.000511526	0.00604943
ENSMUSG00000052852	Reep1	receptor accessory protein 1	7.63846	8.97756	6.97511	9.16988	7.30679	9.07372	1.76693	1.02e-06	2.51e-05
ENSMUSG00000105204	Gm43738	predicted gene 43738	0	2.01431	1.63118	5.0986	0.81559	3.55645	2.74086	0.0207987	0.119387
ENSMUSG00000039929	Urb1	URB1 ribosome biogenesis 1 homolog (S. cerevisiae)	5.29779	7.38087	5.90049	6.63236	5.59914	7.00662	1.40748	0.00600139	0.0453552
ENSMUSG00000026114	Cnga3	cyclic nucleotide gated channel alpha 3	5.52068	6.32259	2.86651	6.46137	4.1936	6.39198	2.19838	0.0284192	0.150921
ENSMUSG00000026110	Mgat4a	mannoside acetylglucosaminyltransferase 4, isoenzyme A	4.82696	6.78706	6.4078	7.38644	5.61738	7.08675	1.46937	0.0334841	0.170043
ENSMUSG00000026112	Coa5	cytochrome C oxidase assembly factor 5	9.01067	10.4284	8.06852	10.5533	8.5396	10.4908	1.95124	1.9e-07	5.47e-06
ENSMUSG00000026113	Inpp4a	inositol polyphosphate-4-phosphatase, type I	6.58936	8.679	6.68281	8.86631	6.63608	8.77266	2.13657	2.72e-10	1.24e-08
ENSMUSG00000062312	Erbb2	erb-b2 receptor tyrosine kinase 2	6.29954	7.45773	5.65235	7.24296	5.97594	7.35034	1.3744	0.00282873	0.024882
ENSMUSG00000034145	Tmem63c	transmembrane protein 63c	3.57933	5.49435	3.76405	4.88321	3.67169	5.18878	1.51709	0.0461875	0.214919
ENSMUSG00000043467	Zbtb37	zinc finger and BTB domain containing 37	6.19557	8.12489	6.71197	7.90797	6.45377	8.01643	1.56266	0.000127941	0.00188084
ENSMUSG00000044857	Lemd2	LEM domain containing 2	7.25974	7.68784	6.0219	8.10343	6.64082	7.89563	1.25482	0.0192754	0.113175
ENSMUSG00000021294	Kif26a	kinesin family member 26A	5.62042	6.91975	5.76793	7.11692	5.69417	7.01834	1.32416	0.00389443	0.0321939
ENSMUSG00000079654	Prrt4	proline-rich transmembrane protein 4	5.48584	5.91355	4.23497	6.53715	4.86041	6.22535	1.36494	0.0452491	0.211904
ENSMUSG00000027765	P2ry1	purinergic receptor P2Y, G-protein coupled 1	3.44067	5.98453	3.38398	5.73528	3.41233	5.8599	2.44758	0.00028673	0.00369447
ENSMUSG00000058594	Fbxo18	F-box protein 18	7.01294	8.65743	7.37214	8.27554	7.19254	8.46649	1.27395	0.000596221	0.00689048
ENSMUSG00000046822	Slc39a3	solute carrier family 39 (zinc transporter), member 3	6.97575	8.28108	6.52745	8.30474	6.7516	8.29291	1.54131	3.23e-05	0.000558817
ENSMUSG00000036019	Tmtc2	transmembrane and tetratricopeptide repeat containing 2	7.51431	9.36109	8.92662	9.39361	8.22046	9.37735	1.15689	0.0377991	0.186021
ENSMUSG00000096592	Gm15801	predicted gene 15801	3.70582	5.94947	4.65094	6.20678	4.17838	6.07812	1.89974	0.00444395	0.0358604
ENSMUSG00000062252	Lhfpl5	lipoma HMGIC fusion partner-like 5	0	3.71803	0	3.93128	0	3.82466	3.82466	0.00427338	0.0346998
ENSMUSG00000020431	Adcy1	adenylate cyclase 1	8.27557	9.82718	8.41731	9.72054	8.34644	9.77386	1.42742	9.9e-07	2.44e-05
ENSMUSG00000028649	Macf1	microtubule-actin crosslinking factor 1	9.26299	11.1525	10.5933	10.9287	9.92813	11.0406	1.11248	0.0336828	0.17067
ENSMUSG00000020393	Kremen1	kringle containing transmembrane protein 1	8.12522	9.51587	7.72666	9.45025	7.92594	9.48306	1.55712	6.08e-07	1.59e-05
ENSMUSG00000004054	Map3k11	mitogen-activated protein kinase kinase kinase 11	7.1857	7.84869	6.63793	8.16842	6.91181	8.00855	1.09674	0.00685054	0.0505935
ENSMUSG00000029250	Polr2b	polymerase (RNA) II (DNA directed) polypeptide B	7.87224	9.50987	8.48221	9.56632	8.17723	9.53809	1.36087	0.000115911	0.00172573
ENSMUSG00000035007	Rundc1	RUN domain containing 1	6.33911	7.50678	5.87494	8.02664	6.10703	7.76671	1.65969	0.000101643	0.00153681
ENSMUSG00000045312	Lhfpl2	lipoma HMGIC fusion partner-like 2	5.7435	7.05782	4.65094	6.60914	5.19722	6.83348	1.63626	0.00449255	0.0361277
ENSMUSG00000024378	Stard4	StAR-related lipid transfer (START) domain containing 4	6.01187	8.52083	7.64586	8.35446	6.82887	8.43765	1.60878	0.00851748	0.0601818
ENSMUSG00000040097	Flywch1	FLYWCH-type zinc finger 1	7.81725	9.22114	7.4347	8.98381	7.62597	9.10248	1.4765	7.24e-06	0.000147212
ENSMUSG00000027508	Pag1	phosphoprotein associated with glycosphingolipid microdomains 1	7.15276	9.04553	8.0343	8.94724	7.59353	8.99639	1.40286	0.000781442	0.00866041
ENSMUSG00000067889	Sptbn2	spectrin beta, non-erythrocytic 2	9.33082	10.8348	8.70161	10.7716	9.01621	10.8032	1.78699	2.46e-08	8.43e-07
ENSMUSG00000021938	Pspc1	paraspeckle protein 1	7.61447	8.89706	7.59198	8.71683	7.60323	8.80694	1.20372	0.00019396	0.00265971
ENSMUSG00000036606	Plxnb2	plexin B2	9.75873	11.3342	9.42403	11.2254	9.59138	11.2798	1.68843	2.25e-09	9.06e-08
ENSMUSG00000030761	Myo7a	myosin VIIA	7.01294	8.78719	6.69746	8.6671	6.8552	8.72714	1.87195	3.74e-08	1.24e-06
ENSMUSG00000022519	Srl	sarcalumenin	5.45014	6.80678	5.73989	6.65521	5.59502	6.731	1.13598	0.0210927	0.120836
ENSMUSG00000035640	Cbarp	calcium channel, voltage-dependent, beta subunit associated regulatory protein	6.17385	7.48246	6.17633	7.47901	6.17509	7.48074	1.30565	0.00143022	0.0142636
ENSMUSG00000024600	Slc27a6	solute carrier family 27 (fatty acid transporter), member 6	4.02985	6.14806	4.38735	5.85855	4.2086	6.00331	1.79471	0.00392862	0.0324421
ENSMUSG00000047388	Atmin	ATM interactor	8.79638	9.67187	7.8629	9.59615	8.32964	9.63401	1.30437	0.000967831	0.0103358
ENSMUSG00000026609	Ush2a	usherin	6.23806	7.71939	6.38987	7.91746	6.31397	7.81843	1.50446	0.000127152	0.00187042
ENSMUSG00000042961	Egflam	EGF-like, fibronectin type III and laminin G domains	6.85809	8.36993	6.69746	8.68941	6.77778	8.52967	1.75189	6.61e-07	1.71e-05
ENSMUSG00000047307	Pcdhb13	protocadherin beta 13	0	3.54096	0	3.15702	0	3.34899	3.34899	0.0229629	0.129018
ENSMUSG00000058881	Zfp516	zinc finger protein 516	8.5233	9.86059	7.7689	9.73134	8.1461	9.79596	1.64986	3.05e-06	6.77e-05
ENSMUSG00000080440	Gm25848	predicted gene, 25848	6.50488	7.85817	7.51134	8.6783	7.00811	8.26823	1.26012	0.0115526	0.0761634
ENSMUSG00000045438	Cox19	cytochrome c oxidase assembly protein 19	7.30041	8.74181	6.99897	8.36836	7.14969	8.55508	1.40539	7.48e-05	0.00117629
ENSMUSG00000042428	Mgat3	mannoside acetylglucosaminyltransferase 3	7.4525	8.23815	7.11267	8.48137	7.28258	8.35976	1.07718	0.00286731	0.0251549
ENSMUSG00000044749	Abca6	ATP-binding cassette, sub-family A (ABC1), member 6	0	3.10428	0	3.15702	0	3.13065	3.13065	0.0435571	0.205935
ENSMUSG00000031906	Smpd3	sphingomyelin phosphodiesterase 3, neutral	8.05565	8.97756	7.49466	9.05857	7.77516	9.01807	1.24291	0.00037093	0.00458896
ENSMUSG00000056204	Pgpep1	pyroglutamyl-peptidase I	6.57286	7.57737	6.06773	7.06667	6.32029	7.32202	1.00172	0.0274556	0.146954
ENSMUSG00000015202	Cnksr3	Cnksr family member 3	4.44699	5.5885	4.65094	6.46137	4.54897	6.02494	1.47597	0.0145334	0.0911316
ENSMUSG00000022992	Kansl2	KAT8 regulatory NSL complex subunit 2	8.1643	9.34432	7.70507	9.26951	7.93469	9.30692	1.37223	2.37e-05	0.000426684
ENSMUSG00000022994	Adcy6	adenylate cyclase 6	8.07922	9.47023	8.34003	9.63115	8.20962	9.55069	1.34107	1.45e-05	0.000275285
ENSMUSG00000022995	Enah	enabled homolog (Drosophila)	8.67792	10.3177	9.65178	10.3441	9.16485	10.3309	1.16606	0.00573567	0.0437865
ENSMUSG00000036473	Tbc1d24	TBC1 domain family, member 24	7.11905	8.71597	7.07949	8.64444	7.09927	8.6802	1.58093	1.63e-06	3.85e-05
ENSMUSG00000097006	9530082P21Rik	RIKEN cDNA 9530082P21 gene	5.68327	6.86437	4.70995	7.19698	5.19661	7.03067	1.83406	0.000634372	0.00726664
ENSMUSG00000031847	1700030J22Rik	RIKEN cDNA 1700030J22 gene	4.29429	6.05218	4.38735	6.20678	4.34082	6.12948	1.78866	0.0024448	0.0220763
ENSMUSG00000026889	Rbm18	RNA binding motif protein 18	7.09614	8.96006	7.67577	8.88093	7.38595	8.92049	1.53454	2.79e-05	0.000489744
ENSMUSG00000026883	Dab2ip	disabled 2 interacting protein	9.29605	10.1464	8.70161	10.1345	8.99883	10.1404	1.1416	0.000516811	0.00609649
ENSMUSG00000061578	Ksr2	kinase suppressor of ras 2	6.48738	8.00197	6.49427	8.11995	6.49082	8.06096	1.57014	2.2e-05	0.000398656
ENSMUSG00000045180	Shroom2	shroom family member 2	6.48738	7.94971	6.51095	7.89843	6.49917	7.92407	1.4249	0.000154137	0.00219813
ENSMUSG00000032184	Lysmd2	LysM, putative peptidoglycan-binding, domain containing 2	4.93422	5.8767	3.38398	5.73528	4.1591	5.80599	1.64689	0.0416728	0.200175
ENSMUSG00000074886	Grk6	G protein-coupled receptor kinase 6	7.93169	8.63002	7.31627	8.8165	7.62398	8.72326	1.09928	0.00321729	0.0276029
ENSMUSG00000024811	Tnks2	tankyrase, TRF1-interacting ankyrin-related ADP-ribose polymerase 2	8.04373	10.0211	8.92662	9.80216	8.48517	9.91165	1.42648	0.00034101	0.00428465
ENSMUSG00000073295	Nudt11	nudix (nucleoside diphosphate linked moiety X)-type motif 11	3.44067	5.76016	4.65094	5.60048	4.04581	5.68032	1.63451	0.0359116	0.17883
ENSMUSG00000030850	Ate1	arginyltransferase 1	6.37763	7.96734	7.4347	7.96396	6.90616	7.96565	1.05948	0.0409852	0.197563
ENSMUSG00000029410	Ppef2	protein phosphatase, EF hand calcium-binding domain 2	6.97575	8.63555	7.04553	8.31195	7.01064	8.47375	1.46311	3e-05	0.000524651
ENSMUSG00000017861	Mybl2	myeloblastosis oncogene-like 2	7.49692	8.44735	7.37214	8.51299	7.43453	8.48017	1.04564	0.00198064	0.0186821
ENSMUSG00000019558	Slc6a8	solute carrier family 6 (neurotransmitter transporter, creatine), member 8	7.77459	8.77222	7.36298	9.01064	7.56878	8.89143	1.32265	0.000106522	0.00160126
ENSMUSG00000108268	Gm44187	predicted gene, 44187	2.69524	4.90105	2.64251	4.62992	2.66887	4.76548	2.09661	0.0214161	0.122269
ENSMUSG00000011427	Zfp790	zinc finger protein 790	4.58507	7.09037	6.27733	7.24296	5.4312	7.16666	1.73546	0.0123183	0.0800809
ENSMUSG00000108888	Gm45231	predicted gene 45231	0	3.33908	0	2.87497	0	3.10703	3.10703	0.0448139	0.210315
ENSMUSG00000039065	Fam173b	family with sequence similarity 173, member B	4.64945	6.90153	5.90049	7.21247	5.27497	7.057	1.78203	0.00282789	0.024882
ENSMUSG00000023965	Fbxl17	F-box and leucine-rich repeat protein 17	6.12939	7.35432	5.38903	7.22779	5.75921	7.29106	1.53184	0.00129636	0.0131867
ENSMUSG00000023961	Enpp4	ectonucleotide pyrophosphatase/phosphodiesterase 4	3.92972	7.15334	5.19615	6.29673	4.56293	6.72503	2.1621	0.000726316	0.00814794
ENSMUSG00000068373	D430041D05Rik	RIKEN cDNA D430041D05 gene	5.58793	6.86437	5.68212	6.94211	5.63503	6.90324	1.26822	0.00653184	0.0485779
ENSMUSG00000038916	Soga3	SOGA family member 3	7.04918	8.27401	7.24823	8.39576	7.14871	8.33489	1.18618	0.00084056	0.00923429
ENSMUSG00000020315	Sptbn1	spectrin beta, non-erythrocytic 1	9.35756	11.1821	10.0229	11.0317	9.69024	11.1069	1.41662	4.69e-05	0.000778784
ENSMUSG00000033658	Ddx19b	DEAD (Asp-Glu-Ala-Asp) box polypeptide 19b	7.04918	8.91079	8.36319	9.01064	7.70619	8.96072	1.25453	0.017703	0.106186
ENSMUSG00000026254	Eif4e2	eukaryotic translation initiation factor 4E member 2	9.84717	10.2254	8.53212	10.1923	9.18964	10.2088	1.0192	0.0426344	0.203206
ENSMUSG00000034022	Cpsf1	cleavage and polyadenylation specific factor 1	7.9888	8.99055	7.88866	9.16988	7.93873	9.08022	1.14149	0.000255573	0.00334624
ENSMUSG00000030302	Atp2b2	ATPase, Ca++ transporting, plasma membrane 2	7.42518	8.90165	7.91398	8.83663	7.66958	8.86914	1.19956	0.000798699	0.00883679
ENSMUSG00000031652	N4bp1	NEDD4 binding protein 1	6.85809	9.12623	6.31583	9.02826	6.58696	9.07724	2.49028	7.24e-13	4.68e-11
ENSMUSG00000031659	Adcy7	adenylate cyclase 7	2.09962	3.87572	2.86651	5.28597	2.48307	4.58085	2.09778	0.0277326	0.148049
ENSMUSG00000105112	Gm42778	predicted gene 42778	4.29429	5.83889	4.76664	6.14353	4.53046	5.99121	1.46075	0.0182988	0.108865
ENSMUSG00000026923	Notch1	notch 1	11.5846	12.3975	11.0208	12.3149	11.3027	12.3562	1.05351	0.00107827	0.0113337
ENSMUSG00000026924	Sec16a	SEC16 homolog A, endoplasmic reticulum export factor	7.845	8.7055	7.31627	9.2358	7.58064	8.97065	1.39001	0.000162872	0.00230308
ENSMUSG00000034687	Fras1	Fraser extracellular matrix complex subunit 1	5.62042	7.54251	6.21758	7.18132	5.919	7.36191	1.44291	0.00206928	0.0193384
ENSMUSG00000035378	Shq1	SHQ1 homolog (S. cerevisiae)	4.88159	6.01875	4.15229	6.63236	4.51694	6.32556	1.80862	0.00248849	0.0223955
ENSMUSG00000034973	Dopey1	dopey family member 1	6.15179	7.66641	7.07949	8.00011	6.61564	7.83326	1.21762	0.0132622	0.0847305
ENSMUSG00000043909	Trp53bp1	transformation related protein 53 binding protein 1	8.29583	9.82235	8.7304	10.1078	8.51311	9.96507	1.45196	8.27e-06	0.00016521
ENSMUSG00000042078	Svop	SV2 related protein	6.29954	7.19882	5.23684	6.65521	5.76819	6.92702	1.15883	0.04247	0.20267
ENSMUSG00000032536	Trak1	trafficking protein, kinesin binding 1	8.01957	8.8645	7.23824	9.09246	7.62891	8.97848	1.34957	0.000488836	0.00581941
ENSMUSG00000058239	Usf2	upstream transcription factor 2	10	10.7697	9.38835	10.721	9.6942	10.7454	1.05119	0.00145167	0.0144332
ENSMUSG00000058230	Arhgap35	Rho GTPase activating protein 35	9.38854	11.1312	9.68341	10.8713	9.53597	11.0012	1.46527	8.28e-07	2.08e-05
ENSMUSG00000056429	Tgoln1	trans-golgi network protein	6.78832	8.67364	7.50302	8.80633	7.14567	8.73998	1.59431	5.49e-05	0.00090005
ENSMUSG00000027646	Src	Rous sarcoma oncogene	8.23419	9.22114	7.76195	9.30607	7.99807	9.26361	1.26554	0.000118413	0.00175961
ENSMUSG00000004319	Clcn3	chloride channel, voltage-sensitive 3	6.96315	8.89706	8.0343	8.71139	7.49872	8.80422	1.3055	0.00542813	0.0418217
ENSMUSG00000004317	Clcn5	chloride channel, voltage-sensitive 5	5.0815	6.95553	6.09012	7.33075	5.58581	7.14314	1.55733	0.00455409	0.036547
ENSMUSG00000057134	Ado	2-aminoethanethiol (cysteamine) dioxygenase	8.54038	9.21746	7.69049	9.04566	8.11544	9.13156	1.01612	0.0114711	0.0757763
ENSMUSG00000047098	Rnf31	ring finger protein 31	7.01294	7.74006	6.23777	7.80954	6.62536	7.7748	1.14944	0.010134	0.0691955
ENSMUSG00000033361	Prrg3	proline rich Gla (G-carboxyglutamic acid) 3 (transmembrane)	7.46149	9.81019	7.40822	9.65119	7.43486	9.73069	2.29583	5.32e-15	4.35e-13
ENSMUSG00000037151	Lrrc20	leucine rich repeat containing 20	6.95042	8.2162	6.4603	8.26815	6.70536	8.24217	1.53681	4.83e-05	0.000800877
ENSMUSG00000019295	Tmem129	transmembrane protein 129	6.78832	7.36766	5.73989	7.44006	6.26411	7.40386	1.13975	0.0302489	0.157977
ENSMUSG00000092035	Peg10	paternally expressed 10	6.91157	8.14051	6.74055	7.79932	6.82606	7.96992	1.14385	0.0025502	0.0228539
ENSMUSG00000021221	Dpf3	D4, zinc and double PHD fingers, family 3	7.06106	8.14826	6.4078	7.81969	6.73443	7.98398	1.24954	0.00285936	0.0250946
ENSMUSG00000022043	Trim35	tripartite motif-containing 35	8.56145	9.81263	8.26331	9.91771	8.41238	9.86517	1.45279	8.27e-07	2.08e-05
ENSMUSG00000020576	Nbas	neuroblastoma amplified sequence	6.27933	8.23815	6.19711	8.27554	6.23822	8.25685	2.01863	2.73e-08	9.3e-07
ENSMUSG00000032338	Hcn4	hyperpolarization-activated, cyclic nucleotide-gated K+ 4	8.34525	8.94679	7.56026	8.98381	7.95276	8.9653	1.01254	0.00995767	0.0682908
ENSMUSG00000071253	Slc25a16	solute carrier family 25 (mitochondrial carrier, Graves disease autoantigen), member 16	6.46966	7.85817	7.19759	7.93624	6.83362	7.8972	1.06358	0.0179734	0.107532
ENSMUSG00000022865	Cxadr	coxsackie virus and adenovirus receptor	6.17385	8.44735	7.5998	8.58021	6.88682	8.51378	1.62696	0.00314881	0.0272054
ENSMUSG00000105230	Gm42433	predicted gene 42433	0	3.10428	0	3.77313	0	3.43871	3.43871	0.0163156	0.0997087
ENSMUSG00000031751	Amfr	autocrine motility factor receptor	9.25267	9.9431	8.64981	10.0203	8.95124	9.98169	1.03046	0.00214451	0.0198587
ENSMUSG00000003316	Glg1	golgi apparatus protein 1	7.32032	9.27876	7.99925	9.45677	7.65978	9.36776	1.70798	3.33e-06	7.31e-05
ENSMUSG00000046295	Ankle1	ankyrin repeat and LEM domain containing 1	5.37598	7.80032	6.06773	7.87914	5.72185	7.83973	2.11788	1.69e-06	3.99e-05
ENSMUSG00000046743	Fat4	FAT atypical cadherin 4	8.3306	10.3667	8.90469	10.3441	8.61764	10.3554	1.73775	1.33e-07	3.91e-06
ENSMUSG00000038736	Nudcd1	NudC domain containing 1	2.42795	6.40252	4.52516	5.85855	3.47656	6.13054	2.65398	0.00212529	0.0197197
ENSMUSG00000038733	Wdr26	WD repeat domain 26	7.995	11.1184	9.55653	10.9543	8.77577	11.0363	2.26057	1.06e-05	0.000205623
ENSMUSG00000004934	Pias4	protein inhibitor of activated STAT 4	7.07285	7.97607	6.29671	7.60173	6.68478	7.7889	1.10412	0.0146991	0.0919726
ENSMUSG00000045210	Vcpip1	valosin containing protein (p97)/p47 complex interacting protein 1	6.60568	8.52679	7.69049	8.11995	7.14809	8.32337	1.17529	0.0195328	0.114284
ENSMUSG00000037331	Larp1	La ribonucleoprotein domain family, member 1	9.14234	10.2327	8.97854	10.0551	9.06044	10.1439	1.08347	0.000149356	0.00213909
ENSMUSG00000030104	Edem1	ER degradation enhancer, mannosidase alpha-like 1	5.29779	5.76016	4.23497	6.72168	4.76638	6.24092	1.47454	0.0224032	0.126512
ENSMUSG00000051251	Nhlh1	nescient helix loop helix 1	5.45014	6.37637	4.82118	6.58554	5.13566	6.48095	1.34529	0.0141627	0.0891424
ENSMUSG00000061306	Slc38a10	solute carrier family 38, member 10	9.16729	10.077	8.34469	9.93648	8.75599	10.0068	1.25076	0.00072298	0.00812222
ENSMUSG00000038416	Cdc16	CDC16 cell division cycle 16	7.63846	8.72117	7.50302	8.6039	7.57074	8.66254	1.09179	0.000909289	0.00980932
ENSMUSG00000031274	Col4a5	collagen, type IV, alpha 5	5.58793	7.32727	6.54376	7.52936	6.06585	7.42831	1.36247	0.00845368	0.0598215
ENSMUSG00000031596	Slc7a2	solute carrier family 7 (cationic amino acid transporter, y+ system), member 2	3.57933	6.61876	5.52669	6.20678	4.55301	6.41277	1.85976	0.0254389	0.138885
ENSMUSG00000035455	Fignl1	fidgetin-like 1	6.01187	7.90466	6.71197	8.04406	6.36192	7.97436	1.61244	0.000198806	0.00271729
ENSMUSG00000033854	Kcnk10	potassium channel, subfamily K, member 10	4.82696	7.25733	5.49348	6.65521	5.16022	6.95627	1.79605	0.000622462	0.00714072
ENSMUSG00000026764	Kif5c	kinesin family member 5C	8.22893	10.4677	9.49705	10.0615	8.86299	10.2646	1.4016	0.00402614	0.0330951
ENSMUSG00000024892	Pcx	pyruvate carboxylase	6.21697	7.04127	6.0219	7.38644	6.11943	7.21386	1.09442	0.0125571	0.0812938
ENSMUSG00000021044	Adck1	aarF domain containing kinase 1	4.82696	6.78706	4.31317	6.00807	4.57007	6.39756	1.8275	0.00149675	0.014812
ENSMUSG00000034190	Chmp7	charged multivesicular body protein 7	7.78895	8.64653	6.98709	8.68941	7.38802	8.66797	1.27995	0.00138572	0.0139258
ENSMUSG00000017774	Myo1c	myosin IC	5.21512	6.42821	4.38735	5.89741	4.80124	6.16281	1.36158	0.0275955	0.147486
ENSMUSG00000017776	Crk	v-crk avian sarcoma virus CT10 oncogene homolog	8.38361	10.7251	9.01409	10.7677	8.69885	10.7464	2.04753	7.94e-10	3.4e-08
ENSMUSG00000041161	Otud3	OTU domain containing 3	5.25705	7.02452	5.31494	7.28752	5.286	7.15602	1.87003	4.53e-05	0.000756983
ENSMUSG00000008036	Ap2s1	adaptor-related protein complex 2, sigma 1 subunit	8.56145	9.17636	7.63067	9.25836	8.09606	9.21736	1.1213	0.00638274	0.0476511
ENSMUSG00000033526	Ppip5k1	diphosphoinositol pentakisphosphate kinase 1	5.62042	6.97309	5.87494	6.92341	5.74768	6.94825	1.20057	0.0101612	0.069294
ENSMUSG00000031965	Tbx20	T-box 20	3.92972	5.5885	3.76405	5.1638	3.84688	5.37615	1.52927	0.0336773	0.17067
ENSMUSG00000022280	Rnf19a	ring finger protein 19A	6.12939	8.2162	7.57621	8.16842	6.8528	8.19231	1.33951	0.023451	0.131223
ENSMUSG00000028879	Stx12	syntaxin 12	8.13087	9.52483	8.17183	9.08406	8.15135	9.30445	1.1531	0.000322696	0.00408532
ENSMUSG00000034602	Mon2	MON2 homolog, regulator of endosome to Golgi trafficking	7.24939	8.74181	7.6534	8.6039	7.4514	8.67285	1.22146	0.000605014	0.00697828
ENSMUSG00000042787	Exog	endo/exonuclease (5-3), endonuclease G-like	5.52068	6.55022	3.76405	7.0146	4.64236	6.78241	2.14005	0.00230196	0.0210412
ENSMUSG00000074102	Rbm15b	RNA binding motif protein 15B	10.1284	11.0299	9.48654	10.7975	9.80748	10.9137	1.10623	0.00105974	0.0111641
ENSMUSG00000045062	Pcdhb7	protocadherin beta 7	4.58507	5.94947	3.5221	5.5526	4.05358	5.75104	1.69745	0.0191673	0.112597
ENSMUSG00000020114	Cand1	cullin associated and neddylation disassociated 1	7.71567	9.46093	7.84326	9.37996	7.77946	9.42044	1.64098	5.03e-08	1.62e-06
ENSMUSG00000075271	Ttc30a1	tetratricopeptide repeat domain 30A1	5.17194	6.59628	5.15427	6.72168	5.16311	6.65898	1.49587	0.00274805	0.0243281
ENSMUSG00000075273	Ttc30b	tetratricopeptide repeat domain 30B	4.71108	6.50265	4.65094	5.34338	4.68101	5.92302	1.24201	0.0379237	0.186463
ENSMUSG00000024913	Lrp5	low density lipoprotein receptor-related protein 5	9.27324	10.4599	9.07708	10.2553	9.17516	10.3576	1.18245	3.35e-05	0.000575056
ENSMUSG00000030733	Sh2b1	SH2B adaptor protein 1	8.06158	9.14958	7.93886	9.00176	8.00022	9.07567	1.07545	0.000540483	0.00635007
ENSMUSG00000029869	Ephb6	Eph receptor B6	6.33911	7.13785	5.87494	7.19698	6.10703	7.16741	1.06039	0.0195549	0.114367
ENSMUSG00000009487	Otog	otogelin	0	4.26598	2.05189	3.93128	1.02595	4.09863	3.07268	0.0314468	0.162705
ENSMUSG00000047907	Tshz2	teashirt zinc finger family member 2	7.23897	9.35105	7.4171	8.95647	7.32804	9.15376	1.82573	3.46e-08	1.15e-06
ENSMUSG00000000628	Hk2	hexokinase 2	5.25705	7.5307	5.35246	7.30208	5.30476	7.41639	2.11163	1.53e-06	3.62e-05
ENSMUSG00000000627	Sema4f	sema domain, immunoglobulin domain (Ig), TM domain, and short cytoplasmic domain	4.02985	6.29493	3.23123	6.67771	3.63054	6.48632	2.85578	3.25e-06	7.19e-05
ENSMUSG00000025571	Tnrc6c	trinucleotide repeat containing 6C	8.38833	9.94976	8.66852	9.72864	8.52843	9.8392	1.31078	1.89e-05	0.000347253
ENSMUSG00000021215	Net1	neuroepithelial cell transforming gene 1	7.3104	8.25977	6.93857	8.36143	7.12449	8.3106	1.18611	0.00106079	0.0111701
ENSMUSG00000023809	Rps6ka2	ribosomal protein S6 kinase, polypeptide 2	8.61885	9.11836	7.32573	9.13779	7.97229	9.12807	1.15578	0.0208575	0.119673
ENSMUSG00000046441	Cmtr2	cap methyltransferase 2	4.51768	5.10595	2.37721	5.97212	3.44745	5.53903	2.09159	0.0328448	0.167708
ENSMUSG00000021987	Mtmr6	myotubularin related protein 6	7.20724	8.7672	8.01102	9.13779	7.60913	8.95249	1.34336	0.00116061	0.012058
ENSMUSG00000036503	Rnf13	ring finger protein 13	6.39651	7.99339	7.34447	7.90797	6.87049	7.95068	1.08019	0.0279078	0.148882
ENSMUSG00000037458	Azin1	antizyme inhibitor 1	7.59825	9.72725	9.20822	9.98239	8.40323	9.85482	1.45158	0.0122212	0.0796496
ENSMUSG00000030223	Ptpro	protein tyrosine phosphatase, receptor type, O	7.07285	8.09312	6.79607	8.08672	6.93446	8.08992	1.15546	0.00168738	0.0163384
ENSMUSG00000049502	Dtx3l	deltex 3-like, E3 ubiquitin ligase	4.21142	6.20861	5.06668	6.58554	4.63905	6.39708	1.75803	0.00373495	0.0311276
ENSMUSG00000114210	AC131709.1	---	0	2.47503	0	3.77313	0	3.12408	3.12408	0.0338025	0.171027
ENSMUSG00000024037	Wdr4	WD repeat domain 4	6.80255	8.08506	7.20786	7.96396	7.0052	8.02451	1.01931	0.00951862	0.0657432
ENSMUSG00000024036	Slc37a1	solute carrier family 37 (glycerol-3-phosphate transporter), member 1	4.93422	6.37637	4.97343	6.35372	4.95383	6.36504	1.41122	0.00846787	0.0598856
ENSMUSG00000001802	Lrp3	low density lipoprotein receptor-related protein 3	8.47082	9.28228	7.6534	9.46649	8.06211	9.37439	1.31228	0.000565029	0.00657532
ENSMUSG00000041534	Rbp3	retinol binding protein 3, interstitial	10.8524	11.9514	10.2019	11.9545	10.5271	11.953	1.42585	1.36e-05	0.00025966
ENSMUSG00000040661	Rad54l2	RAD54 like 2 (S. cerevisiae)	8.97971	10.7264	8.79994	10.6026	8.88983	10.6645	1.77466	1.03e-10	5.03e-09
ENSMUSG00000027079	Clp1	CLP1, cleavage and polyadenylation factor I subunit	5.03406	6.91975	5.38903	6.4352	5.21154	6.67748	1.46594	0.00450051	0.0361792
ENSMUSG00000061436	Hipk2	homeodomain interacting protein kinase 2	9.76056	10.8106	9.38383	10.3476	9.57219	10.5791	1.00694	0.00161175	0.0157564
ENSMUSG00000085968	Gm13027	predicted gene 13027	3.11558	5.16826	3.23123	5.34338	3.1734	5.25582	2.08242	0.00796657	0.0570139
ENSMUSG00000031517	Gpm6a	glycoprotein m6a	8.85557	10.4156	9.88249	10.3789	9.36903	10.3973	1.02823	0.0206837	0.118814
ENSMUSG00000091952	Gm17709	predicted gene, 17709	3.57933	5.16826	1.63118	4.62992	2.60525	4.89909	2.29383	0.0354857	0.177467
ENSMUSG00000056413	Adap1	ArfGAP with dual PH domains 1	4.985	5.76016	2.64251	6.14353	3.81375	5.95185	2.13809	0.0274545	0.146954
ENSMUSG00000068284	Usf3	upstream transcription factor family member 3	6.45171	9.38096	7.15575	8.53164	6.80373	8.9563	2.15257	3.93e-07	1.06e-05
ENSMUSG00000043670	Diras1	DIRAS family, GTP-binding RAS-like 1	7.58185	8.63002	6.55989	8.59801	7.07087	8.61402	1.54315	0.000428012	0.00519872
ENSMUSG00000018707	Dync1h1	dynein cytoplasmic 1 heavy chain 1	10.0854	11.5939	9.89367	11.3576	9.98955	11.4757	1.48618	9.74e-08	2.94e-06
ENSMUSG00000060568	Fam78b	family with sequence similarity 78, member B	6.48738	7.99339	7.02244	7.76821	6.75491	7.8808	1.12589	0.00732917	0.0533519
ENSMUSG00000036206	Sh3bp4	SH3-domain binding protein 4	8.42097	9.76806	8.01688	9.61084	8.21893	9.68945	1.47052	2.01e-06	4.66e-05
ENSMUSG00000004748	Mtfp1	mitochondrial fission process 1	5.48584	6.6842	5.23684	6.29673	5.36134	6.49046	1.12912	0.0288075	0.152406
ENSMUSG00000027894	Slc6a17	solute carrier family 6 (neurotransmitter transporter), member 17	7.10764	8.44106	6.65305	8.14439	6.88034	8.29272	1.41238	0.000179416	0.0024961
ENSMUSG00000008305	Tle1	transducin-like enhancer of split 1	8.96397	9.96081	8.72325	9.81236	8.84361	9.88658	1.04297	0.000379516	0.00467374
ENSMUSG00000035798	Zdhhc17	zinc finger, DHHC domain containing 17	6.88508	8.58505	7.92024	8.63297	7.40266	8.60901	1.20635	0.0106618	0.0716461
ENSMUSG00000045733	Sprn	shadow of prion protein	4.77018	6.17865	4.38735	5.85855	4.57877	6.0186	1.43984	0.0165637	0.100867
ENSMUSG00000032228	Tcf12	transcription factor 12	8.86916	10.5342	9.9189	10.4128	9.39403	10.4735	1.07949	0.0156453	0.0964457
ENSMUSG00000032834	Pwp2	PWP2 periodic tryptophan protein homolog (yeast)	6.33911	7.40695	5.97455	7.38644	6.15683	7.3967	1.23986	0.00364559	0.0305259
ENSMUSG00000000275	Trim25	tripartite motif-containing 25	5.68327	7.13785	5.23684	7.28752	5.46006	7.21269	1.75263	0.000134692	0.00196647
ENSMUSG00000000276	Dgke	diacylglycerol kinase, epsilon	6.25885	7.56584	7.09063	7.94554	6.67474	7.75569	1.08095	0.0252462	0.138317
ENSMUSG00000041702	Btbd7	BTB (POZ) domain containing 7	7.37846	9.85586	8.66107	9.72325	8.01976	9.78956	1.76979	0.000188153	0.00260369
ENSMUSG00000051351	Zfp46	zinc finger protein 46	5.68327	9.42947	5.79544	9.14184	5.73935	9.28565	3.5463	3.22e-25	6.36e-23
ENSMUSG00000051359	Ncald	neurocalcin delta	7.3104	8.12489	6.80962	8.0527	7.06001	8.08879	1.02878	0.00814692	0.0580555
ENSMUSG00000036040	Adamtsl2	ADAMTS-like 2	0	2.47503	0	3.77313	0	3.12408	3.12408	0.0338025	0.171027
ENSMUSG00000036046	5031439G07Rik	RIKEN cDNA 5031439G07 gene	7.82424	9.53077	7.59198	9.13779	7.70811	9.33428	1.62617	4.01e-07	1.08e-05
ENSMUSG00000113665	CT009757.5	---	0	3.54096	0	2.52404	0	3.0325	3.0325	0.0477541	0.220146
ENSMUSG00000048027	Rgmb	repulsive guidance molecule family member B	6.15179	7.72976	5.73989	7.79932	5.94584	7.76454	1.8187	8.62e-06	0.000171635
ENSMUSG00000031302	Nlgn3	neuroligin 3	6.89839	9.4764	7.85638	9.63977	7.37739	9.55809	2.1807	7.16e-08	2.22e-06
ENSMUSG00000029163	Emilin1	elastin microfibril interfacer 1	3.11558	6.34973	2.64251	4.95863	2.87904	5.65418	2.77514	0.000223433	0.00299085
ENSMUSG00000033326	Kdm4a	lysine (K)-specific demethylase 4A	8.67405	10.5822	8.83018	10.5654	8.75212	10.5738	1.82168	5.14e-11	2.59e-09
ENSMUSG00000011960	Ccnt1	cyclin T1	7.10764	9.17636	8.5362	9.25836	7.82192	9.21736	1.39544	0.010069	0.0688522
ENSMUSG00000028347	Tmeff1	transmembrane protein with EGF-like and two follistatin-like domains 1	8.50602	9.92742	8.687	9.58131	8.59651	9.75437	1.15786	0.000174319	0.00243682
ENSMUSG00000052459	Atp6v1a	ATPase, H+ transporting, lysosomal V1 subunit A	6.19557	8.48456	7.80318	8.51299	6.99937	8.49878	1.4994	0.0139964	0.0882621
ENSMUSG00000026596	Abl2	v-abl Abelson murine leukemia viral oncogene 2 (arg, Abelson-related gene)	7.33996	9.49171	8.41731	9.4272	7.87863	9.45945	1.58082	0.000327783	0.00414523
ENSMUSG00000030536	Iqgap1	IQ motif containing GTPase activating protein 1	7.58185	8.36993	7.13437	8.45557	7.35811	8.41275	1.05464	0.00378708	0.0314512
ENSMUSG00000030539	Sema4b	sema domain, immunoglobulin domain (Ig), transmembrane domain (TM) and short cytoplasmic domain, (semaphorin) 4B	7.90557	8.81667	7.16632	8.98381	7.53595	8.90024	1.36429	0.000342275	0.00429592
ENSMUSG00000034324	Tmem132c	transmembrane protein 132C	4.77018	5.71912	4.65094	6.56155	4.71056	6.14033	1.42977	0.0137591	0.0870479
ENSMUSG00000069227	Gprin1	G protein-regulated inducer of neurite outgrowth 1	8.35976	9.59456	7.35375	9.54506	7.85676	9.56981	1.71306	1.95e-05	0.000357934
ENSMUSG00000079259	Trim71	tripartite motif-containing 71	5.17194	7.1222	6.4603	7.22779	5.81612	7.175	1.35887	0.0260355	0.141119
ENSMUSG00000025228	Actr1a	ARP1 actin-related protein 1A, centractin alpha	9.93535	10.7622	9.06017	10.7224	9.49776	10.7423	1.24453	0.000890882	0.00966433
ENSMUSG00000040351	Ankib1	ankyrin repeat and IBR domain containing 1	7.1857	8.81667	7.4607	8.5921	7.3232	8.70438	1.38119	6.05e-05	0.000975974
ENSMUSG00000040356	Skiv2l	superkiller viralicidic activity 2-like (S. cerevisiae)	6.58936	8.01897	6.54376	7.81969	6.56656	7.91933	1.35277	0.000343205	0.00430527
ENSMUSG00000040354	Mars	methionine-tRNA synthetase	6.85809	7.99339	5.97455	8.45557	6.41632	8.22448	1.80815	4.47e-05	0.000747469
ENSMUSG00000041915	Ammecr1l	AMME chromosomal region gene 1-like	7.3104	9.02463	7.94501	8.97476	7.62771	8.9997	1.37199	0.000233243	0.00309554
ENSMUSG00000063681	Crb1	crumbs family member 1, photoreceptor morphogenesis associated	7.65424	9.33417	8.50738	9.07137	8.08081	9.20277	1.12196	0.00720681	0.0527077
ENSMUSG00000036106	Prr5	proline rich 5 (renal)	6.08353	7.71939	4.58942	7.27282	5.33647	7.49611	2.15963	0.000231179	0.00307418
ENSMUSG00000067586	S1pr3	sphingosine-1-phosphate receptor 3	8.37887	9.69586	7.6534	9.77633	8.01613	9.7361	1.71996	8.19e-07	2.07e-05
ENSMUSG00000021903	Galnt15	UDP-N-acetyl-alpha-D-galactosamine:polypeptide N-acetylgalactosaminyltransferase 15	6.17385	7.40695	6.13387	7.42684	6.15386	7.4169	1.26304	0.00228827	0.0209571
ENSMUSG00000041552	Ptchd1	patched domain containing 1	5.7727	6.97309	6.25769	7.19698	6.01519	7.08503	1.06984	0.0245751	0.135917
ENSMUSG00000097796	Gm16702	predicted gene, 16702	4.71108	6.40252	4.70995	5.60048	4.71051	6.0015	1.29099	0.0289506	0.152769
ENSMUSG00000027995	Tlr2	toll-like receptor 2	0	3.87572	2.05189	4.80362	1.02595	4.33967	3.31372	0.0110999	0.0740079
ENSMUSG00000027993	Trim2	tripartite motif-containing 2	6.55616	8.28811	7.38124	8.33336	6.9687	8.31074	1.34204	0.00211802	0.0196734
ENSMUSG00000034525	Ice1	interactor of little elongation complex ELL subunit 1	7.16382	9.20265	8.30218	8.78576	7.733	8.99421	1.2612	0.00944798	0.0653908
ENSMUSG00000035696	Rnf38	ring finger protein 38	9.4395	11.1428	10.0673	11.0425	9.7534	11.0927	1.33928	8.95e-05	0.00137968
ENSMUSG00000020653	Klf11	Kruppel-like factor 11	6.77396	8.71074	7.29715	8.71139	7.03556	8.71107	1.67551	5.01e-06	0.000105438
ENSMUSG00000020654	Adcy3	adenylate cyclase 3	4.12349	5.83889	3.76405	5.93525	3.94377	5.88707	1.9433	0.00261768	0.0233065
ENSMUSG00000020658	Efr3b	EFR3 homolog B	7.67758	8.82636	6.99897	8.55005	7.33827	8.6882	1.34993	0.000426772	0.00518635
ENSMUSG00000027381	Bcl2l11	BCL2-like 11 (apoptosis facilitator)	7.63051	8.69496	7.73379	8.86141	7.68215	8.77818	1.09603	0.00082576	0.0090912
ENSMUSG00000040687	Madd	MAP-kinase activating death domain	8.46188	10.3211	7.97539	10.2849	8.21864	10.303	2.08437	6.47e-12	3.71e-10
ENSMUSG00000026380	Tfcp2l1	transcription factor CP2-like 1	0	3.10428	0	3.15702	0	3.13065	3.13065	0.0435571	0.205935
ENSMUSG00000026383	Epb41l5	erythrocyte membrane protein band 4.1 like 5	7.94458	9.22847	7.82336	9.05857	7.88397	9.14352	1.25955	4.54e-05	0.000756983
ENSMUSG00000001435	Col18a1	collagen, type XVIII, alpha 1	7.68528	8.40916	7.24823	8.85649	7.46675	8.63282	1.16607	0.00149432	0.0148005
ENSMUSG00000001436	Slc19a1	solute carrier family 19 (folate transporter), member 1	6.21697	7.48246	5.97455	6.72168	6.09576	7.10207	1.00631	0.0293076	0.1542
ENSMUSG00000045466	Zfp956	zinc finger protein 956	5.7435	7.04127	5.4595	6.48708	5.6015	6.76417	1.16267	0.0179408	0.107413
ENSMUSG00000025437	Usp33	ubiquitin specific peptidase 33	6.06003	7.89548	7.03403	7.61345	6.54703	7.75447	1.20743	0.0167698	0.101739
ENSMUSG00000056234	Ncoa4	nuclear receptor coactivator 4	6.50488	8.38312	6.91369	7.96396	6.70929	8.17354	1.46425	0.000207221	0.00281418
ENSMUSG00000025384	Faap100	Fanconi anemia core complex associated protein 100	6.41515	7.13785	5.49348	7.70391	5.95432	7.42088	1.46656	0.0036197	0.0303418
ENSMUSG00000070327	Rnf213	ring finger protein 213	5.0815	6.26672	3.97119	5.81862	4.52634	6.04267	1.51633	0.0257565	0.140193
ENSMUSG00000034667	Xpot	exportin, tRNA (nuclear export receptor for tRNAs)	7.06106	7.83914	6.63793	7.95478	6.8495	7.89696	1.04746	0.00777956	0.0559547
ENSMUSG00000019877	Serinc1	serine incorporator 1	8.05565	9.63373	9.29749	9.77372	8.67657	9.70373	1.02716	0.0454485	0.212624
ENSMUSG00000019876	Pkib	protein kinase inhibitor beta, cAMP dependent, testis specific	6.89839	8.30207	7.05694	8.23819	6.97766	8.27013	1.29247	0.000283705	0.00366321
ENSMUSG00000054408	Spcs3	signal peptidase complex subunit 3 homolog (S. cerevisiae)	6.65355	8.28811	7.83666	8.38212	7.24511	8.33512	1.09001	0.0401567	0.194614
ENSMUSG00000033416	Gucd1	guanylyl cyclase domain containing 1	6.72998	8.04411	6.55989	8.01785	6.64493	8.03098	1.38605	0.000175192	0.0024417
ENSMUSG00000033419	Snap91	synaptosomal-associated protein 91	6.01187	7.68784	6.72633	7.47901	6.3691	7.58343	1.21433	0.00911737	0.0635548
ENSMUSG00000020844	Nxn	nucleoredoxin	8.35976	9.04968	7.69049	9.47293	8.02513	9.26131	1.23618	0.00085838	0.0093815
ENSMUSG00000020846	Rflnb	refilin B	5.03406	7.18382	6.17633	6.88526	5.6052	7.03454	1.42934	0.0146404	0.0917283
ENSMUSG00000020841	Cpd	carboxypeptidase D	6.78832	8.01049	7.6978	8.52545	7.24306	8.26797	1.02491	0.0317665	0.163814
ENSMUSG00000026854	Usp20	ubiquitin specific peptidase 20	6.81664	7.36766	5.7113	7.73642	6.26397	7.55204	1.28807	0.0142306	0.0894488
ENSMUSG00000035247	Hectd1	HECT domain E3 ubiquitin protein ligase 1	7.33018	9.21007	8.34003	8.88093	7.8351	9.0455	1.2104	0.0077498	0.055822
ENSMUSG00000046312	AI464131	expressed sequence AI464131	6.08353	7.18382	4.23497	6.51233	5.15925	6.84808	1.68883	0.0230531	0.129431
ENSMUSG00000046314	Stxbp6	syntaxin binding protein 6 (amisyn)	5.21512	8.07697	6.78239	7.92688	5.99876	8.00192	2.00317	0.000713365	0.00804128
ENSMUSG00000043496	Tril	TLR4 interactor with leucine-rich repeats	8.20235	9.86295	7.69049	9.53278	7.94642	9.69786	1.75144	1.03e-07	3.1e-06
ENSMUSG00000028456	Unc13b	unc-13 homolog B (C. elegans)	6.91157	8.43473	7.4607	8.58021	7.18614	8.50747	1.32133	0.000564508	0.00657279
ENSMUSG00000028452	Vcp	valosin containing protein	8.67018	10.0992	8.59608	9.95962	8.63313	10.0294	1.39627	7.12e-07	1.82e-05
ENSMUSG00000030806	Stx1b	syntaxin 1B	8.92874	11.1351	7.99925	11.0119	8.46399	11.0735	2.60947	6.34e-13	4.13e-11
ENSMUSG00000046873	Mbtps2	membrane-bound transcription factor peptidase, site 2	5.29779	8.422	7.16632	7.93624	6.23206	8.17912	1.94706	0.00350895	0.0296112
ENSMUSG00000057522	Spop	speckle-type POZ protein	9.1141	11.8428	10.0617	11.6363	9.58788	11.7395	2.15166	3.36e-08	1.12e-06
ENSMUSG00000002393	Nr2f6	nuclear receptor subfamily 2, group F, member 6	3.70582	6.20861	2.05189	5.93525	2.87886	6.07193	3.19307	3.79e-05	0.000643367
ENSMUSG00000079144	A130010J15Rik	RIKEN cDNA A130010J15 gene	4.02985	6.29493	4.06458	5.5526	4.04722	5.92376	1.87655	0.00313605	0.0271353
ENSMUSG00000000532	Acvr1b	activin A receptor, type 1B	8.13649	9.55721	7.78271	9.6369	7.9596	9.59706	1.63746	8.14e-08	2.5e-06
ENSMUSG00000022759	Lrrc74b	leucine rich repeat containing 74B	0	3.54096	0	3.77313	0	3.65705	3.65705	0.00823817	0.0585984
ENSMUSG00000020448	Rnf185	ring finger protein 185	8.15324	8.98623	7.63829	9.37308	7.89576	9.17966	1.2839	0.000245717	0.00323368
ENSMUSG00000028613	Lrp8	low density lipoprotein receptor-related protein 8, apolipoprotein e receptor	8.7749	10.921	8.79655	10.7439	8.78572	10.8325	2.04673	6.56e-14	4.82e-12
ENSMUSG00000028612	Lrp8os1	low density lipoprotein receptor-related protein 8, apolipoprotein e receptor, opposite strand 1	0	2.47503	0	3.59548	0	3.03526	3.03526	0.0456087	0.212989
ENSMUSG00000039037	St6galnac5	ST6 (alpha-N-acetyl-neuraminyl-2,3-beta-galactosyl-1,3)-N-acetylgalactosaminide alpha-2,6-sialyltransferase 5	4.58507	7.43256	5.19615	7.18132	4.89061	7.30694	2.41633	6.84e-07	1.76e-05
ENSMUSG00000025199	Chuk	conserved helix-loop-helix ubiquitous kinase	4.71108	7.5307	6.21758	7.37272	5.46433	7.45171	1.98738	0.00116255	0.0120728
ENSMUSG00000033596	Rfwd3	ring finger and WD repeat domain 3	7.70055	9.31364	8.44796	9.33113	8.07426	9.32238	1.24813	0.00118706	0.0122565
ENSMUSG00000033624	Pdpr	pyruvate dehydrogenase phosphatase regulatory subunit	6.19557	7.48246	6.74055	7.71483	6.46806	7.59864	1.13058	0.0104335	0.070569
ENSMUSG00000033623	Pcgf3	polycomb group ring finger 3	9.36477	10.546	9.57252	10.4145	9.46864	10.4802	1.01161	0.000502793	0.00596125
ENSMUSG00000033628	Pik3c3	phosphatidylinositol 3-kinase catalytic subunit type 3	5.7435	7.10637	5.23684	7.04952	5.49017	7.07794	1.58777	0.000769367	0.00855687
ENSMUSG00000023169	Slc38a1	solute carrier family 38, member 1	9.66841	10.9732	9.92669	10.7637	9.79755	10.8685	1.07093	0.000296801	0.00379661
ENSMUSG00000074785	Plxnc1	plexin C1	6.87165	8.422	6.93857	8.27554	6.90511	8.34877	1.44366	3.8e-05	0.000644835
ENSMUSG00000026374	Tsn	translin	7.62251	9.75543	8.53212	9.71783	8.07731	9.73663	1.65931	3.07e-05	0.000533528
ENSMUSG00000057738	Sptan1	spectrin alpha, non-erythrocytic 1	9.9305	11.5181	10.2684	11.4922	10.0994	11.5052	1.40571	1.78e-06	4.17e-05
ENSMUSG00000041992	Rapgef5	Rap guanine nucleotide exchange factor (GEF) 5	5.82938	7.43256	6.35332	7.21247	6.09135	7.32252	1.23116	0.00728512	0.0531141
ENSMUSG00000085105	Gm12758	predicted gene 12758	3.57933	5.80006	3.23123	4.95863	3.40528	5.37935	1.97407	0.00841523	0.0595856
ENSMUSG00000009470	Tnpo1	transportin 1	9.22652	10.9278	10.523	11.0978	9.87478	11.0128	1.13802	0.0257511	0.140193
ENSMUSG00000039611	Tmem246	transmembrane protein 246	6.19557	7.35432	5.38903	7.31648	5.7923	7.3354	1.5431	0.00132705	0.0134579
ENSMUSG00000022098	Bmp1	bone morphogenetic protein 1	6.01187	6.95553	5.27642	6.99682	5.64415	6.97617	1.33203	0.00816377	0.0581578
ENSMUSG00000022095	Fam160b2	family with sequence similarity 160, member B2	6.85809	9.37767	7.24823	9.07984	7.05316	9.22876	2.1756	1.55e-10	7.43e-09
ENSMUSG00000022096	Hr	hairless	3.82211	5.5422	3.64814	5.28597	3.73512	5.41408	1.67896	0.0200224	0.116043
ENSMUSG00000020261	Slc36a1	solute carrier family 36 (proton/amino acid symporter), member 1	7.04918	8.422	6.78239	8.51923	6.91579	8.47062	1.55483	7.97e-06	0.000160479
ENSMUSG00000035615	Frmpd1	FERM and PDZ domain containing 1	7.65424	8.47226	6.52745	8.23819	7.09084	8.35523	1.26438	0.00875106	0.0614786
ENSMUSG00000037926	Ssh2	slingshot homolog 2 (Drosophila)	7.4525	8.79708	7.69049	8.7649	7.5715	8.78099	1.20949	0.000279656	0.00361693
ENSMUSG00000018415	Gid4	GID complex subunit 4, VID24 homolog	8.39774	11.2963	8.84012	11.1277	8.61893	11.212	2.59309	1.5e-17	1.49e-15
ENSMUSG00000032839	Trpc1	transient receptor potential cation channel, subfamily C, member 1	3.70582	6.45346	5.19615	6.14353	4.45098	6.29849	1.84751	0.0113067	0.0750083
ENSMUSG00000025324	Atp10a	ATPase, class V, type 10A	4.44699	6.14806	3.38398	5.3986	3.91549	5.77333	1.85784	0.0103087	0.0699114
ENSMUSG00000027304	Rtf1	RTF1, Paf1/RNA polymerase II complex component	7.81022	9.22481	8.395	9.01507	8.10261	9.11994	1.01732	0.00597695	0.0451852
ENSMUSG00000074629	4930518I15Rik	RIKEN cDNA 4930518I15 gene	3.70582	6.52663	5.19615	5.97212	4.45098	6.24937	1.79839	0.0148528	0.0925873
ENSMUSG00000045973	Slc25a51	solute carrier family 25, member 51	7.94458	9.36775	7.80318	9.91771	7.87388	9.64273	1.76885	5.81e-08	1.85e-06
ENSMUSG00000045975	C2cd2	C2 calcium-dependent domain containing 2	5.96204	7.5307	5.90049	7.22779	5.93127	7.37924	1.44798	0.000670265	0.00760789
ENSMUSG00000028962	Slc4a2	solute carrier family 4 (anion exchanger), member 2	6.62181	7.27159	5.4595	7.14948	6.04066	7.21053	1.16988	0.0384803	0.188525
ENSMUSG00000035151	Elmod2	ELMO/CED-12 domain containing 2	5.0815	7.81986	7.05694	7.67065	6.06922	7.74525	1.67604	0.0249642	0.13742
ENSMUSG00000041817	Fam169a	family with sequence similarity 169, member A	4.29429	6.93775	6.29671	7.21247	5.2955	7.07511	1.77961	0.024432	0.135479
ENSMUSG00000051224	Tceanc	transcription elongation factor A (SII) N-terminal and central domain containing	4.44699	6.95553	5.87494	6.3814	5.16097	6.66846	1.5075	0.027709	0.14799
ENSMUSG00000051220	Ercc6l	excision repair cross-complementing rodent repair deficiency complementation group 6 like	4.37266	6.66271	5.35246	6.53715	4.86256	6.59993	1.73737	0.00346486	0.0292989
ENSMUSG00000051228	Nyx	nyctalopin	0	3.54096	0	4.20349	0	3.87223	3.87223	0.00320362	0.0274958
ENSMUSG00000057101	Zfp180	zinc finger protein 180	6.46966	8.42838	7.93268	8.52545	7.20117	8.47692	1.27575	0.0303936	0.15852
ENSMUSG00000103507	Gm38375	predicted gene, 38375	0	2.8237	0	3.39284	0	3.10827	3.10827	0.0437787	0.206676
ENSMUSG00000018166	Erbb3	erb-b2 receptor tyrosine kinase 3	0	3.10428	0	3.59548	0	3.34988	3.34988	0.022459	0.126732
ENSMUSG00000039428	Tmem135	transmembrane protein 135	5.82938	7.34086	6.15526	7.13329	5.99232	7.23707	1.24476	0.00529386	0.041031
ENSMUSG00000048732	Klhl11	kelch-like 11	6.01187	8.1864	7.66089	8.2829	6.83638	8.23465	1.39827	0.0303718	0.158442
ENSMUSG00000045877	4933415A04Rik	RIKEN cDNA 4933415A04 gene	5.25705	7.16866	5.79544	7.68182	5.52624	7.42524	1.899	5.37e-05	0.000880335
ENSMUSG00000034777	Vax2	ventral anterior homeobox 2	6.74479	8.56203	6.045	8.78576	6.39489	8.67389	2.279	3.57e-09	1.4e-07
ENSMUSG00000036957	Lrfn3	leucine rich repeat and fibronectin type III domain containing 3	6.29954	6.90153	5.06668	6.97881	5.68311	6.94017	1.25706	0.0362088	0.179956
ENSMUSG00000029587	Zfp12	zinc finger protein 12	5.48584	8.87854	7.29715	9.2769	6.3915	9.07772	2.68622	0.00677531	0.0500854
ENSMUSG00000042671	Rgs8	regulator of G-protein signaling 8	8.09664	9.74779	7.84326	10.0225	7.96995	9.88514	1.91519	1.84e-10	8.67e-09
ENSMUSG00000036955	Kif1bp	KIF1 binding protein	6.25885	7.94081	6.90108	7.64804	6.57996	7.79442	1.21446	0.00597093	0.0451852
