# Supplementary material for: The m6A reader YTHDF2 is a negative regulator for dendrite development and maintenance of retinal ganglion cells
Source: eLife. 2022 Feb 18;11:e75827. doi: 10.7554/eLife.75827 (PMC8906807; doi:10.7554/eLife.75827)
Supplement: Supplementary file 2. [file elife-75827-supp2.xlsx]

## Sheet: upregulated (shYthdf2 vs shCtr)
Supplementary file 2. Proteome of YTHDF2 knockdown vs control.
Protein accession	Gene name	shYthdf2/shCtrlRatio	Regulated Type	shYthdf2/shCtrl P value	MW [kDa]	Score	Coverage [%]	Peptides	PSMs	Unique peptides	Protein description
O89001	Cpd	2.239	Up	0.0068191	152.4	27.613	5.2	7	8	7	Carboxypeptidase D OS=Mus musculus OX=10090 GN=Cpd
Q9ESN6	Trim2	2.191	Up	0.0035229	81.444	34.91	11.7	8	9	6	Tripartite motif-containing protein 2 OS=Mus musculus OX=10090 GN=Trim2
O08791	Ebf3	2.117	Up	0.0034971	64.877	4.0732	3.9	2	2	1	Transcription factor COE3 OS=Mus musculus OX=10090 GN=Ebf3
Q8BYN5	Fsd1l	2.068	Up	0.0026359	56.885	41.452	16.2	8	10	8	FSD1-like protein OS=Mus musculus OX=10090 GN=Fsd1l
Q80VL1	Tdrkh	1.95	Up	0.03612	62.133	24.737	10.2	5	7	5	Tudor and KH domain-containing protein OS=Mus musculus OX=10090 GN=Tdrkh
Q8BKI2	Tnrc6b	1.947	Up	0.0026399	191.96	61.997	7.5	10	11	10	Trinucleotide repeat-containing gene 6B protein OS=Mus musculus OX=10090 GN=Tnrc6b
O08848	Trove2	1.946	Up	0.00178331	60.123	19.842	7.2	5	8	5	60 kDa SS-A/Ro ribonucleoprotein OS=Mus musculus OX=10090 GN=Trove2
P97379	G3bp2	1.908	Up	0.00043982	54.087	27.939	13.7	7	15	7	Ras GTPase-activating protein-binding protein 2 OS=Mus musculus OX=10090 GN=G3bp2
Q9EP52	Twsg1	1.888	Up	0.0031809	24.8	1.4473	4.5	1	1	1	Twisted gastrulation protein homolog 1 OS=Mus musculus OX=10090 GN=Twsg1
Q64105	Spr	1.82	Up	0.0059048	27.883	34.823	22.6	5	5	5	Sepiapterin reductase OS=Mus musculus OX=10090 GN=Spr
Q61548	Snap91	1.808	Up	0.0032168	91.85	20.552	7.2	6	9	6	Clathrin coat assembly protein AP180 OS=Mus musculus OX=10090 GN=Snap91
Q8BR90	---	1.762	Up	0.00121567	33.471	7.6033	6.8	2	2	2	UPF0600 protein C5orf51 homolog OS=Mus musculus OX=10090
P47867	Scg3	1.748	Up	0.03754	53.326	15.483	10.6	4	6	4	Secretogranin-3 OS=Mus musculus OX=10090 GN=Scg3
Q810U5	Ccdc50	1.73	Up	4.0497e-05	35.321	27.268	10.8	3	3	3	Coiled-coil domain-containing protein 50 OS=Mus musculus OX=10090 GN=Ccdc50
Q9CW79	Golga1	1.707	Up	0.0036353	87.337	4.6615	4.4	4	4	4	Golgin subfamily A member 1 OS=Mus musculus OX=10090 GN=Golga1
Q8K0U4	Hspa12a	1.7	Up	0.0144575	74.87	65.029	23.1	15	19	15	Heat shock 70 kDa protein 12A OS=Mus musculus OX=10090 GN=Hspa12a
Q8BX90	Fndc3a	1.684	Up	0.035356	131.96	2.2505	1.4	2	2	2	Fibronectin type-III domain-containing protein 3A OS=Mus musculus OX=10090 GN=Fndc3a
P10637	Mapt	1.675	Up	0.045784	76.243	59.795	24	17	28	17	Microtubule-associated protein tau OS=Mus musculus OX=10090 GN=Mapt
Q5RKR3	Islr2	1.673	Up	0.0076977	79.757	33.772	7.5	5	6	5	Immunoglobulin superfamily containing leucine-rich repeat protein 2 OS=Mus musculus OX=10090 GN=Islr2
P07214	Sparc	1.654	Up	0.00109766	34.45	18.118	16.9	5	7	5	SPARC OS=Mus musculus OX=10090 GN=Sparc
Q922J3	Clip1	1.649	Up	0.0025604	155.81	72.682	13	17	21	16	CAP-Gly domain-containing linker protein 1 OS=Mus musculus OX=10090 GN=Clip1
O08532	Cacna2d1	1.64	Up	0.022297	124.63	6.9169	4.7	5	5	5	Voltage-dependent calcium channel subunit alpha-2/delta-1 OS=Mus musculus OX=10090 GN=Cacna2d1
Q9Z2D1	Mtmr2	1.622	Up	0.0043032	73.231	3.4757	2.6	2	2	2	Myotubularin-related protein 2 OS=Mus musculus OX=10090 GN=Mtmr2
Q91YN9	Bag2	1.613	Up	0.0027429	23.473	10.828	18.6	4	5	4	BAG family molecular chaperone regulator 2 OS=Mus musculus OX=10090 GN=Bag2
Q8C8R3	Ank2	1.609	Up	0.0097967	426.26	263.16	11	38	49	34	Ankyrin-2 OS=Mus musculus OX=10090 GN=Ank2
O54946	Dnajb6	1.598	Up	0.0196984	39.807	21.99	10.1	3	4	3	DnaJ homolog subfamily B member 6 OS=Mus musculus OX=10090 GN=Dnajb6
Q9D5V6	Syap1	1.594	Up	0.0025801	41.349	27.809	16.4	7	7	7	Synapse-associated protein 1 OS=Mus musculus OX=10090 GN=Syap1
A2A432	Cul4b	1.594	Up	0.022076	110.7	10.136	11	11	16	4	Cullin-4B OS=Mus musculus OX=10090 GN=Cul4b
P62874	Gnb1	1.587	Up	0.024779	37.377	132.13	22.4	7	17	2	Guanine nucleotide-binding protein G(I)/G(S)/G(T) subunit beta-1 OS=Mus musculus OX=10090 GN=Gnb1
Q8CCJ4	Amer2	1.579	Up	0.043759	69.932	9.3444	3	2	3	2	APC membrane recruitment protein 2 OS=Mus musculus OX=10090 GN=Amer2
O55033	Nck2	1.571	Up	0.0071179	42.879	7.7975	15.8	6	10	5	Cytoplasmic protein NCK2 OS=Mus musculus OX=10090 GN=Nck2
Q8K4G5	Ablim1	1.564	Up	0.0199205	96.804	22.476	12.1	10	13	10	Actin-binding LIM protein 1 OS=Mus musculus OX=10090 GN=Ablim1
Q9D6K8	Fundc2	1.562	Up	0.034417	16.564	11.52	13.2	2	2	2	FUN14 domain-containing protein 2 OS=Mus musculus OX=10090 GN=Fundc2
Q924X6	Lrp8	1.558	Up	0.0175049	109.82	2.4406	1	1	1	1	Low-density lipoprotein receptor-related protein 8 OS=Mus musculus OX=10090 GN=Lrp8
Q4VBE4	Egflam	1.558	Up	0.00069975	110.73	6.771	3.5	3	3	3	Pikachurin OS=Mus musculus OX=10090 GN=Egflam
Q9QZ73	Dcun1d1	1.548	Up	0.033999	30.097	24.956	10.8	3	5	3	DCN1-like protein 1 OS=Mus musculus OX=10090 GN=Dcun1d1
Q8VDQ8	Sirt2	1.544	Up	0.0036983	43.256	11.67	8.5	3	4	3	NAD-dependent protein deacetylase sirtuin-2 OS=Mus musculus OX=10090 GN=Sirt2
Q6PDI6	Mindy2	1.534	Up	0.0066752	65.636	5.2285	4.8	2	2	2	Ubiquitin carboxyl-terminal hydrolase MINDY-2 OS=Mus musculus OX=10090 GN=Mindy2
Q9DC51	Gnai3	1.518	Up	0.0061038	40.538	42.038	19.2	7	33	3	Guanine nucleotide-binding protein G(k) subunit alpha OS=Mus musculus OX=10090 GN=Gnai3
P62960	Ybx1	1.516	Up	0.00108276	35.73	211.03	23	5	13	5	Nuclease-sensitive element-binding protein 1 OS=Mus musculus OX=10090 GN=Ybx1
Q60751	Igf1r	1.512	Up	0.023221	155.79	1.9353	1.9	3	3	2	Insulin-like growth factor 1 receptor OS=Mus musculus OX=10090 GN=Igf1r
P48453	Ppp3cb	1.496	Up	0.00020216	59.173	1.4025	5.5	3	6	1	Serine/threonine-protein phosphatase 2B catalytic subunit beta isoform OS=Mus musculus OX=10090 GN=Ppp3cb
Q8CAY6	Acat2	1.495	Up	0.000180556	41.297	10.486	11.6	4	5	4	Acetyl-CoA acetyltransferase, cytosolic OS=Mus musculus OX=10090 GN=Acat2
Q9CQU5	Zwint	1.492	Up	0.00042114	28.713	5.2728	10.7	3	4	3	ZW10 interactor OS=Mus musculus OX=10090 GN=Zwint
Q8R4F1	Ntng2	1.491	Up	0.0020571	66.165	1.1053	3.4	2	2	2	Netrin-G2 OS=Mus musculus OX=10090 GN=Ntng2
Q91W59	Rbms1	1.488	Up	0.0128754	43.99	12.265	3.7	1	1	1	RNA-binding motif, single-stranded-interacting protein 1 OS=Mus musculus OX=10090 GN=Rbms1
Q8CFE4	Scyl2	1.48	Up	0.0118198	103.32	9.079	4.3	4	4	4	SCY1-like protein 2 OS=Mus musculus OX=10090 GN=Scyl2
Q8BR07	Bicd1	1.457	Up	0.0100374	95.895	11.021	8.4	7	8	6	Protein bicaudal D homolog 1 OS=Mus musculus OX=10090 GN=Bicd1
Q7TQF7	Amph	1.452	Up	0.024045	75.012	47.263	10.5	7	7	7	Amphiphysin OS=Mus musculus OX=10090 GN=Amph
A2CG49	Kalrn	1.446	Up	0.034802	337	7.4268	1.7	5	5	4	Kalirin OS=Mus musculus OX=10090 GN=Kalrn
Q5I043	Usp28	1.44	Up	0.0031598	119.32	35.67	4.9	5	6	5	Ubiquitin carboxyl-terminal hydrolase 28 OS=Mus musculus OX=10090 GN=Usp28
Q9CQ28	Dph6	1.44	Up	0.0117594	29.922	2.5743	3.7	1	1	1	Diphthine--ammonia ligase OS=Mus musculus OX=10090 GN=Dph6
Q80VA0	Galnt7	1.439	Up	0.007443	75.418	17.267	10.2	6	6	6	N-acetylgalactosaminyltransferase 7 OS=Mus musculus OX=10090 GN=Galnt7
Q9QYY8	Spast	1.433	Up	0.0013367	66.455	15.072	12.2	7	10	7	Spastin OS=Mus musculus OX=10090 GN=Spast
A2AG50	Map7d2	1.433	Up	0.000182486	86.049	3.6241	2.9	2	2	2	MAP7 domain-containing protein 2 OS=Mus musculus OX=10090 GN=Map7d2
Q91V57	Chn1	1.432	Up	0.0022821	53.193	1.0263	2.2	1	1	1	N-chimaerin OS=Mus musculus OX=10090 GN=Chn1
Q3U0V1	Khsrp	1.432	Up	0.0126804	76.775	323.31	38.9	22	40	20	Far upstream element-binding protein 2 OS=Mus musculus OX=10090 GN=Khsrp
Q9Z2C9	Mtmr7	1.431	Up	0.0152621	75.607	10.748	8.2	5	5	5	Myotubularin-related protein 7 OS=Mus musculus OX=10090 GN=Mtmr7
Q8VD63	Tspyl4	1.43	Up	3.062e-06	44.811	5.1874	5.2	2	2	2	Testis-specific Y-encoded-like protein 4 OS=Mus musculus OX=10090 GN=Tspyl4
Q06335	Aplp2	1.427	Up	0.00100036	80.466	21.946	9.8	7	11	6	Amyloid-like protein 2 OS=Mus musculus OX=10090 GN=Aplp2
Q8CCP0	Nemf	1.424	Up	0.035459	121.19	8.9268	5.1	6	6	6	Nuclear export mediator factor Nemf OS=Mus musculus OX=10090 GN=Nemf
Q9CX00	Ist1	1.423	Up	0.0021003	39.468	17.336	10.2	4	7	4	IST1 homolog OS=Mus musculus OX=10090 GN=Ist1
P26645	Marcks	1.415	Up	0.040598	29.661	74.123	21	6	16	6	Myristoylated alanine-rich C-kinase substrate OS=Mus musculus OX=10090 GN=Marcks
Q8VEH5	Epm2aip1	1.409	Up	0.045181	70.095	47.99	10.9	5	7	5	EPM2A-interacting protein 1 OS=Mus musculus OX=10090 GN=Epm2aip1
Q8BIV3	Ranbp6	1.402	Up	0.049877	124.59	14.167	5.1	5	6	4	Ran-binding protein 6 OS=Mus musculus OX=10090 GN=Ranbp6
Q91V64	Isoc1	1.399	Up	0.0145432	32.032	17.737	13.1	3	5	3	Isochorismatase domain-containing protein 1 OS=Mus musculus OX=10090 GN=Isoc1
E9Q735	Ube4a	1.399	Up	0.028436	118.2	14.347	6.2	6	6	6	Ubiquitin conjugation factor E4 A OS=Mus musculus OX=10090 GN=Ube4a
Q9R1R2	Trim3	1.397	Up	0.040582	80.774	12.683	7	5	6	3	Tripartite motif-containing protein 3 OS=Mus musculus OX=10090 GN=Trim3
Q9DCJ9	Npl	1.394	Up	0.0155172	35.13	71.026	27.5	8	16	8	N-acetylneuraminate lyase OS=Mus musculus OX=10090 GN=Npl
A2AN08	Ubr4	1.386	Up	0.023415	572.28	85.056	5.5	27	30	27	E3 ubiquitin-protein ligase UBR4 OS=Mus musculus OX=10090 GN=Ubr4
Q9D853	Eef1akmt2	1.386	Up	0.021763	26.864	19.071	9	2	6	2	EEF1A lysine methyltransferase 2 OS=Mus musculus OX=10090 GN=Eef1akmt2
P21981	Tgm2	1.374	Up	0.049676	77.06	8.7393	7.1	5	5	5	Protein-glutamine gamma-glutamyltransferase 2 OS=Mus musculus OX=10090 GN=Tgm2
Q689Z5	Sbno1	1.373	Up	0.0096617	153.74	2.9573	1.4	2	2	2	Protein strawberry notch homolog 1 OS=Mus musculus OX=10090 GN=Sbno1
Q8C1W1	Vash1	1.369	Up	0.0114163	41.874	6.8012	13.3	5	5	5	Vasohibin-1 OS=Mus musculus OX=10090 GN=Vash1
Q8VED9	Lgalsl	1.367	Up	0.0091973	18.955	19.328	16.9	3	4	3	Galectin-related protein OS=Mus musculus OX=10090 GN=Lgalsl
Q9WUU9	Mcm3ap	1.363	Up	0.0027217	217.36	7.4686	1.6	3	4	3	Germinal-center associated nuclear protein OS=Mus musculus OX=10090 GN=Mcm3ap
Q9ET54	Palld	1.363	Up	0.00061583	152.13	5.9238	3	4	4	4	Palladin OS=Mus musculus OX=10090 GN=Palld
Q63810	Ppp3r1	1.36	Up	0.034319	19.3	19.917	17.6	4	7	4	Calcineurin subunit B type 1 OS=Mus musculus OX=10090 GN=Ppp3r1
Q8K310	Matr3	1.356	Up	0.00084207	94.629	183.25	21.5	17	33	17	Matrin-3 OS=Mus musculus OX=10090 GN=Matr3
Q9D051	Pdhb	1.355	Up	0.0184231	38.937	35.965	21.2	7	13	7	Pyruvate dehydrogenase E1 component subunit beta, mitochondrial OS=Mus musculus OX=10090 GN=Pdhb
P08414	Camk4	1.355	Up	0.0076425	52.627	9.2068	9.6	4	4	4	Calcium/calmodulin-dependent protein kinase type IV OS=Mus musculus OX=10090 GN=Camk4
Q05BC3	Eml1	1.354	Up	0.00142082	89.679	46.183	14.3	11	17	10	Echinoderm microtubule-associated protein-like 1 OS=Mus musculus OX=10090 GN=Eml1
P54731	Faf1	1.353	Up	0.013745	73.862	14.411	6	4	5	4	FAS-associated factor 1 OS=Mus musculus OX=10090 GN=Faf1
Q9CZA6	Nde1	1.351	Up	0.0188369	38.522	1.0603	2.9	1	1	1	Nuclear distribution protein nudE homolog 1 OS=Mus musculus OX=10090 GN=Nde1
Q9JIW9	Ralb	1.349	Up	0.0133388	23.349	3.4989	15.5	3	5	1	Ras-related protein Ral-B OS=Mus musculus OX=10090 GN=Ralb
Q61127	Nab2	1.347	Up	0.020938	56.576	5.0895	4.8	2	3	2	NGFI-A-binding protein 2 OS=Mus musculus OX=10090 GN=Nab2
Q9JIH2	Nup50	1.345	Up	0.026039	49.485	42.397	18.2	7	9	7	Nuclear pore complex protein Nup50 OS=Mus musculus OX=10090 GN=Nup50
Q8BGS1	Epb41l5	1.341	Up	0.0193633	81.635	19.308	9.4	7	7	6	Band 4.1-like protein 5 OS=Mus musculus OX=10090 GN=Epb41l5
Q99LH9	Sh3bp5l	1.339	Up	0.025979	43.374	3.4018	4.8	2	2	2	SH3 domain-binding protein 5-like OS=Mus musculus OX=10090 GN=Sh3bp5l
Q8BHZ0	Fam49a	1.339	Up	0.048265	37.342	17.641	15.5	4	6	3	Protein FAM49A OS=Mus musculus OX=10090 GN=Fam49a
P28659	Celf1	1.339	Up	0.045678	52.107	17.99	13.8	6	11	5	CUGBP Elav-like family member 1 OS=Mus musculus OX=10090 GN=Celf1
Q00493	Cpe	1.338	Up	0.035881	53.255	67.361	22.5	10	15	10	Carboxypeptidase E OS=Mus musculus OX=10090 GN=Cpe
P26883	Fkbp1a	1.338	Up	0.0088017	11.922	51.033	25	2	7	2	Peptidyl-prolyl cis-trans isomerase FKBP1A OS=Mus musculus OX=10090 GN=Fkbp1a
O70551	Srpk1	1.338	Up	0.030957	73.088	21.435	8.8	5	6	3	SRSF protein kinase 1 OS=Mus musculus OX=10090 GN=Srpk1
Q9ERS4	Plekha3	1.337	Up	0.031317	33.423	2.86	7.7	2	2	2	Pleckstrin homology domain-containing family A member 3 OS=Mus musculus OX=10090 GN=Plekha3
Q6ZQB6	Ppip5k2	1.336	Up	0.0095006	128.43	4.7935	4	5	5	4	Inositol hexakisphosphate and diphosphoinositol-pentakisphosphate kinase 2 OS=Mus musculus OX=10090 GN=Ppip5k2
Q8K083	Znf536	1.335	Up	0.02126	141.57	5.9336	3.6	5	5	4	Zinc finger protein 536 OS=Mus musculus OX=10090 GN=Znf536
P20357	Map2	1.333	Up	0.0103954	199.13	289.11	25.4	42	65	42	Microtubule-associated protein 2 OS=Mus musculus OX=10090 GN=Map2
P62700	Ypel5	1.333	Up	0.042803	13.841	2.3957	8.3	1	1	1	Protein yippee-like 5 OS=Mus musculus OX=10090 GN=Ypel5
P15532	Nme1	1.332	Up	0.032361	17.208	102.62	48.7	9	59	3	Nucleoside diphosphate kinase A OS=Mus musculus OX=10090 GN=Nme1
Q8VEK6	Ing3	1.326	Up	0.020959	46.846	1.7023	5.2	2	2	2	Inhibitor of growth protein 3 OS=Mus musculus OX=10090 GN=Ing3
P70399	Tp53bp1	1.326	Up	0.0151035	212.73	272.66	11.9	18	28	18	TP53-binding protein 1 OS=Mus musculus OX=10090 GN=Tp53bp1
Q61909	Runx1t1	1.323	Up	0.0186431	64.337	13.87	5.4	3	3	3	Protein CBFA2T1 OS=Mus musculus OX=10090 GN=Runx1t1
Q8BP56	Pgghg	1.321	Up	0.00137725	76.487	10.751	1.9	1	2	1	Protein-glucosylgalactosylhydroxylysine glucosidase OS=Mus musculus OX=10090 GN=Pgghg
P59114	Pcif1	1.318	Up	0.027661	80.504	2.579	2.5	2	2	2	Phosphorylated CTD-interacting factor 1 OS=Mus musculus OX=10090 GN=Pcif1
Q9Z129	Recql	1.318	Up	0.048056	72.484	4.7908	3.5	3	3	3	ATP-dependent DNA helicase Q1 OS=Mus musculus OX=10090 GN=Recql
Q8K4R4	Pitpnc1	1.312	Up	0.032077	38.383	23.833	17.2	6	7	6	Cytoplasmic phosphatidylinositol transfer protein 1 OS=Mus musculus OX=10090 GN=Pitpnc1
Q8BUV3	Gphn	1.311	Up	0.00080455	83.281	44.239	13.3	10	11	10	Gephyrin OS=Mus musculus OX=10090 GN=Gphn
Q6P5G6	Ubxn7	1.309	Up	0.014678	52.164	26.642	10.7	5	8	5	UBX domain-containing protein 7 OS=Mus musculus OX=10090 GN=Ubxn7
P58252	Eef2	1.309	Up	0.032017	95.313	271.57	38.1	35	86	35	Elongation factor 2 OS=Mus musculus OX=10090 GN=Eef2
F6ZDS4	Tpr	1.307	Up	0.004296	273.99	323.31	20.8	50	75	50	Nucleoprotein TPR OS=Mus musculus OX=10090 GN=Tpr
Q8K3H0	Appl1	1.306	Up	0.00085905	79.327	23.705	7.4	5	5	4	DCC-interacting protein 13-alpha OS=Mus musculus OX=10090 GN=Appl1
Q91V51	Ttll1	1.305	Up	0.0027208	49.11	5.3843	4.5	2	2	2	Probable tubulin polyglutamylase TTLL1 OS=Mus musculus OX=10090 GN=Ttll1
O55106	Strn	1.301	Up	0.0035843	85.965	47.931	7.9	6	7	5	Striatin OS=Mus musculus OX=10090 GN=Strn
