# Supplementary material for: The m6A reader YTHDF2 is a negative regulator for dendrite development and maintenance of retinal ganglion cells
Source: eLife. 2022 Feb 18;11:e75827. doi: 10.7554/eLife.75827 (PMC8906807; doi:10.7554/eLife.75827)
Supplement: Supplementary file 3. [file elife-75827-supp3.xlsx]

## Sheet: Sheet1
Supplementary file 3. Overlapping mRNA of Y2-RIP vs Y2-KD-MS.
Gene Name	Protein Level Change after YTHDF2 KD by MS
Kalrn	Up
Ubr4	Up
Strn	Up
Islr2	Up
Hspa12a	Up
Cpd	Up
Trim2	Up
Tnrc6b	Up
Snap91	Up
Egflam	Up
Lrp8	Up
Spast	Up
Epb41l5	Up
Sh3bp5l	Up
Cpe	Up
